# Supplementary material for: Cooking Particulate Matter: A Systematic Review on Nanoparticle Exposure in the Indoor Cooking Environment
Source: MDPI journal article supplement (doi:10.3390/atmos14010012), 2022-12-21
Supplement: s1 [file s1]

Archive with 2 entries (2 files):
- Supplementary Material.pdf
- Supplementary table.xlsx
