# Supplementary material for: Cooking Particulate Matter: A Systematic Review on Nanoparticle Exposure in the Indoor Cooking Environment
Source: MDPI journal article supplement (doi:10.3390/atmos14010012), 2022-12-21
Supplement: s1 [file s1 › Supplementary Material.pdf]

### **Cooking particulate matter: A systematic review on nanoparticle exposure in the indoor cooking environment**

Joanna Izabela Lachowicz<sup>1,\*</sup>, Simone Milia<sup>1</sup>, Mariusz Jaremko<sup>2</sup>, Enrico Oddone<sup>3</sup>, Cirrincione Luigi<sup>4</sup>, Marcello Campagna<sup>1</sup>, Luigi Isaia Lecca<sup>1</sup>

<sup>1</sup> *University of Cagliari, Department of Medical Sciences and Public Health, Division of Occupational Medicine, Cittadella Universitaria, 09042 Monserrato (CA), Italy*

<sup>2</sup> *Biological and Environmental Sciences & Engineering Division (BESE), King Abdullah University of Science and Technology (KAUST), Thuwal, 23955-6900, Saudi Arabia*

<sup>3</sup> *University of Pavia, Department of Public Health, Experimental and Forensic Medicine, 27100 Pavia, Italy*

<sup>4</sup> *University of Palermo, Promozione della Salute, Materno-Infantile, di Medicina Interna e Specialistica di Eccellenza “G. D’Alessandro”, 90133 Palermo, Italy*

**First research string:**

```
((nanoparticles[Title/Abstract])
OR (ufp[Title/Abstract]))
OR (ultrafine[Title/Abstract]))
OR (PM 0,01[Title/Abstract])
AND (((cook[Title/Abstract])
OR (cooking[Title/Abstract]))
OR (kitchen[Title/Abstract])
OR (smoke[Title/Abstract])
OR (steam[Title/Abstract])
((y_10[Filter]) AND (humans[Filter]))).
```

Extending the research string selecting more keywords we collected 731 articles. The final draft is the following:

```
((((((((((((((nanoparticulate[Title/Abstract]) OR (nanoparticle[Title/Abstract]))
OR (nanoparticles[Title/Abstract])) OR (nanoscale[Title/Abstract])) OR (ultrafine[Title/Abstract]))
OR (ultrafine particles[Title/Abstract])) OR (particulate matter[Title/Abstract])) AND (y_10[Filter])
AND (y_10[Filter])) AND (((((((((((kitchen[Title/Abstract]) OR (cooking[Title/Abstract]))
OR (stove[Title/Abstract])) OR (stoves[Title/Abstract])) OR (cook[Title/Abstract]))
OR (baking[Title/Abstract])) OR (bake[Title/Abstract])) OR (cookery[Title/Abstract]))
OR (galley[Title/Abstract])) OR (gastronomy[Title/Abstract])) OR (cookhouse[Title/Abstract]))
OR (fitted kitchen[Title/Abstract])) OR (hob[Title/Abstract])) OR (stovetop[Title/Abstract]))
OR (canteen[Title/Abstract])) Filters: in the last 10 years
(("nanoparticulate"[Title/Abstract] OR "nanoparticle"[Title/Abstract]
OR "nanoparticles"[Title/Abstract] OR "nanoscale"[Title/Abstract] OR "ultrafine"[Title/Abstract]
OR "ultrafine particles"[Title/Abstract] OR "particulate matter"[Title/Abstract])
AND "2012/03/30 00:00":"3000/01/01 05:00"[Date - Publication]
```

AND "2012/03/30 00:00":"3000/01/01 05:00"[Date - Publication]  
AND ("kitchen"[Title/Abstract] OR "cooking"[Title/Abstract]  
OR "stove"[Title/Abstract] OR "stoves"[Title/Abstract] OR "cook"[Title/Abstract]  
OR "baking"[Title/Abstract] OR "bake"[Title/Abstract] OR "cookery"[Title/Abstract]  
OR "galley"[Title/Abstract] OR "gastronomy"[Title/Abstract] OR "cookhouse"[Title/Abstract]  
OR ("fittings"[All Fields] OR "seizures"[MeSH Terms] OR "seizures"[All Fields] OR "fitted"[All Fields]  
OR "fitting"[All Fields]) AND "kitchen"[Title/Abstract]) OR "hob"[Title/Abstract] OR "stovetop"[Title/Abstract]  
OR "canteen"[Title/t])) AND (y\_10[Filter]).

**Table S1.** List of ambient and laboratory studies analysing stove and fuel type as the main sources of particulate matter, which generation is influenced by the food type, food additives use, and ventilation type. ND = not defined by the authors; NA = not applicable to the studies presented.

| DOI                               | Location                                                                                                                                                | Heating/Cooking/Intervention type    | Kitchen type                                                                                                                                           | Stove type | Fuel type                                                                          | Food type                                                                                                                                                                                                          | Additional food ingredients | Ventilation type                                                                                              | Sample number | Sampling time [h]                                                                                                                                                                                                                                                                                                                 |
|-----------------------------------|---------------------------------------------------------------------------------------------------------------------------------------------------------|--------------------------------------|--------------------------------------------------------------------------------------------------------------------------------------------------------|------------|------------------------------------------------------------------------------------|--------------------------------------------------------------------------------------------------------------------------------------------------------------------------------------------------------------------|-----------------------------|---------------------------------------------------------------------------------------------------------------|---------------|-----------------------------------------------------------------------------------------------------------------------------------------------------------------------------------------------------------------------------------------------------------------------------------------------------------------------------------|
| 10.1016/j.scitotenv.2017.01.051   | (INDIA) District Fatehgarh Sahib located in South-Eastern part of Punjab state and lies between 30°25' 00" to 30°45' 45" N & 76°04' 30" to 76°35' 00" E | ND                                   | Indoor kitchen with/out partition; Outdoor enclosed kitchen; Outdoor open-air kitchen; Outdoor semi-open air kitchen                                   | ND         | agricultural residue; firewood; biogas; Liquefied Petroleum Gas                    | ND                                                                                                                                                                                                                 | ND                          | ND                                                                                                            | 60            | 24                                                                                                                                                                                                                                                                                                                                |
| 10.1016/j.scitotenv.2018.08.381   | Kishannagar village in Mahbubnagar district of southern Telangana, India (17.3850° N, 78.4867° E)                                                       | ND                                   | Indoor kitchen with partition; Indoor kitchen without partition; Separate enclosed kitchen outside the house and Open kitchen (means open-air cooking) | ND         | biomass and LPG                                                                    | ND                                                                                                                                                                                                                 | ND                          | ND                                                                                                            | 60            | 24                                                                                                                                                                                                                                                                                                                                |
| 10.1016/j.chemosphere.2020.127758 | Beilin District (within second-ring road area) of Xi'an                                                                                                 | barbecuing, Grilling and deep frying | All kitchens were separated from the dining areas, while the kitchen doors were kept open all the time                                                 | gas stove  | natural gas, except electricity was used for the two Western fast food restaurants | traditional Chinese (three served with the Shaanxi, Szechwan, and Cantonese cuisines, respectively), Modern Chinese (Chinese barbecue and Chinese fast food), and exotic cuisines (Western fast food and Japanese) | ND                          | umbrella-shaped hoods and electrostatic fume purifiers (EFP) to remove oil fumes before exhausted to ambient. | 14            | PM2.5 samples were collected in two dining peak periods, including 11:30 - 14:30 LST (lunch) and 18:00 - 21:00 LST (dinner); The background samples (field blank filters) were taken in the break time (15:00 - 18:00 LST; non-dining period) when all cooking activities were terminated for each kitchen using the same sampler |

|                                 |                                                                   |                                             |                                                                                                                                                                       |           |                                              |                                                                                                                                                                                                                                                                                                                 |       |                                                                                                                     |    |                                                                                                                                                                                                                                                                                                               |
|---------------------------------|-------------------------------------------------------------------|---------------------------------------------|-----------------------------------------------------------------------------------------------------------------------------------------------------------------------|-----------|----------------------------------------------|-----------------------------------------------------------------------------------------------------------------------------------------------------------------------------------------------------------------------------------------------------------------------------------------------------------------|-------|---------------------------------------------------------------------------------------------------------------------|----|---------------------------------------------------------------------------------------------------------------------------------------------------------------------------------------------------------------------------------------------------------------------------------------------------------------|
| 10.1016/j.scitotenv.2018.03.124 | Great Wild Goose Pagoda at Qujiang District in southeastern Xi'an | Boil; Stir-fry; bake; grill; Pan-fry;       | ground-floor restaurants; The kitchen door was kept closure all the times, and most dishes were transferred through a pick-up window (b0.5 m2) on the wall of kitchen | variable  | electricity; alcohol; natural gas;           | Various; red peppers; Pork; vegetable; noodles; marinated meat in baked bun; Meats (pork, beef, mutton, chicken), fish, vegetable; Tofu; Bread; Fish; Potato; chicken; Beef                                                                                                                                     | Curry | Electrostatic precipitator; Hydrovent;                                                                              | 8  | Gaseous and PM samples were collected in two dining periods (12:00–14:00 and 18:30–20:30 LST for lunch and supper hours, respectively) synchronously. Baseline samples (non-dining period) were taken during break period (15:00–17:00 LST) while no diner was present and cooking activities were terminated |
| 10.1016/j.buildenv.2018.12.060  | Beijing; China                                                    | Stir-frying; deep-frying; steaming; boiling | ND                                                                                                                                                                    | gas stove | natural gas                                  | designed an orthogonal test based on a survey of cooking behavior that took into consideration the typical Chinese cooking styles where gas stoves are used. Five key factors were examined (cooking method, the weight of ingredients, the type of meat, the ratio of meat to vegetables, and the type of oil) | ND    | forcedly ventilated to ensure that the PM2.5 concentration returned to the background level between each experiment | 10 | ND                                                                                                                                                                                                                                                                                                            |
| 10.1016/j.scitotenv.2013.03.018 | Kocaeli, Turkey                                                   | ND                                          | ND                                                                                                                                                                    | ND        | Charcoal; Electricity, natural gas, and wood | ND                                                                                                                                                                                                                                                                                                              | ND    | ND                                                                                                                  | 14 | ND                                                                                                                                                                                                                                                                                                            |

|                                  |                                                                                                                                                                                                                                             |                                                                                                                                                                                                                                                                  |                                                                                                                                                                             |                                                                                                                                                     |                                                                                            |          |    |                                              |     |                                                                                                                                                                                                                                                 |
|----------------------------------|---------------------------------------------------------------------------------------------------------------------------------------------------------------------------------------------------------------------------------------------|------------------------------------------------------------------------------------------------------------------------------------------------------------------------------------------------------------------------------------------------------------------|-----------------------------------------------------------------------------------------------------------------------------------------------------------------------------|-----------------------------------------------------------------------------------------------------------------------------------------------------|--------------------------------------------------------------------------------------------|----------|----|----------------------------------------------|-----|-------------------------------------------------------------------------------------------------------------------------------------------------------------------------------------------------------------------------------------------------|
| 10.1111/j.1600-0668.2011.00730.x | west of Lijiang city in Yunnan, China, at roughly 2700 m elevation in the Hengduan Mountains (N 2652', E10006')                                                                                                                             | ND                                                                                                                                                                                                                                                               | Some kitchens are enclosed, while others have windows or 20–50 cm gaps between the wall and ceiling                                                                         | stoves consist of an enclosed combustion chamber with a small sliding metal door for adding fuelwood                                                | biomass                                                                                    | ND       | ND | chimney that vents smoke outside the kitchen | 335 | 24                                                                                                                                                                                                                                              |
| 10.1111/ina.12291                | Bhutan                                                                                                                                                                                                                                      | heating (metal chimney stove), rice cooking (traditional mud stove), fodder preparation (stone tripod stove), and liquor distillation (traditional mud stove). All the cooking activities involved boiling and steaming, and no frying or grilling was involved. | mainly separately structured kitchen outside the main house                                                                                                                 | traditional stoves, built mostly from mud; stone tripod stove, the simplest open fire stove, where firewood can be fed from more than one direction | biomass, LPG (1) and electricity (1)                                                       | ND       | ND | ND                                           | 4   | The duration of activities was 5 h for heating in H1 (from 17:00 to 22:00, until occupants went to bed), 34 min for cooking in H2 (cooking rice for a family of 5), 50 min for fodder preparation in H3, and 2 h for liquor distillation in H4. |
| 10.1007/s11356-018-1831-7        | West Bengal, India                                                                                                                                                                                                                          | ND                                                                                                                                                                                                                                                               | kitchen space having at least the roof on the head, kitchen without any artificial ventilation or chimney setup, and cooking is done on the traditional earthen cook stoves | ND                                                                                                                                                  | mixed biomass fuels (dung, crop residues, husk, fire wood) predominated with cow dung cake | ND       | ND | any artificial ventilation or chimney        | 180 | ND                                                                                                                                                                                                                                              |
| 10.1007/s11356-013-2062-6        | Nouna, Burkina Faso                                                                                                                                                                                                                         | ND                                                                                                                                                                                                                                                               | ND                                                                                                                                                                          | three-stone and charcoal stoves                                                                                                                     | wood and charcoal                                                                          | ND       | ND | ND                                           | 148 | 24                                                                                                                                                                                                                                              |
| 10.3390/ijerph17165681           | Bhaktapur, Nepal                                                                                                                                                                                                                            | ND                                                                                                                                                                                                                                                               | ND                                                                                                                                                                          | ND                                                                                                                                                  | LPG, wood                                                                                  | ND       | ND | ND                                           | 19  | 24                                                                                                                                                                                                                                              |
| 10.1016/j.buildenv.2015.06.024   | northern Taiwan                                                                                                                                                                                                                             | frying, baking and stewing                                                                                                                                                                                                                                       | ND                                                                                                                                                                          | gas stove                                                                                                                                           | gas                                                                                        | ND       | ND | ND                                           | 5   | 24                                                                                                                                                                                                                                              |
| 10.1016/j.envint.2022.107155     | Dhaka (Bangladesh); Chennai (India); Nanjing (China); Medellín (Colombia); São Paulo (Brazil); Cairo (Egypt); Sulaymaniyah (Iraq); Addis Ababa (Ethiopia); Akure (Nigeria); Blantyre (Malawi); Dar-es-Salaam (Tanzania) and Nairobi (Kenya) | variable                                                                                                                                                                                                                                                         | variable                                                                                                                                                                    | variable                                                                                                                                            | natural gas, LPG, charcoal, kerosene, electric, ethanol                                    | variable | ND | natural or dual (natural+forced)             | 60  | 168                                                                                                                                                                                                                                             |

|                                   |                                                |                         |                            |                                                                                                                                                                                 |                                                                                                                                                                           |                   |    |                                                                                                                                      |     |                                                                                         |
|-----------------------------------|------------------------------------------------|-------------------------|----------------------------|---------------------------------------------------------------------------------------------------------------------------------------------------------------------------------|---------------------------------------------------------------------------------------------------------------------------------------------------------------------------|-------------------|----|--------------------------------------------------------------------------------------------------------------------------------------|-----|-----------------------------------------------------------------------------------------|
| 10.1016/j.envpol.2019.113697      | La Esperanza, Department of Intibuca, Honduras | variable                | variable                   | 30 households with a traditional cookstove and 17 households with Justa cookstove                                                                                               | gathered wood, including split logs and sticks, as the primary fuel; burning small sticks of a local wood called ocote (a species of pine) and corncobs to start the fire | ND                | ND | non-insulated open combustion area; sometimes a chimney                                                                              | 47  | 24                                                                                      |
| 10.3390/ijerph17041287            | Sindh, Pakistan                                | ND                      | ND                         | Traditional stove using biomass; Improved stove using biomass; LPG stove                                                                                                        | biomass, LPG                                                                                                                                                              | ND                | ND | ND                                                                                                                                   | 39  | 48                                                                                      |
| 10.1016/j.buildenv.2017.06.021    | San Francisco Bay area of California, USA      | water boiling           | ND                         | gas stove (cooktop, oven bottom burner, and broiler top burner, as available)                                                                                                   | natural gas                                                                                                                                                               | water boiling     | NA | windows closed, no forced air unit (FAU) operation, and no mechanical exhaust                                                        | 9   | varied from a minimum of 54min to a maximum of overnight                                |
| 10.1021/es405723w                 | China                                          | water boiling           | NA                         | gasifier cookstoves                                                                                                                                                             | Pelletized fuel                                                                                                                                                           | water boiling     | NA | with and without chimney                                                                                                             | ND  | ND                                                                                      |
| 10.1021/acs.est.5b02139           | Udaipur, India                                 | Cooking                 | separated from other rooms | traditional three-stone cookstove                                                                                                                                               | biomass (e.g. wood)                                                                                                                                                       | ND                | ND | no ventilation                                                                                                                       | 51  | 22                                                                                      |
| 10.1080/10962247.2020.1823525     | Halifax and Edmonton, Canada                   | cooking                 | ND                         | The cooktop fuel type (78% electric, 22% gas) was in general agreement with the responses from the nationwide Canadian Human Activity Pattern Survey 2 (84% electric, 16% gas). | 8% electric, 22% gas                                                                                                                                                      | ND                | ND | The range hood ventilation type was vented (55%), unvented (22%), or unknown (5%). About 18% of the homes did not have a range hood. | 132 | 24                                                                                      |
| 10.1016/j.chemosphere.2020.127758 | northwestern China                             | different cuisine types | ND                         | gas and electric stove                                                                                                                                                          | gas or electric                                                                                                                                                           | different cuisine | ND | umbrella-shaped hoods and electrostatic fume purifiers                                                                               | 14  | two dining peak periods, including 11:30e14:30 LST (lunch) and 18:00e21:00 LST (dinner) |

|                                 |                                                                   |                                                                                                                                                                                  |                                                                                                                                                                                                                                                                                                                                                                                                                                                                                                                      |                                |                                                                              |                                                                                      |    |                                                                                                                                                           |    |                         |
|---------------------------------|-------------------------------------------------------------------|----------------------------------------------------------------------------------------------------------------------------------------------------------------------------------|----------------------------------------------------------------------------------------------------------------------------------------------------------------------------------------------------------------------------------------------------------------------------------------------------------------------------------------------------------------------------------------------------------------------------------------------------------------------------------------------------------------------|--------------------------------|------------------------------------------------------------------------------|--------------------------------------------------------------------------------------|----|-----------------------------------------------------------------------------------------------------------------------------------------------------------|----|-------------------------|
| 10.1016/j.envpol.2017.04.033    | China                                                             | Frying                                                                                                                                                                           | ND                                                                                                                                                                                                                                                                                                                                                                                                                                                                                                                   | ND                             | natural gas                                                                  | sets of duplicate cooking samples were collected, using the most used 5 types of oil | ND | no ventilation and with the range hood on                                                                                                                 | 35 | 7                       |
| 10.1016/j.envres.2022.113032    | different locations in Lebanon                                    | Small pieces of beef grilled on both sides; Large pieces of skinned chicken grilled on both sides; Burger grilling, french fries frying, use of vegetables, daily dishes served; | ND                                                                                                                                                                                                                                                                                                                                                                                                                                                                                                                   | ND                             | LPG; Charcoal                                                                | beef; chicken; french fries; vegetables;                                             | ND | ND                                                                                                                                                        | 7  | 0,33                    |
| 10.3390/ijerph17145256          | Aveiro, Portugal                                                  | variable                                                                                                                                                                         | ND                                                                                                                                                                                                                                                                                                                                                                                                                                                                                                                   | gas; electric                  | gas, electricity                                                             | ND                                                                                   | ND | natural                                                                                                                                                   | 4  | 48-72                   |
| 10.1016/j.scitotenv.2021.146090 | Aveiro, Portugal                                                  | boiling and grilling                                                                                                                                                             | ND                                                                                                                                                                                                                                                                                                                                                                                                                                                                                                                   | gas; electricity               | gas; electricity                                                             | poultry                                                                              | ND | The circular-shaped chimney is equipped with an electric draft inducing fan but does not have any filtration unit or other treatment system of flue gases | 3  | ND                      |
| 10.1007/s42452-020-03800-0      | Mbarara Municipality western Uganda                               |                                                                                                                                                                                  | Kitchen volumes ranged from 12 to 81 m <sup>3</sup> and their roofs (96.6%) were metallic while only 3.4% were concrete. Kitchen walls were made of mud (5%), wood (20%) or concrete (74%) and floors were wood (3.4%), mud (41%), and cement (56%). 23% of the respondents did not open doors while cooking but only 3.4% did not open doors. 22% of the houses studied were located near the road and only 6.8% showed cross ventilation. 21% of the respondents cooked from the main house and 79% used kitchens. | open fires                     | biomass (charcoal)                                                           | ND                                                                                   | ND | natural                                                                                                                                                   | 60 | 24                      |
| 10.1016/j.envpol.2020.115592    | across northern (Shanxi) and southern China (Sichuan and Guizhou) | ND                                                                                                                                                                               | ND                                                                                                                                                                                                                                                                                                                                                                                                                                                                                                                   | 11 fuel-stove combinations     | biomass (Maize stalk, Corncob, Bean straw, Wood, Brushwood, Corncob, Bamboo) | ND                                                                                   | ND | chimney that vents smoke outside the kitchen                                                                                                              | ND | ND                      |
| 10.1016/j.envpol.2021.117754    | Hong Kong, China                                                  | Baking, Frying (pan frying, stir frying), Grilling, Steaming                                                                                                                     | ND                                                                                                                                                                                                                                                                                                                                                                                                                                                                                                                   | gas and electric stove         | town gas; electricity                                                        | common cuisines in Hong Kong                                                         | ND | ND                                                                                                                                                        | 3  | 1.5-3                   |
| 10.1021/acs.est.6b05928         | laboratory                                                        | WBT                                                                                                                                                                              | NA                                                                                                                                                                                                                                                                                                                                                                                                                                                                                                                   | open burner stove; evaporative | LPG; alcohol; kerosene; pellet; wood; charcoal; rice hulls                   | The water boiling test (WBT)                                                         | NA | NA                                                                                                                                                        | ND | from seconds to minutes |

|                              |            |                                                                                                                             |            |                                                                                                                                                          |                                                         |                                    |                                                     |                                                                                                                                                                                                                                                                                                                           |    |                                                                                                                                                                                                                              |
|------------------------------|------------|-----------------------------------------------------------------------------------------------------------------------------|------------|----------------------------------------------------------------------------------------------------------------------------------------------------------|---------------------------------------------------------|------------------------------------|-----------------------------------------------------|---------------------------------------------------------------------------------------------------------------------------------------------------------------------------------------------------------------------------------------------------------------------------------------------------------------------------|----|------------------------------------------------------------------------------------------------------------------------------------------------------------------------------------------------------------------------------|
|                              |            |                                                                                                                             |            | burner stove;<br>wick stove;<br>natural draft<br>stove; forced<br>draft stove;<br>three stone<br>fire; low<br>moisture<br>wood; high<br>moisture<br>wood |                                                         | protocol<br>(Version 4.2.2),       |                                                     |                                                                                                                                                                                                                                                                                                                           |    |                                                                                                                                                                                                                              |
| 10.1016/j.jes.2016.06.030    | laboratory | heating to 265°C                                                                                                            | ND         | ND                                                                                                                                                       | Electric                                                | Four<br>commercial<br>cooking oils | NA                                                  | without                                                                                                                                                                                                                                                                                                                   | ND | within minutes                                                                                                                                                                                                               |
| 10.1080/15459624.2012.755864 | laboratory | Frying. The temperature in the pan was 200°C when the experiment started, increasing to 270–320°C during the frying period. | NA         | electric and gas stoves                                                                                                                                  | gas                                                     | Bacon                              | ND                                                  | The canopy hood was wall-mounted centrally. The stove in use was installed under the hood, 65 cm away. During frying, the hood extracted 335 m <sup>3</sup> air/hr. Basic ventilation in the kitchen room was 119 m <sup>3</sup> /hr of air supply, and 112 m <sup>3</sup> /hr outlet (without kitchen hood ventilation). | ND | The standard frying procedure (15 min) was repeated five times during each day of frying. The repetitions were separated by a 25-min break with the ventilation on. There was also a 25-min break after the last repetition. |
| 10.3390/foods11060833        | laboratory | grilling                                                                                                                    | simulatory | ND                                                                                                                                                       | high-density bamboo charcoal (HDBC)                     | meat                               | pepper, salt, garlic powder, and compound marinade, | 40-inch by 50-inch stainless steel hood and ducted to the stack of the facility with an exhaust fan. The exhaust fan had a variable speed drive and controller, which was used to adjust the velocity and flow rates through the stack.                                                                                   | ND | ND                                                                                                                                                                                                                           |
| 10.1021/es301693f            | laboratory | boiling water test (WBT)                                                                                                    | NA         | twenty-two cookstove types                                                                                                                               | charcoal, pellets, corn cobs, rice hulls, and plant oil | NA                                 | NA                                                  | Two cookstoves were equipped with chimneys (~2 m height). Natural-draft (also termed natural convection) stoves dominated                                                                                                                                                                                                 | 44 | ND                                                                                                                                                                                                                           |

|                               |            |                                                                          |                                  |                             |            |                                                                                                                                                                                                                                    |    |                                                                                                                                                                                                                                                                                                                                                                                                                  |    |               |
|-------------------------------|------------|--------------------------------------------------------------------------|----------------------------------|-----------------------------|------------|------------------------------------------------------------------------------------------------------------------------------------------------------------------------------------------------------------------------------------|----|------------------------------------------------------------------------------------------------------------------------------------------------------------------------------------------------------------------------------------------------------------------------------------------------------------------------------------------------------------------------------------------------------------------|----|---------------|
|                               |            |                                                                          |                                  |                             |            |                                                                                                                                                                                                                                    |    | the cookstove matrix; four forced-draft (fan-provided air) stoves were also tested. Twelve stoves with batch fuel loading (e.g., charcoal stoves) required less time for tending than others that required manual fuel feeding. Four stoves were variations of the “rocket” stove design, and eight were variations of the “gasifier” design. The only traditional cooking system tested was a 3-stone cookfire. |    |               |
| 10.1016/j.scs.2019.101845     | laboratory | oils heated in a non-stick aluminum pan until visible smoke was produced | typical open kitchen environment | common electrical stove     | electric   | cooking oils: vegetable, canola, corn, olive, peanut, and coconut oils                                                                                                                                                             | ND | with (wall-mounted exhaust hood/fan) and without a smoke exhaust hood                                                                                                                                                                                                                                                                                                                                            | ND | 0.008 (30sec) |
| 10.1016/j.jenvman.2018.12.010 | laboratory | pan-frying                                                               | NA                               | electronic induction heater | electronic | salmon; Loin cut to 150 g to fit the pan-frying process was used. The frying was carried out by placing 30 ml of olive oil and a piece of salmon in a pan and heating for 450 s, after which the was salmon burnt to a crisp form. | ND | An exhaust fan and duct were installed at the top of the hood through which particulate and gaseous matter could be emitted. To reduce the impact of the external influence, all doors and windows of the laboratory were closed. After each experiment, all of the doors and windows were opened for ventilation for 30 min until the particle concentration decreased to the initial background concentration. | ND | ND            |

|                                 |            |                      |                                                                                                                                                          |                                                                                                                                                             |                                                                                  |                                                                                                                                    |    |                                                                                                                                                                                                         |     |                        |
|---------------------------------|------------|----------------------|----------------------------------------------------------------------------------------------------------------------------------------------------------|-------------------------------------------------------------------------------------------------------------------------------------------------------------|----------------------------------------------------------------------------------|------------------------------------------------------------------------------------------------------------------------------------|----|---------------------------------------------------------------------------------------------------------------------------------------------------------------------------------------------------------|-----|------------------------|
| 10.1016/j.jes.2016.06.030       | laboratory | heating              | The size of the kitchen is 4.5 m (L) × 4.0 m (W) × 3.0 m (H)                                                                                             | gas stove                                                                                                                                                   | LPG                                                                              | Three hundredmilliliter different oil (rapeseed, sunflower, soybean and corn oil) in a Supor nonstick pan was heated by liquid gas | NA | without; The kitchen was refreshed with fresh air thoroughly through the door and the ventilation between each experiment, till the kitchen air returned to background level when there was no cooking. | ND  | within minutes         |
| 10.1080/02786826.2017.1380779   | laboratory | frying               | The gasifier cookstove tested in this study was a modular laboratory prototype that allowed design and operational parameters to be precisely controlled | air gasifier cookstove during                                                                                                                               | LPG; Douglas fir wood chips; kerosene,                                           | pork                                                                                                                               | ND | ND                                                                                                                                                                                                      | ND  | within seconds/minutes |
| 10.1016/j.biombioe.2017.10.047  | laboratory | NA                   | NA                                                                                                                                                       | The WABI (D2I INVICTA, DONCHERY, FRANCE) firewood stove that was designed, built and purchased in 2012 with a nominal thermal heat output of 6 kW was used. | split beech (Fagus sylvatica) logs of 12 cm of diameter from a 40-year-old beech | NA                                                                                                                                 | NA | ND                                                                                                                                                                                                      | ND  | ND                     |
| 10.1016/j.esd.2012.08.008       | laboratory | NA                   | NA                                                                                                                                                       | wood and gas stove                                                                                                                                          | wood; gas                                                                        | NA                                                                                                                                 | NA | constant-volume displacement pump moved air through the hood at 6 m <sup>3</sup> /min with inlet air passing through high efficiency particulate air (HEPA) filters to remove background aerosol        | ND  | 0,75                   |
| 10.1021/acs.est.8b07019         | laboratory | Firepower Sweep Test | NA                                                                                                                                                       | Biomass and fossil-fuel                                                                                                                                     | LPG; kerosene; charcoal;                                                         | NA                                                                                                                                 | NA | ND                                                                                                                                                                                                      | 8   | ND                     |
| 10.1016/j.scitotenv.2021.151700 | Laboratory | cooking oils         | kitchen with a space of ~10 m <sup>2</sup> in area                                                                                                       | gas stove                                                                                                                                                   | butane gas                                                                       | representative cooking oil (i.e., rapeseed oil)                                                                                    | ND | ND                                                                                                                                                                                                      | ND  | ND                     |
| 10.1111/ina.12163               | laboratory | heating              | ND                                                                                                                                                       | Two identical single-coil,                                                                                                                                  | electric                                                                         | NA                                                                                                                                 | NA | ND                                                                                                                                                                                                      | 200 | 2-100                  |

|                   |            |       |            |                                                           |     |                                       |    |                                                                                                                                                                             |   |                          |
|-------------------|------------|-------|------------|-----------------------------------------------------------|-----|---------------------------------------|----|-----------------------------------------------------------------------------------------------------------------------------------------------------------------------------|---|--------------------------|
|                   |            |       |            | 120-volt<br>alternating<br>current<br>electric<br>burners |     |                                       |    |                                                                                                                                                                             |   |                          |
| 10.1111/ina.12542 | laboratory | mixed | laboratory | gas stove                                                 | gas | mixed food<br>products danish<br>food | ND | controlled<br>ventilation<br>conditions in a<br>test chamber;<br>two ventilation<br>scenarios that<br>varied the flow<br>rate and location<br>of the ventilation<br>extract | 4 | time of<br>cooking+30min |

**Table S2.** List of organic and inorganic compounds bound to particulate matter generated during indoor cooking activities together with the sampling and analysis methods.

| Matter  | Compound name                     | Classification | Group | Max Concentration            | Unit   | Food preparation description                                      | Sampling method                                                                                              | Analysis method                                                                                                                                                                                                                                                                                                                    | DOI                               |
|---------|-----------------------------------|----------------|-------|------------------------------|--------|-------------------------------------------------------------------|--------------------------------------------------------------------------------------------------------------|------------------------------------------------------------------------------------------------------------------------------------------------------------------------------------------------------------------------------------------------------------------------------------------------------------------------------------|-----------------------------------|
| organic | 1-Acenaphthenon                   |                | OPAHs | 168.1                        | pg m-3 | Hong Kong based restaurants and two simulated cooking experiments | Teflon-membrane (47 mm), Nuclepore polycarbonate membrane and quartz-fiber filter (47 mm)                    | The inorganic elements and water soluble ions were analysed by the Energy Dispersive X-ray Fluorescence Analyser (ED-XRF) and ion chromatography system, respectively. The polycyclic aromatic compounds (PACs) in the filters were extracted with organic solvents and determined by gas chromatography-mass spectrometry (GC-MS) | 10.1016/j.envpol.2021.117754      |
| organic | 1-butene                          | alkenes        | VOCs  | Numerical data not available | NA     | Firepower Sweep Test (FST)                                        | Vacuum canister fitted with a critical orifice (CS1200ES Sampler; ENTECH Instruments, Inc.; Simi Valley, CA) | Gas chromatograph mass spectrometer (GC-17A); Shimadzu; Kyoto, Japan                                                                                                                                                                                                                                                               | 10.1021/acs.est.8b07019           |
| organic | 1-docosanol (C <sub>22</sub> )    | alcanols       |       | 9.6±8.1                      | ng m-3 | seven different cuisine types                                     | quartz-fiber filters                                                                                         | solvent extraction-gas chromatography mass spectrometry (SE-GC/MS) method                                                                                                                                                                                                                                                          | 10.1016/j.chemosphere.2020.127758 |
| organic | 1-docosanol (C <sub>24</sub> )    | alcanols       |       | 13.4±15.5                    | ng m-3 | seven different cuisine types                                     | quartz-fiber filters                                                                                         | solvent extraction-gas chromatography mass spectrometry (SE-GC/MS) method                                                                                                                                                                                                                                                          | 10.1016/j.chemosphere.2020.127758 |
| organic | 1-dodecanol (C <sub>12</sub> )    | alcanols       |       | 16.5±12.8                    | ng m-3 | seven different cuisine types                                     | quartz-fiber filters                                                                                         | solvent extraction-gas chromatography mass spectrometry (SE-GC/MS) method                                                                                                                                                                                                                                                          | 10.1016/j.chemosphere.2020.127758 |
| organic | 1-heneicosanol (C <sub>21</sub> ) | alcanols       |       | 8.9±4.3                      | ng m-3 | seven different cuisine types                                     | quartz-fiber filters                                                                                         | solvent extraction-gas chromatography mass spectrometry (SE-GC/MS) method                                                                                                                                                                                                                                                          | 10.1016/j.chemosphere.2020.127758 |

|         |                                   |          |      |                              |        |                               |                                                                                                              |                                                                           |                                   |
|---------|-----------------------------------|----------|------|------------------------------|--------|-------------------------------|--------------------------------------------------------------------------------------------------------------|---------------------------------------------------------------------------|-----------------------------------|
| organic | 1-heptacosanol (C <sub>27</sub> ) | alcanols |      | 38.9±26.1                    | ng m-3 | seven different cuisine types | quartz-fiber filters                                                                                         | solvent extraction-gas chromatography mass spectrometry (SE-GC/MS) method | 10.1016/j.chemosphere.2020.127758 |
| organic | 1-heptadecanol (C <sub>17</sub> ) | alcanols |      | 9.1±5.4                      | ng m-3 | seven different cuisine types | quartz-fiber filters                                                                                         | solvent extraction-gas chromatography mass spectrometry (SE-GC/MS) method | 10.1016/j.chemosphere.2020.127758 |
| organic | 1-hexacosanol (C <sub>26</sub> )  | alcanols |      | 23.9±11.6                    | ng m-3 | seven different cuisine types | quartz-fiber filters                                                                                         | solvent extraction-gas chromatography mass spectrometry (SE-GC/MS) method | 10.1016/j.chemosphere.2020.127758 |
| organic | 1-hexadecanol (C <sub>16</sub> )  | alcanols |      | 81.4±35.9                    | ng m-3 | seven different cuisine types | quartz-fiber filters                                                                                         | solvent extraction-gas chromatography mass spectrometry (SE-GC/MS) method | 10.1016/j.chemosphere.2020.127758 |
| organic | 1-hexene                          | alkenes  | VOCs | Numerical data not available | NA     | Firepower Sweep Test (FST)    | Vacuum canister fitted with a critical orifice (CS1200ES Sampler; ENTECH Instruments, Inc.; Simi Valley, CA) | Gas chromatograph mass spectrometer (GC-17A); Shimadzu; Kyoto, Japan      | 10.1021/acs.est.8b07019           |
| organic | 1-icosanol (C <sub>20</sub> )     | alcanols |      | 7.2±6.7                      | ng m-3 | seven different cuisine types | quartz-fiber filters                                                                                         | solvent extraction-gas chromatography mass spectrometry (SE-GC/MS) method | 10.1016/j.chemosphere.2020.127758 |

|         |                     |           |       |         |        |                                                                   |                                                                                           |                                                                                                                                                                                                                                                                                                                                    |                                   |
|---------|---------------------|-----------|-------|---------|--------|-------------------------------------------------------------------|-------------------------------------------------------------------------------------------|------------------------------------------------------------------------------------------------------------------------------------------------------------------------------------------------------------------------------------------------------------------------------------------------------------------------------------|-----------------------------------|
| organic | 1-Indanone          |           | OPAHs | 642.4   | pg m-3 | Hong Kong based restaurants and two simulated cooking experiments | Teflon-membrane (47 mm), Nuclepore polycarbonate membrane and quartz-fiber filter (47 mm) | The inorganic elements and water soluble ions were analysed by the Energy Dispersive X-ray Fluorescence Analyser (ED-XRF) and ion chromatography system, respectively. The polycyclic aromatic compounds (PACs) in the filters were extracted with organic solvents and determined by gas chromatography-mass spectrometry (GC-MS) | 10.1016/j.envpol.2021.117754      |
| organic | 1-methylnaphthalene | two rings | PAHs  | 3.9±2.3 | ng m-3 | seven different cuisine types                                     | quartz-fiber filters                                                                      | solvent extraction-gas chromatography mass spectrometry (SE-GC/MS) method                                                                                                                                                                                                                                                          | 10.1016/j.chemosphere.2020.127758 |
| organic | 1-Methylnaphthalene | two rings | PAHs  | 617.6   | pg m-3 | Hong Kong based restaurants and two simulated cooking experiments | Teflon-membrane (47 mm), Nuclepore polycarbonate membrane and quartz-fiber filter (47 mm) | The inorganic elements and water soluble ions were analysed by the Energy Dispersive X-ray Fluorescence Analyser (ED-XRF) and ion chromatography system, respectively. The polycyclic aromatic compounds (PACs) in the filters were extracted with organic solvents and determined by gas chromatography-mass spectrometry (GC-MS) | 10.1016/j.envpol.2021.117754      |

|         |                                  |             |       |         |        |                                                                   |                                                                                           |                                                                                                                                                                                                                                                                                                                                    |                                   |
|---------|----------------------------------|-------------|-------|---------|--------|-------------------------------------------------------------------|-------------------------------------------------------------------------------------------|------------------------------------------------------------------------------------------------------------------------------------------------------------------------------------------------------------------------------------------------------------------------------------------------------------------------------------|-----------------------------------|
| organic | 1-Methylphenanthrene             | three rings | PAHs  | 481.3   | pg m-3 | Hong Kong based restaurants and two simulated cooking experiments | Teflon-membrane (47 mm), Nuclepore polycarbonate membrane and quartz-fiber filter (47 mm) | The inorganic elements and water soluble ions were analysed by the Energy Dispersive X-ray Fluorescence Analyser (ED-XRF) and ion chromatography system, respectively. The polycyclic aromatic compounds (PACs) in the filters were extracted with organic solvents and determined by gas chromatography-mass spectrometry (GC-MS) | 10.1016/j.envpol.2021.117754      |
| organic | 1-Naphthaldehyde                 | two rings   | OPAHs | 95.8    | pg m-3 | Hong Kong based restaurants and two simulated cooking experiments | Teflon-membrane (47 mm), Nuclepore polycarbonate membrane and quartz-fiber filter (47 mm) | The inorganic elements and water soluble ions were analysed by the Energy Dispersive X-ray Fluorescence Analyser (ED-XRF) and ion chromatography system, respectively. The polycyclic aromatic compounds (PACs) in the filters were extracted with organic solvents and determined by gas chromatography-mass spectrometry (GC-MS) | 10.1016/j.envpol.2021.117754      |
| organic | 1-nonadecanol (C <sub>19</sub> ) | alcanols    |       | 3.4±1.9 | ng m-3 | seven different cuisine types                                     | quartz-fiber filters                                                                      | solvent extraction-gas chromatography mass spectrometry (SE-GC/MS) method                                                                                                                                                                                                                                                          | 10.1016/j.chemosphere.2020.127758 |

|         |                                   |          |      |                              |        |                               |                                                                                                              |                                                                           |                                   |
|---------|-----------------------------------|----------|------|------------------------------|--------|-------------------------------|--------------------------------------------------------------------------------------------------------------|---------------------------------------------------------------------------|-----------------------------------|
| organic | 1-octacosanol (C <sub>28</sub> )  | alcanols |      | 33.1±18.5                    | ng m-3 | seven different cuisine types | quartz-fiber filters                                                                                         | solvent extraction-gas chromatography mass spectrometry (SE-GC/MS) method | 10.1016/j.chemosphere.2020.127758 |
| organic | 1-octadecanol (C <sub>18</sub> )  | alcanols |      | 55.9±28.7                    | ng m-3 | seven different cuisine types | quartz-fiber filters                                                                                         | solvent extraction-gas chromatography mass spectrometry (SE-GC/MS) method | 10.1016/j.chemosphere.2020.127758 |
| organic | 1-pentacosanol (C <sub>25</sub> ) | alcanols |      | 15.8±7.5                     | ng m-3 | seven different cuisine types | quartz-fiber filters                                                                                         | solvent extraction-gas chromatography mass spectrometry (SE-GC/MS) method | 10.1016/j.chemosphere.2020.127758 |
| organic | 1-pentadecanol (C <sub>15</sub> ) | alcanols |      | 13.2±7.1                     | ng m-3 | seven different cuisine types | quartz-fiber filters                                                                                         | solvent extraction-gas chromatography mass spectrometry (SE-GC/MS) method | 10.1016/j.chemosphere.2020.127758 |
| organic | 1-pentene                         | alkenes  | VOCs | Numerical data not available | NA     | Firepower Sweep Test (FST)    | Vacuum canister fitted with a critical orifice (CS1200ES Sampler; ENTECH Instruments, Inc.; Simi Valley, CA) | Gas chromatograph mass spectrometer (GC-17A); Shimadzu; Kyoto, Japan      | 10.1021/acs.est.8b07019           |
| organic | 1-tetradecanol (C <sub>14</sub> ) | alcanols |      | 41.7±16.5                    | ng m-3 | seven different cuisine types | quartz-fiber filters                                                                                         | solvent extraction-gas chromatography mass spectrometry (SE-GC/MS) method | 10.1016/j.chemosphere.2020.127758 |
| organic | 1-tricosanol (C <sub>23</sub> )   | alcanols |      | 8.3±9.6                      | ng m-3 | seven different cuisine types | quartz-fiber filters                                                                                         | solvent extraction-gas chromatography mass spectrometry (SE-GC/MS) method | 10.1016/j.chemosphere.2020.127758 |
| organic | 1-tridecanol (C <sub>13</sub> )   | alcanols |      | 8.3±4.7                      | ng m-3 | seven different cuisine types | quartz-fiber filters                                                                                         | solvent extraction-gas chromatography mass spectrometry (SE-GC/MS) method | 10.1016/j.chemosphere.2020.127758 |

|         |                                |           |      |                              |        |                                                                   |                                                                                                              |                                                                                                                                                                                                                                                                                                                                    |                                   |
|---------|--------------------------------|-----------|------|------------------------------|--------|-------------------------------------------------------------------|--------------------------------------------------------------------------------------------------------------|------------------------------------------------------------------------------------------------------------------------------------------------------------------------------------------------------------------------------------------------------------------------------------------------------------------------------------|-----------------------------------|
| organic | 1-undecanol (C <sub>11</sub> ) | alcanols  |      | 262.3±236.3                  | ng m-3 | seven different cuisine types                                     | quartz-fiber filters                                                                                         | solvent extraction-gas chromatography mass spectrometry (SE-GC/MS) method                                                                                                                                                                                                                                                          | 10.1016/j.chemosphere.2020.127758 |
| organic | 1,2-diethylbenzene             | aromatics | VOCs | Numerical data not available | NA     | Firepower Sweep Test (FST)                                        | Vacuum canister fitted with a critical orifice (CS1200ES Sampler; ENTECH Instruments, Inc.; Simi Valley, CA) | Gas chromatograph mass spectrometer (GC-17A); Shimadzu; Kyoto, Japan                                                                                                                                                                                                                                                               | 10.1021/acs.est.8b07019           |
| organic | 1,2,3-trimethylbenzene         | aromatics | VOCs | Numerical data not available | NA     | Firepower Sweep Test (FST)                                        | Vacuum canister fitted with a critical orifice (CS1200ES Sampler; ENTECH Instruments, Inc.; Simi Valley, CA) | Gas chromatograph mass spectrometer (GC-17A); Shimadzu; Kyoto, Japan                                                                                                                                                                                                                                                               | 10.1021/acs.est.8b07019           |
| organic | 1,2,3,4-Tetrahydronaphthalene  | two rings | PAHs | 435.4                        | pg m-3 | Hong Kong based restaurants and two simulated cooking experiments | Teflon-membrane (47 mm), Nuclepore polycarbonate membrane and quartz-fiber filter (47 mm)                    | The inorganic elements and water soluble ions were analysed by the Energy Dispersive X-ray Fluorescence Analyser (ED-XRF) and ion chromatography system, respectively. The polycyclic aromatic compounds (PACs) in the filters were extracted with organic solvents and determined by gas chromatography-mass spectrometry (GC-MS) | 10.1016/j.envpol.2021.117754      |
| organic | 1,2,4-trimethylbenzene         | aromatics | VOCs | Numerical data not available | NA     | Firepower Sweep Test (FST)                                        | Vacuum canister fitted with a critical orifice (CS1200ES Sampler; ENTECH Instruments, Inc.; Simi Valley, CA) | Gas chromatograph mass spectrometer (GC-17A); Shimadzu; Kyoto, Japan                                                                                                                                                                                                                                                               | 10.1021/acs.est.8b07019           |

|         |                         |           |      |                              |        |                                                                   |                                                                                                              |                                                                                                                                                                                                                                                                                                                                    |                              |
|---------|-------------------------|-----------|------|------------------------------|--------|-------------------------------------------------------------------|--------------------------------------------------------------------------------------------------------------|------------------------------------------------------------------------------------------------------------------------------------------------------------------------------------------------------------------------------------------------------------------------------------------------------------------------------------|------------------------------|
| organic | 1,3-diethylbenzene      | aromatics | VOCs | Numerical data not available | NA     | Firepower Sweep Test (FST)                                        | Vacuum canister fitted with a critical orifice (CS1200ES Sampler; ENTECH Instruments, Inc.; Simi Valley, CA) | Gas chromatograph mass spectrometer (GC-17A); Shimadzu; Kyoto, Japan                                                                                                                                                                                                                                                               | 10.1021/acs.est.8b07019      |
| organic | 1,3-Dimethylnaphthalene | two rings | PAHs | 912.8                        | pg m-3 | Hong Kong based restaurants and two simulated cooking experiments | Teflon-membrane (47 mm), Nuclepore polycarbonate membrane and quartz-fiber filter (47 mm)                    | The inorganic elements and water soluble ions were analysed by the Energy Dispersive X-ray Fluorescence Analyser (ED-XRF) and ion chromatography system, respectively. The polycyclic aromatic compounds (PACs) in the filters were extracted with organic solvents and determined by gas chromatography-mass spectrometry (GC-MS) | 10.1016/j.envpol.2021.117754 |
| organic | 1,3,5-trimethylbenzene  | aromatics | VOCs | Numerical data not available | NA     | Firepower Sweep Test (FST)                                        | Vacuum canister fitted with a critical orifice (CS1200ES Sampler; ENTECH Instruments, Inc.; Simi Valley, CA) | Gas chromatograph mass spectrometer (GC-17A); Shimadzu; Kyoto, Japan                                                                                                                                                                                                                                                               | 10.1021/acs.est.8b07019      |

|         |                     |             |       |                              |        |                                                                   |                                                                                                              |                                                                                                                                                                                                                                                                                                                                    |                              |
|---------|---------------------|-------------|-------|------------------------------|--------|-------------------------------------------------------------------|--------------------------------------------------------------------------------------------------------------|------------------------------------------------------------------------------------------------------------------------------------------------------------------------------------------------------------------------------------------------------------------------------------------------------------------------------------|------------------------------|
| organic | 1,4-Anthraquinone   | three rings | OPAHs | 359.6                        | pg m-3 | Hong Kong based restaurants and two simulated cooking experiments | Teflon-membrane (47 mm), Nuclepore polycarbonate membrane and quartz-fiber filter (47 mm)                    | The inorganic elements and water soluble ions were analysed by the Energy Dispersive X-ray Fluorescence Analyser (ED-XRF) and ion chromatography system, respectively. The polycyclic aromatic compounds (PACs) in the filters were extracted with organic solvents and determined by gas chromatography-mass spectrometry (GC-MS) | 10.1016/j.envpol.2021.117754 |
| organic | 1,4-Chrysenequinone | four rings  | OPAHs | 291.1                        | pg m-3 | Hong Kong based restaurants and two simulated cooking experiments | Teflon-membrane (47 mm), Nuclepore polycarbonate membrane and quartz-fiber filter (47 mm)                    | The inorganic elements and water soluble ions were analysed by the Energy Dispersive X-ray Fluorescence Analyser (ED-XRF) and ion chromatography system, respectively. The polycyclic aromatic compounds (PACs) in the filters were extracted with organic solvents and determined by gas chromatography-mass spectrometry (GC-MS) | 10.1016/j.envpol.2021.117754 |
| organic | 1,4-diethylbenzene  | aromatics   | VOCs  | Numerical data not available | NA     | Firepower Sweep Test (FST)                                        | Vacuum canister fitted with a critical orifice (CS1200ES Sampler; ENTECH Instruments, Inc.; Simi Valley, CA) | Gas chromatograph mass spectrometer (GC-17A); Shimadzu; Kyoto, Japan                                                                                                                                                                                                                                                               | 10.1021/acs.est.8b07019      |

|         |                                                                    |           |       |       |        |                                                                   |                                                                                           |                                                                                                                                                                                                                                                                                                                                    |                                 |
|---------|--------------------------------------------------------------------|-----------|-------|-------|--------|-------------------------------------------------------------------|-------------------------------------------------------------------------------------------|------------------------------------------------------------------------------------------------------------------------------------------------------------------------------------------------------------------------------------------------------------------------------------------------------------------------------------|---------------------------------|
| organic | 1,4-Naphthoquinone                                                 | two rings | OPAHs | 305.9 | pg m-3 | Hong Kong based restaurants and two simulated cooking experiments | Teflon-membrane (47 mm), Nuclepore polycarbonate membrane and quartz-fiber filter (47 mm) | The inorganic elements and water soluble ions were analysed by the Energy Dispersive X-ray Fluorescence Analyser (ED-XRF) and ion chromatography system, respectively. The polycyclic aromatic compounds (PACs) in the filters were extracted with organic solvents and determined by gas chromatography-mass spectrometry (GC-MS) | 10.1016/j.envpol.2021.117754    |
| organic | 1,8-Naphthalic anhydride                                           | two rings | OPAHs | 216.8 | pg m-3 | Hong Kong based restaurants and two simulated cooking experiments | Teflon-membrane (47 mm), Nuclepore polycarbonate membrane and quartz-fiber filter (47 mm) | The inorganic elements and water soluble ions were analysed by the Energy Dispersive X-ray Fluorescence Analyser (ED-XRF) and ion chromatography system, respectively. The polycyclic aromatic compounds (PACs) in the filters were extracted with organic solvents and determined by gas chromatography-mass spectrometry (GC-MS) | 10.1016/j.envpol.2021.117754    |
| organic | 13 $\alpha$ (H), 17 $\beta$ (H), 20R-Cholestane (diasterane) (C27) | steranes  |       | 33,5  | ug g-1 | poultry cooking and grilling                                      | 47 mm diameter quartz fibre filters                                                       | chromatography-mass spectrometry (GC-MS)                                                                                                                                                                                                                                                                                           | 10.1016/j.scitotenv.2021.146090 |
| organic | 13 $\alpha$ (H), 17 $\beta$ (H), 20S-Cholestane (diasterane) (C27) | steranes  |       | 42,7  | ug g-1 | poultry cooking and grilling                                      | 47 mm diameter quartz fibre filters                                                       | chromatography-mass spectrometry (GC-MS)                                                                                                                                                                                                                                                                                           | 10.1016/j.scitotenv.2021.146090 |
| organic | 13 $\beta$ (H), 17 $\alpha$ (H), 20R-Cholestane (diasterane) (C27) | steranes  |       | 52,8  | ug g-1 | poultry cooking and grilling                                      | 47 mm diameter quartz fibre filters                                                       | chromatography-mass spectrometry (GC-MS)                                                                                                                                                                                                                                                                                           | 10.1016/j.scitotenv.2021.146090 |

|         |                                                                    |           |       |                              |        |                                                                   |                                                                                                              |                                                                                                                                                                                                                                                                                                                                    |                                 |
|---------|--------------------------------------------------------------------|-----------|-------|------------------------------|--------|-------------------------------------------------------------------|--------------------------------------------------------------------------------------------------------------|------------------------------------------------------------------------------------------------------------------------------------------------------------------------------------------------------------------------------------------------------------------------------------------------------------------------------------|---------------------------------|
| organic | 13 $\beta$ (H), 17 $\alpha$ (H), 20S-Cholestane (diasterane) (C27) | steranes  |       | 89,2                         | ug g-1 | poultry cooking and grilling                                      | 47 mm diameter quartz fibre filters                                                                          | chromatography–mass spectrometry (GC–MS)                                                                                                                                                                                                                                                                                           | 10.1016/j.scitotenv.2021.146090 |
| organic | 17 $\alpha$ (H)-diahopane                                          |           |       | 146                          | ug g-1 | poultry cooking and grilling                                      | 47 mm diameter quartz fibre filters                                                                          | chromatography–mass spectrometry (GC–MS)                                                                                                                                                                                                                                                                                           | 10.1016/j.scitotenv.2021.146090 |
| organic | 17 $\alpha$ (H),21 $\beta$ (H)-30-norhopane                        |           |       | 146                          | ug g-1 | poultry cooking and grilling                                      | 47 mm diameter quartz fibre filters                                                                          | chromatography–mass spectrometry (GC–MS)                                                                                                                                                                                                                                                                                           | 10.1016/j.scitotenv.2021.146090 |
| organic | 18 $\alpha$ (H)-22,29,30-trisnorneohopane                          |           |       | 80,1                         | ug g-1 | poultry cooking and grilling                                      | 47 mm diameter quartz fibre filters                                                                          | chromatography–mass spectrometry (GC–MS)                                                                                                                                                                                                                                                                                           | 10.1016/j.scitotenv.2021.146090 |
| organic | 18 $\alpha$ (H)-30-norneohopane                                    |           |       | 24,5                         | ug g-1 | poultry cooking and grilling                                      | 47 mm diameter quartz fibre filters                                                                          | chromatography–mass spectrometry (GC–MS)                                                                                                                                                                                                                                                                                           | 10.1016/j.scitotenv.2021.146090 |
| organic | 2-Biphenylcarboxaldehyde                                           |           | OPAHs | 236.2                        | pg m-3 | Hong Kong based restaurants and two simulated cooking experiments | Teflon-membrane (47 mm), Nuclepore polycarbonate membrane and quartz-fiber filter (47 mm)                    | The inorganic elements and water soluble ions were analysed by the Energy Dispersive X-ray Fluorescence Analyser (ED-XRF) and ion chromatography system, respectively. The polycyclic aromatic compounds (PACs) in the filters were extracted with organic solvents and determined by gas chromatography–mass spectrometry (GC-MS) | 10.1016/j.envpol.2021.117754    |
| organic | 2-ethyltoluene                                                     | aromatics | VOCs  | Numerical data not available | NA     | Firepower Sweep Test (FST)                                        | Vacuum canister fitted with a critical orifice (CS1200ES Sampler; ENTECH Instruments, Inc.; Simi Valley, CA) | Gas chromatograph mass spectrometer (GC-17A); Shimadzu; Kyoto, Japan                                                                                                                                                                                                                                                               | 10.1021/acs.est.8b07019         |
| organic | 2-methyl-2-butene                                                  | alkenes   | VOCs  | Numerical data not available | NA     | Firepower Sweep Test (FST)                                        | Vacuum canister fitted with a critical orifice (CS1200ES Sampler; ENTECH Instruments, Inc.; Simi Valley, CA) | Gas chromatograph mass spectrometer (GC-17A); Shimadzu; Kyoto, Japan                                                                                                                                                                                                                                                               | 10.1021/acs.est.8b07019         |

|         |                               |             |       |                              |        |                                                                   |                                                                                                              |                                                                                                                                                                                                                                                                                                                                    |                                   |
|---------|-------------------------------|-------------|-------|------------------------------|--------|-------------------------------------------------------------------|--------------------------------------------------------------------------------------------------------------|------------------------------------------------------------------------------------------------------------------------------------------------------------------------------------------------------------------------------------------------------------------------------------------------------------------------------------|-----------------------------------|
| organic | 2-Methylanthracene-9,10-dione | three rings | OPAHs | 355.8                        | pg m-3 | Hong Kong based restaurants and two simulated cooking experiments | Teflon-membrane (47 mm), Nuclepore polycarbonate membrane and quartz-fiber filter (47 mm)                    | The inorganic elements and water soluble ions were analysed by the Energy Dispersive X-ray Fluorescence Analyser (ED-XRF) and ion chromatography system, respectively. The polycyclic aromatic compounds (PACs) in the filters were extracted with organic solvents and determined by gas chromatography-mass spectrometry (GC-MS) | 10.1016/j.envpol.2021.117754      |
| organic | 2-methylheptane               | alkanes     | VOCs  | Numerical data not available | NA     | Firepower Sweep Test (FST)                                        | Vacuum canister fitted with a critical orifice (CS1200ES Sampler; ENTECH Instruments, Inc.; Simi Valley, CA) | Gas chromatograph mass spectrometer (GC-17A); Shimadzu; Kyoto, Japan                                                                                                                                                                                                                                                               | 10.1021/acs.est.8b07019           |
| organic | 2-methylhexane                | alkanes     | VOCs  | Numerical data not available | NA     | Firepower Sweep Test (FST)                                        | Vacuum canister fitted with a critical orifice (CS1200ES Sampler; ENTECH Instruments, Inc.; Simi Valley, CA) | Gas chromatograph mass spectrometer (GC-17A); Shimadzu; Kyoto, Japan                                                                                                                                                                                                                                                               | 10.1021/acs.est.8b07019           |
| organic | 2-methylnaphthalene           | two rings   | PAHs  | 4.5±1.9                      | ng m-3 | seven different cuisine types                                     | quartz-fiber filters                                                                                         | solvent extraction-gas chromatography mass spectrometry (SE-GC/MS) method                                                                                                                                                                                                                                                          | 10.1016/j.chemosphere.2020.127758 |

|         |                        |                       |      |                              |        |                                                                   |                                                                                                              |                                                                                                                                                                                                                                                                                                                                    |                                 |
|---------|------------------------|-----------------------|------|------------------------------|--------|-------------------------------------------------------------------|--------------------------------------------------------------------------------------------------------------|------------------------------------------------------------------------------------------------------------------------------------------------------------------------------------------------------------------------------------------------------------------------------------------------------------------------------------|---------------------------------|
| organic | 2-Methylnaphthalene    | two rings             | PAHs | 542.7                        | pg m-3 | Hong Kong based restaurants and two simulated cooking experiments | Teflon-membrane (47 mm), Nuclepore polycarbonate membrane and quartz-fiber filter (47 mm)                    | The inorganic elements and water soluble ions were analysed by the Energy Dispersive X-ray Fluorescence Analyser (ED-XRF) and ion chromatography system, respectively. The polycyclic aromatic compounds (PACs) in the filters were extracted with organic solvents and determined by gas chromatography-mass spectrometry (GC-MS) | 10.1016/j.envpol.2021.117754    |
| organic | 2-Octadecanone         | Ketones and aldehydes |      | 0,411                        | ug g-1 | poultry cooking and grilling                                      | 47 mm diameter quartz fibre filters                                                                          | chromatography-mass spectrometry (GC-MS)                                                                                                                                                                                                                                                                                           | 10.1016/j.scitotenv.2021.146090 |
| organic | 2-Tridecanone          | Ketones and aldehydes |      | 2,37                         | ug g-1 | poultry cooking and grilling                                      | 47 mm diameter quartz fibre filters                                                                          | chromatography-mass spectrometry (GC-MS)                                                                                                                                                                                                                                                                                           | 10.1016/j.scitotenv.2021.146090 |
| organic | 2,2,4-trimethylpentane | alkanes               | VOCs | Numerical data not available | NA     | Firepower Sweep Test (FST)                                        | Vacuum canister fitted with a critical orifice (CS1200ES Sampler; ENTECH Instruments, Inc.; Simi Valley, CA) | Gas chromatograph mass spectrometer (GC-17A); Shimadzu; Kyoto, Japan                                                                                                                                                                                                                                                               | 10.1021/acs.est.8b07019         |
| organic | 2,3-dimethylpentane    | alkanes               | VOCs | Numerical data not available | NA     | Firepower Sweep Test (FST)                                        | Vacuum canister fitted with a critical orifice (CS1200ES Sampler; ENTECH Instruments, Inc.; Simi Valley, CA) | Gas chromatograph mass spectrometer (GC-17A); Shimadzu; Kyoto, Japan                                                                                                                                                                                                                                                               | 10.1021/acs.est.8b07019         |
| organic | 2,3,4-trimethylpentane | alkanes               | VOCs | Numerical data not available | NA     | Firepower Sweep Test (FST)                                        | Vacuum canister fitted with a critical orifice (CS1200ES Sampler; ENTECH Instruments, Inc.; Simi Valley, CA) | Gas chromatograph mass spectrometer (GC-17A); Shimadzu; Kyoto, Japan                                                                                                                                                                                                                                                               | 10.1021/acs.est.8b07019         |

|         |                                                                                             |                    |           |                              |        |                              |                                                                                                                                                                                                                 |                                                                      |                                 |
|---------|---------------------------------------------------------------------------------------------|--------------------|-----------|------------------------------|--------|------------------------------|-----------------------------------------------------------------------------------------------------------------------------------------------------------------------------------------------------------------|----------------------------------------------------------------------|---------------------------------|
| organic | 2,4-dimethylpentane                                                                         | alkanes            | VOCs      | Numerical data not available | NA     | Firepower Sweep Test (FST)   | Vacuum canister fitted with a critical orifice (CS1200ES Sampler; ENTECH Instruments, Inc.; Simi Valley, CA)                                                                                                    | Gas chromatograph mass spectrometer (GC-17A); Shimadzu; Kyoto, Japan | 10.1021/acs.est.8b07019         |
| organic | 2,5-dimethylbenzaldehyde                                                                    | aromatic aldehydes | carbonyls | Numerical data not available | NA     | Firepower Sweep Test (FST)   | Dinitrophenylhydrazine cartridge (Sep-Pak DNPH-Silica Cartridge; Waters Corp; Milford, MA) placed inline behind an ozone scrubber (Sep-Pak Ozone Scrubber Potassium Iodide Cartridge; Waters Corp; Milford, MA) | HPLC 1050 series; Agilent Technologies; Santa Clara, CA              | 10.1021/acs.est.8b07019         |
| organic | 22R 17 $\alpha$ (H),21 $\beta$ (H)-22R-homohopane                                           |                    |           | 32,3                         | ug g-1 | poultry cooking and grilling | 47 mm diameter quartz fibre filters                                                                                                                                                                             | chromatography-mass spectrometry (GC-MS)                             | 10.1016/j.scitotenv.2021.146090 |
| organic | 22S 17 $\alpha$ (H),21 $\beta$ (H)-22S-homohopane                                           |                    |           | 71                           | ug g-1 | poultry cooking and grilling | 47 mm diameter quartz fibre filters                                                                                                                                                                             | chromatography-mass spectrometry (GC-MS)                             | 10.1016/j.scitotenv.2021.146090 |
| organic | 22S 17 $\alpha$ (H),21 $\beta$ (H)-22S-homohopane                                           |                    |           | 53,2                         | ug g-1 | poultry cooking and grilling | 47 mm diameter quartz fibre filters                                                                                                                                                                             | chromatography-mass spectrometry (GC-MS)                             | 10.1016/j.scitotenv.2021.146090 |
| organic | 24-Ethyl-5 $\alpha$ (H), 14 $\alpha$ (H), 17 $\alpha$ (H) 20R-Cholestane (20R,24R) (C29)    | steranes           |           | 46,7                         | ug g-1 | poultry cooking and grilling | 47 mm diameter quartz fibre filters                                                                                                                                                                             | chromatography-mass spectrometry (GC-MS)                             | 10.1016/j.scitotenv.2021.146090 |
| organic | 24-Ethyl-5 $\alpha$ (H), 14 $\alpha$ (H), 17 $\alpha$ (H) 20S-Cholestane (20S,24R) (C29)    | steranes           |           | 43,9                         | ug g-1 | poultry cooking and grilling | 47 mm diameter quartz fibre filters                                                                                                                                                                             | chromatography-mass spectrometry (GC-MS)                             | 10.1016/j.scitotenv.2021.146090 |
| organic | 24-Ethyl-5 $\alpha$ (H), 14 $\beta$ (H), 17 $\beta$ (H) 20R-Cholestane (20R,24R) (C29)      | steranes           |           | 50,1                         | ug g-1 | poultry cooking and grilling | 47 mm diameter quartz fibre filters                                                                                                                                                                             | chromatography-mass spectrometry (GC-MS)                             | 10.1016/j.scitotenv.2021.146090 |
| organic | 24-Ethyl-5 $\alpha$ (H), 14 $\beta$ (H), 17 $\beta$ (H) 20S-Cholestane (20S,24R) (C29)      | steranes           |           | 43,6                         | ug g-1 | poultry cooking and grilling | 47 mm diameter quartz fibre filters                                                                                                                                                                             | chromatography-mass spectrometry (GC-MS)                             | 10.1016/j.scitotenv.2021.146090 |
| organic | 24-Methyl-5 $\alpha$ (H), 14 $\alpha$ (H), 17 $\alpha$ (H) 20R-Cholestane (20R,24R/S) (C28) | steranes           |           | 51,7                         | ug g-1 | poultry cooking and grilling | 47 mm diameter quartz fibre filters                                                                                                                                                                             | chromatography-mass spectrometry (GC-MS)                             | 10.1016/j.scitotenv.2021.146090 |
| organic | 24-Methyl-5 $\alpha$ (H), 14 $\alpha$ (H), 17 $\alpha$ (H) 20S-Cholestane (20S,24S) (C28)   | steranes           |           | 25,9                         | ug g-1 | poultry cooking and grilling | 47 mm diameter quartz fibre filters                                                                                                                                                                             | chromatography-mass spectrometry (GC-MS)                             | 10.1016/j.scitotenv.2021.146090 |
| organic | 24-Methyl-5 $\alpha$ (H), 14 $\beta$ (H), 17 $\beta$ (H) 20R-Cholestane (20R,24S) (C28)     | steranes           |           | 25,4                         | ug g-1 | poultry cooking and grilling | 47 mm diameter quartz fibre filters                                                                                                                                                                             | chromatography-mass spectrometry (GC-MS)                             | 10.1016/j.scitotenv.2021.146090 |
| organic | 24-Methyl-5 $\alpha$ (H), 14 $\beta$ (H), 17 $\beta$ (H) 20S-Cholestane (20S,24R) (C28)     | steranes           |           | 42,3                         | ug g-1 | poultry cooking and grilling | 47 mm diameter quartz fibre filters                                                                                                                                                                             | chromatography-mass spectrometry (GC-MS)                             | 10.1016/j.scitotenv.2021.146090 |

|         |                          |           |      |                              |        |                                                                   |                                                                                                              |                                                                                                                                                                                                                                                                                                                                    |                              |
|---------|--------------------------|-----------|------|------------------------------|--------|-------------------------------------------------------------------|--------------------------------------------------------------------------------------------------------------|------------------------------------------------------------------------------------------------------------------------------------------------------------------------------------------------------------------------------------------------------------------------------------------------------------------------------------|------------------------------|
| organic | 3-ethyltoluene           | aromatics | VOCs | Numerical data not available | NA     | Firepower Sweep Test (FST)                                        | Vacuum canister fitted with a critical orifice (CS1200ES Sampler; ENTECH Instruments, Inc.; Simi Valley, CA) | Gas chromatograph mass spectrometer (GC-17A); Shimadzu; Kyoto, Japan                                                                                                                                                                                                                                                               | 10.1021/acs.est.8b07019      |
| organic | 3-methylheptane          | alkanes   | VOCs | Numerical data not available | NA     | Firepower Sweep Test (FST)                                        | Vacuum canister fitted with a critical orifice (CS1200ES Sampler; ENTECH Instruments, Inc.; Simi Valley, CA) | Gas chromatograph mass spectrometer (GC-17A); Shimadzu; Kyoto, Japan                                                                                                                                                                                                                                                               | 10.1021/acs.est.8b07019      |
| organic | 3-methylhexane           | alkanes   | VOCs | Numerical data not available | NA     | Firepower Sweep Test (FST)                                        | Vacuum canister fitted with a critical orifice (CS1200ES Sampler; ENTECH Instruments, Inc.; Simi Valley, CA) | Gas chromatograph mass spectrometer (GC-17A); Shimadzu; Kyoto, Japan                                                                                                                                                                                                                                                               | 10.1021/acs.est.8b07019      |
| organic | 3-methylpentane          | alkanes   | VOCs | Numerical data not available | NA     | Firepower Sweep Test (FST)                                        | Vacuum canister fitted with a critical orifice (CS1200ES Sampler; ENTECH Instruments, Inc.; Simi Valley, CA) | Gas chromatograph mass spectrometer (GC-17A); Shimadzu; Kyoto, Japan                                                                                                                                                                                                                                                               | 10.1021/acs.est.8b07019      |
| organic | 3,6-Dimethylphenanthrene |           | PAHs | 251.6                        | pg m-3 | Hong Kong based restaurants and two simulated cooking experiments | Teflon-membrane (47 mm), Nuclepore polycarbonate membrane and quartz-fiber filter (47 mm)                    | The inorganic elements and water soluble ions were analysed by the Energy Dispersive X-ray Fluorescence Analyser (ED-XRF) and ion chromatography system, respectively. The polycyclic aromatic compounds (PACs) in the filters were extracted with organic solvents and determined by gas chromatography-mass spectrometry (GC-MS) | 10.1016/j.envpol.2021.117754 |

|         |                                        |           |       |                              |        |                                                                   |                                                                                                              |                                                                                                                                                                                                                                                                                                                                    |                              |
|---------|----------------------------------------|-----------|-------|------------------------------|--------|-------------------------------------------------------------------|--------------------------------------------------------------------------------------------------------------|------------------------------------------------------------------------------------------------------------------------------------------------------------------------------------------------------------------------------------------------------------------------------------------------------------------------------------|------------------------------|
| organic | 4-ethyltoluene                         | aromatics | VOCs  | Numerical data not available | NA     | Firepower Sweep Test (FST)                                        | Vacuum canister fitted with a critical orifice (CS1200ES Sampler; ENTECH Instruments, Inc.; Simi Valley, CA) | Gas chromatograph mass spectrometer (GC-17A); Shimadzu; Kyoto, Japan                                                                                                                                                                                                                                                               | 10.1021/acs.est.8b07019      |
| organic | 4H-Cyclopenta(d,e,f)phenanthrene       |           | PAHs  | 2662.8                       | pg m-3 | Hong Kong based restaurants and two simulated cooking experiments | Teflon-membrane (47 mm), Nuclepore polycarbonate membrane and quartz-fiber filter (47 mm)                    | The inorganic elements and water soluble ions were analysed by the Energy Dispersive X-ray Fluorescence Analyser (ED-XRF) and ion chromatography system, respectively. The polycyclic aromatic compounds (PACs) in the filters were extracted with organic solvents and determined by gas chromatography-mass spectrometry (GC-MS) | 10.1016/j.envpol.2021.117754 |
| organic | 4H-Cyclopenta[d,e,f]phenanthrene-4-one |           | OPAHs | 101.3                        | pg m-3 | Hong Kong based restaurants and two simulated cooking experiments | Teflon-membrane (47 mm), Nuclepore polycarbonate membrane and quartz-fiber filter (47 mm)                    | The inorganic elements and water soluble ions were analysed by the Energy Dispersive X-ray Fluorescence Analyser (ED-XRF) and ion chromatography system, respectively. The polycyclic aromatic compounds (PACs) in the filters were extracted with organic solvents and determined by gas chromatography-mass spectrometry (GC-MS) | 10.1016/j.envpol.2021.117754 |

|         |                                |            |       |        |        |                                                                   |                                                                                           |                                                                                                                                                                                                                                                                                                                                    |                              |
|---------|--------------------------------|------------|-------|--------|--------|-------------------------------------------------------------------|-------------------------------------------------------------------------------------------|------------------------------------------------------------------------------------------------------------------------------------------------------------------------------------------------------------------------------------------------------------------------------------------------------------------------------------|------------------------------|
| organic | 6H-benzo[c,d]pyrene-6-one      |            | OPAHs | 66.8   | pg m-3 | Hong Kong based restaurants and two simulated cooking experiments | Teflon-membrane (47 mm), Nuclepore polycarbonate membrane and quartz-fiber filter (47 mm) | The inorganic elements and water soluble ions were analysed by the Energy Dispersive X-ray Fluorescence Analyser (ED-XRF) and ion chromatography system, respectively. The polycyclic aromatic compounds (PACs) in the filters were extracted with organic solvents and determined by gas chromatography-mass spectrometry (GC-MS) | 10.1016/j.envpol.2021.117754 |
| organic | 7,12-Dimethylbenz[a]anthracene | four rings | PAHs  | 0.0933 | ng m-3 | General cooking activities                                        | 69 mm diameter quartz filters                                                             | GC-MS from Agilent (Santa Clara, CA, USA) with single quadrupole                                                                                                                                                                                                                                                                   | 10.3390/ijerph17145278       |
| organic | 7H-Benz[de]anthracene-7-one    | four rings | OPAHs | 259.9  | pg m-3 | Hong Kong based restaurants and two simulated cooking experiments | Teflon-membrane (47 mm), Nuclepore polycarbonate membrane and quartz-fiber filter (47 mm) | The inorganic elements and water soluble ions were analysed by the Energy Dispersive X-ray Fluorescence Analyser (ED-XRF) and ion chromatography system, respectively. The polycyclic aromatic compounds (PACs) in the filters were extracted with organic solvents and determined by gas chromatography-mass spectrometry (GC-MS) | 10.1016/j.envpol.2021.117754 |

|         |                    |             |       |           |        |                                                                   |                                                                                           |                                                                                                                                                                                                                                                                                                                                    |                                   |
|---------|--------------------|-------------|-------|-----------|--------|-------------------------------------------------------------------|-------------------------------------------------------------------------------------------|------------------------------------------------------------------------------------------------------------------------------------------------------------------------------------------------------------------------------------------------------------------------------------------------------------------------------------|-----------------------------------|
| organic | 9-fluorenone       | three rings | PAHs  | 34.1±18.4 | ng m-3 | seven different cuisine types                                     | quartz-fiber filters                                                                      | solvent extraction-gas chromatography mass spectrometry (SE-GC/MS) method                                                                                                                                                                                                                                                          | 10.1016/j.chemosphere.2020.127758 |
| organic | 9-Fluorenone       | three rings | OPAHs | 524.7     | pg m-3 | Hong Kong based restaurants and two simulated cooking experiments | Teflon-membrane (47 mm), Nuclepore polycarbonate membrane and quartz-fiber filter (47 mm) | The inorganic elements and water soluble ions were analysed by the Energy Dispersive X-ray Fluorescence Analyser (ED-XRF) and ion chromatography system, respectively. The polycyclic aromatic compounds (PACs) in the filters were extracted with organic solvents and determined by gas chromatography-mass spectrometry (GC-MS) | 10.1016/j.envpol.2021.117754      |
| organic | 9-methylanthracene | three rings | PAHs  | 3.1±1.3   | ng m-3 | seven different cuisine types                                     | quartz-fiber filters                                                                      | solvent extraction-gas chromatography mass spectrometry (SE-GC/MS) method                                                                                                                                                                                                                                                          | 10.1016/j.chemosphere.2020.127758 |

|         |                    |                  |       |                              |          |                                                                   |                                                                                                                                                                                                                      |                                                                                                                                                                                                                                                                                                                                    |                                 |
|---------|--------------------|------------------|-------|------------------------------|----------|-------------------------------------------------------------------|----------------------------------------------------------------------------------------------------------------------------------------------------------------------------------------------------------------------|------------------------------------------------------------------------------------------------------------------------------------------------------------------------------------------------------------------------------------------------------------------------------------------------------------------------------------|---------------------------------|
| organic | 9,10-Anthraquinone | three rings      | OPAHs | 413.1                        | pg m-3   | Hong Kong based restaurants and two simulated cooking experiments | Teflon-membrane (47 mm), Nuclepore polycarbonate membrane and quartz-fiber filter (47 mm)                                                                                                                            | The inorganic elements and water soluble ions were analysed by the Energy Dispersive X-ray Fluorescence Analyser (ED-XRF) and ion chromatography system, respectively. The polycyclic aromatic compounds (PACs) in the filters were extracted with organic solvents and determined by gas chromatography-mass spectrometry (GC-MS) | 10.1016/j.envpol.2021.117754    |
| organic | Abietic acid       | carboxylic acids |       | 0.073                        | ug g-1   | poultry cooking and grilling                                      | 47 mm diameter quartz fibre filters                                                                                                                                                                                  | chromatography-mass spectrometry (GC-MS)                                                                                                                                                                                                                                                                                           | 10.1016/j.scitotenv.2021.146090 |
| organic | Acenaphthene       | three rings      | PAHs  | 2                            | ug g-1   | poultry cooking and grilling                                      | 47 mm diameter quartz fibre filters                                                                                                                                                                                  | chromatography-mass spectrometry (GC-MS)                                                                                                                                                                                                                                                                                           | 10.1016/j.scitotenv.2021.146090 |
| organic | Acenaphthene       | three rings      | PAH   | Numerical data not available | NA       | ND                                                                | PAHs bounded to PM2.5 were collected on unloaded quartz fiber filters (QFFs, Tissuquartz 2500QAT-UP, PALL Corporation, USA) using a cascade impactor (PEM, SKC, PA, USA) connected to an active pump (SKC, PA, USA). | deuterated standards prior to detection. PAHs was analyzed using a gas chromatograph coupled with a mass spectrometer (GC-MS, Agilent GC 6890, MS 5973, USA) with a HP-5MS capillary column in the electron ionization (EI) mode.                                                                                                  | 10.1016/j.envpol.2020.115592    |
| organic | Acenaphthene       | three rings      | PAHs  | 0.006 ± 0.004                | [mg g-1] | General cooking activities                                        | 150 mm pure quartz microfibre filters (Fiorini, France)                                                                                                                                                              | high-resolution gas chromatography coupled to a high-resolution mass spectrometer (HRGC/HRMS).                                                                                                                                                                                                                                     | 10.1016/j.envres.2022.113032    |

|         |                |             |      |                              |        |                                                                   |                                                                                                                                                                                                                      |                                                                                                                                                                                                                                                                                                                                    |                                   |
|---------|----------------|-------------|------|------------------------------|--------|-------------------------------------------------------------------|----------------------------------------------------------------------------------------------------------------------------------------------------------------------------------------------------------------------|------------------------------------------------------------------------------------------------------------------------------------------------------------------------------------------------------------------------------------------------------------------------------------------------------------------------------------|-----------------------------------|
| organic | acenaphthene   | two rings   | PAHs | 1.6±1.4                      | ng m-3 | seven different cuisine types                                     | quartz-fiber filters                                                                                                                                                                                                 | solvent extraction-gas chromatography mass spectrometry (SE-GC/MS) method                                                                                                                                                                                                                                                          | 10.1016/j.chemosphere.2020.127758 |
| organic | Acenaphthene   | three rings | PAHs | 2096.3                       | pg m-3 | Hong Kong based restaurants and two simulated cooking experiments | Teflon-membrane (47 mm), Nuclepore polycarbonate membrane and quartz-fiber filter (47 mm)                                                                                                                            | The inorganic elements and water soluble ions were analysed by the Energy Dispersive X-ray Fluorescence Analyser (ED-XRF) and ion chromatography system, respectively. The polycyclic aromatic compounds (PACs) in the filters were extracted with organic solvents and determined by gas chromatography-mass spectrometry (GC-MS) | 10.1016/j.envpol.2021.117754      |
| organic | Acenaphthylene | three rings | PAHs | 0,672                        | ug g-1 | poultry cooking and grilling                                      | 47 mm diameter quartz fibre filters                                                                                                                                                                                  | chromatography-mass spectrometry (GC-MS)                                                                                                                                                                                                                                                                                           | 10.1016/j.scitotenv.2021.146090   |
| organic | Acenaphthylene | three rings | PAH  | Numerical data not available | NA     | ND                                                                | PAHs bounded to PM2.5 were collected on unloaded quartz fiber filters (QFFs, Tissuquartz 2500QAT-UP, PALL Corporation, USA) using a cascade impactor (PEM, SKC, PA, USA) connected to an active pump (SKC, PA, USA). | deuterated standards prior to detection. PAHs was analyzed using a gas chromatograph coupled with a mass spectrometer (GC-MS, Agilent GC 6890, MS 5973, USA) with a HP-5MS capillary column in the electron ionization (EI) mode.                                                                                                  | 10.1016/j.envpol.2020.115592      |
| organic | Acenaphthylene | three rings | PAHs | 0,101                        | ng m-3 | General cooking activities                                        | 57 mm diameter quartz filters                                                                                                                                                                                        | GC-MS from Agilent (Santa Clara, CA, USA) with single quadrupole                                                                                                                                                                                                                                                                   | 10.3390/ijerph17145266            |

|         |                   |                     |           |                              |        |                                                                   |                                                                                                                                                                                                                 |                                                                                                                                                                                                                                                                                                                                    |                                   |
|---------|-------------------|---------------------|-----------|------------------------------|--------|-------------------------------------------------------------------|-----------------------------------------------------------------------------------------------------------------------------------------------------------------------------------------------------------------|------------------------------------------------------------------------------------------------------------------------------------------------------------------------------------------------------------------------------------------------------------------------------------------------------------------------------------|-----------------------------------|
| organic | acenaphthylene    | three rings         | PAHs      | 12.5±13.1                    | ng m-3 | seven different cuisine types                                     | quartz-fiber filters                                                                                                                                                                                            | solvent extraction-gas chromatography mass spectrometry (SE-GC/MS) method                                                                                                                                                                                                                                                          | 10.1016/j.chemosphere.2020.127758 |
| organic | Acenaphthylene    | three rings         | PAHs      | 364.2                        | pg m-3 | Hong Kong based restaurants and two simulated cooking experiments | Teflon-membrane (47 mm), Nuclepore polycarbonate membrane and quartz-fiber filter (47 mm)                                                                                                                       | The inorganic elements and water soluble ions were analysed by the Energy Dispersive X-ray Fluorescence Analyser (ED-XRF) and ion chromatography system, respectively. The polycyclic aromatic compounds (PACs) in the filters were extracted with organic solvents and determined by gas chromatography-mass spectrometry (GC-MS) | 10.1016/j.envpol.2021.117754      |
| organic | acephenanthrylene | four rings          | PAHs      | Numerical data not available | NA     | Firepower Sweep Test (FST)                                        | Particle phase: Tissuquartz #2500QAT-UP; Pall Corporation; Port Washington, NY; Gas phase: PUF Replacement P226-92; SKC-West, Inc; Fullerton, CA (two inline)                                                   | Agilent 6890/5973 Inert, Agilent Technologies, Santa Clara, CA                                                                                                                                                                                                                                                                     | 10.1021/acs.est.8b07019           |
| organic | acetaldehyde      | saturated aldehydes | carbonyls | Numerical data not available | NA     | Firepower Sweep Test (FST)                                        | Dinitrophenylhydrazine cartridge (Sep-Pak DNPH-Silica Cartridge; Waters Corp; Milford, MA) placed inline behind an ozone scrubber (Sep-Pak Ozone Scrubber Potassium Iodide Cartridge; Waters Corp; Milford, MA) | HPLC 1050 series; Agilent Technologies; Santa Clara, CA                                                                                                                                                                                                                                                                            | 10.1021/acs.est.8b07019           |

|         |                |                       |           |                              |        |                                                                   |                                                                                                                                                                                                                 |                                                                                                                                                                                                                                                                                                                                    |                                 |
|---------|----------------|-----------------------|-----------|------------------------------|--------|-------------------------------------------------------------------|-----------------------------------------------------------------------------------------------------------------------------------------------------------------------------------------------------------------|------------------------------------------------------------------------------------------------------------------------------------------------------------------------------------------------------------------------------------------------------------------------------------------------------------------------------------|---------------------------------|
| organic | acetone        | ketones               | carbonyls | Numerical data not available | NA     | Firepower Sweep Test (FST)                                        | Dinitrophenylhydrazine cartridge (Sep-Pak DNPH-Silica Cartridge; Waters Corp; Milford, MA) placed inline behind an ozone scrubber (Sep-Pak Ozone Scrubber Potassium Iodide Cartridge; Waters Corp; Milford, MA) | HPLC 1050 series; Agilent Technologies; Santa Clara, CA                                                                                                                                                                                                                                                                            | 10.1021/acs.est.8b07019         |
| organic | Acetosyringone | Ketones and aldehydes |           | 0,243                        | ug g-1 | poultry cooking and grilling                                      | 47 mm diameter quartz fibre filters                                                                                                                                                                             | chromatography–mass spectrometry (GC–MS)                                                                                                                                                                                                                                                                                           | 10.1016/j.scitotenv.2021.146090 |
| organic | Acridine       |                       | Azaarenes | 36                           | pg m-3 | Hong Kong based restaurants and two simulated cooking experiments | Teflon-membrane (47 mm), Nuclepore polycarbonate membrane and quartz-fiber filter (47 mm)                                                                                                                       | The inorganic elements and water soluble ions were analysed by the Energy Dispersive X-ray Fluorescence Analyser (ED-XRF) and ion chromatography system, respectively. The polycyclic aromatic compounds (PACs) in the filters were extracted with organic solvents and determined by gas chromatography–mass spectrometry (GC-MS) | 10.1016/j.envpol.2021.117754    |
| organic | acrolein       | unsaturated aldehydes | carbonyls | Numerical data not available | NA     | Firepower Sweep Test (FST)                                        | Dinitrophenylhydrazine cartridge (Sep-Pak DNPH-Silica Cartridge; Waters Corp; Milford, MA) placed inline behind an ozone scrubber (Sep-Pak Ozone Scrubber Potassium Iodide Cartridge; Waters Corp; Milford, MA) | HPLC 1050 series; Agilent Technologies; Santa Clara, CA                                                                                                                                                                                                                                                                            | 10.1021/acs.est.8b07019         |

|           |                                          |                    |            |                              |          |                                                                   |                                                                                                              |                                                                                                                                                                                                                                                                                                                                    |                                   |
|-----------|------------------------------------------|--------------------|------------|------------------------------|----------|-------------------------------------------------------------------|--------------------------------------------------------------------------------------------------------------|------------------------------------------------------------------------------------------------------------------------------------------------------------------------------------------------------------------------------------------------------------------------------------------------------------------------------------|-----------------------------------|
| organic   | adipic acid (C <sub>6</sub> )            | Dicarboxylic acids |            | 162.9±86.1                   | ng m-3   | seven different cuisine types                                     | quartz-fiber filters                                                                                         | solvent extraction-gas chromatography mass spectrometry (SE-GC/MS) method                                                                                                                                                                                                                                                          | 10.1016/j.chemosphere.2020.127758 |
| Inorganic | Ag                                       | inorganic ions     |            | 0.17 ± 0.11                  | [mg g-1] | General cooking activities                                        | 150 mm pure quartz microfibres filters (Fiorini, France)                                                     | ICP-Mass Spectrometry (ICP-MS, Agilent 7900, United States of America)                                                                                                                                                                                                                                                             | 10.1016/j.envres.2022.113032      |
| Inorganic | Al                                       | inorganic ions     |            | 16.7 ± 5.9                   | [mg g-1] | General cooking activities                                        | 150 mm pure quartz microfibres filters (Fiorini, France)                                                     | Inductively Coupled Plasma-Atomic Emission Spectrometry (ICP-AES, iCAP 6000 series, Thermo Scientific, United Kingdom)                                                                                                                                                                                                             | 10.1016/j.envres.2022.113032      |
| Inorganic | Al                                       |                    | metal ions | 171.7                        | ng m-3   | Hong Kong based restaurants and two simulated cooking experiments | Teflon-membrane (47 mm), Nuclepore polycarbonate membrane and quartz-fiber filter (47 mm)                    | The inorganic elements and water soluble ions were analysed by the Energy Dispersive X-ray Fluorescence Analyser (ED-XRF) and ion chromatography system, respectively. The polycyclic aromatic compounds (PACs) in the filters were extracted with organic solvents and determined by gas chromatography-mass spectrometry (GC-MS) | 10.1016/j.envpol.2021.117754      |
| organic   | alpha-pinene                             | alkenes            | VOCs       | Numerical data not available | NA       | Firepower Sweep Test (FST)                                        | Vacuum canister fitted with a critical orifice (CS1200ES Sampler; ENTECH Instruments, Inc.; Simi Valley, CA) | Gas chromatograph mass spectrometer (GC-17A); Shimadzu; Kyoto, Japan                                                                                                                                                                                                                                                               | 10.1021/acs.est.8b07019           |
| Inorganic | ammonium (NH <sub>4</sub> <sup>+</sup> ) | inorganic ions     |            | Numerical data not available | NA       | Firepower Sweep Test (FST)                                        |                                                                                                              | CS-3000 Ion Chromatography System; Dionex; Waltham, MA                                                                                                                                                                                                                                                                             | 10.1021/acs.est.8b07019           |

|           |                                          |                |  |             |                       |                                                                   |                                                                                           |                                                                                                                                                                                                                                                                                                                                    |                                   |
|-----------|------------------------------------------|----------------|--|-------------|-----------------------|-------------------------------------------------------------------|-------------------------------------------------------------------------------------------|------------------------------------------------------------------------------------------------------------------------------------------------------------------------------------------------------------------------------------------------------------------------------------------------------------------------------------|-----------------------------------|
| Inorganic | ammonium (NH <sub>4</sub> <sup>+</sup> ) | inorganic ions |  | 35.0 ± 18.7 | [mg g <sup>-1</sup> ] | General cooking activities                                        | 150 mm pure quartz microfibre filters (Fiorini, France)                                   | liquid ion chromatography (Dionex™ ICS-900, Thermo Scientific, United Kingdom)                                                                                                                                                                                                                                                     | 10.1016/j.envres.2022.113032      |
| Inorganic | ammonium (NH <sub>4</sub> <sup>+</sup> ) | inorganic ions |  | 8.0         | ug m <sup>-3</sup>    | Hong Kong based restaurants and two simulated cooking experiments | Teflon-membrane (47 mm), Nuclepore polycarbonate membrane and quartz-fiber filter (47 mm) | The inorganic elements and water soluble ions were analysed by the Energy Dispersive X-ray Fluorescence Analyser (ED-XRF) and ion chromatography system, respectively. The polycyclic aromatic compounds (PACs) in the filters were extracted with organic solvents and determined by gas chromatography-mass spectrometry (GC-MS) | 10.1016/j.envpol.2021.117754      |
| organic   | anteiso-C <sub>29</sub>                  | alcanes        |  | 4.9±6.9     | ng m <sup>-3</sup>    | seven different cuisine types                                     | quartz-fiber filters                                                                      | solvent extraction-gas chromatography mass spectrometry (SE-GC/MS) method                                                                                                                                                                                                                                                          | 10.1016/j.chemosphere.2020.127758 |
| organic   | anteiso-C <sub>30</sub>                  | alcanes        |  | 1.1±0.9     | ng m <sup>-3</sup>    | seven different cuisine types                                     | quartz-fiber filters                                                                      | solvent extraction-gas chromatography mass spectrometry (SE-GC/MS) method                                                                                                                                                                                                                                                          | 10.1016/j.chemosphere.2020.127758 |
| organic   | anteiso-C <sub>31</sub>                  | alcanes        |  | 8.5±5.6     | ng m <sup>-3</sup>    | seven different cuisine types                                     | quartz-fiber filters                                                                      | solvent extraction-gas chromatography mass spectrometry (SE-GC/MS) method                                                                                                                                                                                                                                                          | 10.1016/j.chemosphere.2020.127758 |

|         |              |             |      |                              |        |                               |                                                                                                                                                                                                                      |                                                                                                                                                                                                                                   |                                   |
|---------|--------------|-------------|------|------------------------------|--------|-------------------------------|----------------------------------------------------------------------------------------------------------------------------------------------------------------------------------------------------------------------|-----------------------------------------------------------------------------------------------------------------------------------------------------------------------------------------------------------------------------------|-----------------------------------|
| organic | Anthanthrene |             | PAH  | Numerical data not available | NA     | ND                            | PAHs bounded to PM2.5 were collected on unloaded quartz fiber filters (QFFs, Tissuquartz 2500QAT-UP, PALL Corporation, USA) using a cascade impactor (PEM, SKC, PA, USA) connected to an active pump (SKC, PA, USA). | deuterated standards prior to detection. PAHs was analyzed using a gas chromatograph coupled with a mass spectrometer (GC-MS, Agilent GC 6890, MS 5973, USA) with a HP-5MS capillary column in the electron ionization (EI) mode. | 10.1016/j.envpol.2020.115592      |
| organic | anthracene   | three rings | PAHs | Numerical data not available | NA     | Firepower Sweep Test (FST)    | Particle phase: Tissuquartz #2500QAT-UP; Pall Corporation; Port Washington, NY; Gas phase: PUF Replacement P226-92; SKC-West, Inc; Fullerton, CA (two inline)                                                        | Agilent 6890/5973 Inert, Agilent Technologies, Santa Clara, CA                                                                                                                                                                    | 10.1021/acs.est.8b07019           |
| organic | Anthracene   | three rings | PAHs | 10,5                         | ug g-1 | poultry cooking and grilling  | 47 mm diameter quartz fibre filters                                                                                                                                                                                  | chromatography-mass spectrometry (GC-MS)                                                                                                                                                                                          | 10.1016/j.scitotenv.2021.146090   |
| organic | Anthracene   |             | PAH  | Numerical data not available | NA     | ND                            | PAHs bounded to PM2.5 were collected on unloaded quartz fiber filters (QFFs, Tissuquartz 2500QAT-UP, PALL Corporation, USA) using a cascade impactor (PEM, SKC, PA, USA) connected to an active pump (SKC, PA, USA). | deuterated standards prior to detection. PAHs was analyzed using a gas chromatograph coupled with a mass spectrometer (GC-MS, Agilent GC 6890, MS 5973, USA) with a HP-5MS capillary column in the electron ionization (EI) mode. | 10.1016/j.envpol.2020.115592      |
| organic | Anthracene   | three rings | PAHs | 0,0473                       | ng m-3 | General cooking activities    | 61 mm diameter quartz filters                                                                                                                                                                                        | GC-MS from Agilent (Santa Clara, CA, USA) with single quadrupole                                                                                                                                                                  | 10.3390/ijerph17145270            |
| organic | anthracene   | three rings | PAHs | 30.5±4.7                     | ng m-3 | seven different cuisine types | quartz-fiber filters                                                                                                                                                                                                 | solvent extraction-gas chromatography mass spectrometry (SE-GC/MS) method                                                                                                                                                         | 10.1016/j.chemosphere.2020.127758 |

|           |                                |                    |               |                              |          |                                                                                      |                                                                                           |                                                                                                                                                                                                                                                                                                                                    |                                   |
|-----------|--------------------------------|--------------------|---------------|------------------------------|----------|--------------------------------------------------------------------------------------|-------------------------------------------------------------------------------------------|------------------------------------------------------------------------------------------------------------------------------------------------------------------------------------------------------------------------------------------------------------------------------------------------------------------------------------|-----------------------------------|
| organic   | Anthracene                     |                    | PAHs          | 273.8                        | pg m-3   | Hong Kong based restaurants and two simulated cooking experiments                    | Teflon-membrane (47 mm), Nuclepore polycarbonate membrane and quartz-fiber filter (47 mm) | The inorganic elements and water soluble ions were analysed by the Energy Dispersive X-ray Fluorescence Analyser (ED-XRF) and ion chromatography system, respectively. The polycyclic aromatic compounds (PACs) in the filters were extracted with organic solvents and determined by gas chromatography-mass spectrometry (GC-MS) | 10.1016/j.envpol.2021.117754      |
| organic   | arabinose                      | carbohydrates      | carbohydrates | Numerical data not available | NA       | Firepower Sweep Test (FST)                                                           | Tissuquartz #2500QAT-UP; Pall Corporation; Port Washington, NY                            | 1260 Infinity; Agilent Technologies; Santa Clara, CA                                                                                                                                                                                                                                                                               | 10.1021/acs.est.8b07019           |
| Inorganic | As                             | inorganic ions     |               | 0.006 ± 0.001                | [mg g-1] | General cooking activities                                                           | 150 mm pure quartz microfibre filters (Fiorini, France)                                   | ICP-Mass Spectrometry (ICP-MS, Agilent 7900, United States of America)                                                                                                                                                                                                                                                             | 10.1016/j.envres.2022.113032      |
| Inorganic | As                             | inorganic ions     |               | 0.006 ± 0.001                | [mg g-1] | sets of duplicate cooking samples were collected, using the most used 5 types of oil | 37 mm polypropylene-fiber filter (Pall-Gelman, Ann Arbor, MI, USA)                        | ICP-MS, Agilent 7500a, Agilent Co, Santa Clara, USA                                                                                                                                                                                                                                                                                | 10.1016/j.envpol.2017.04.033      |
| organic   | azelaic acid (C <sub>9</sub> ) | Dicarboxylic acids |               | 732.5±804.9                  | ng m-3   | seven different cuisine types                                                        | quartz-fiber filters                                                                      | solvent extraction-gas chromatography mass spectrometry (SE-GC/MS) method                                                                                                                                                                                                                                                          | 10.1016/j.chemosphere.2020.127758 |

|         |                  |            |      |                              |    |                            |                                                                                                                                                               |                                                                |                         |
|---------|------------------|------------|------|------------------------------|----|----------------------------|---------------------------------------------------------------------------------------------------------------------------------------------------------------|----------------------------------------------------------------|-------------------------|
| organic | b[a]pyrene       | four rings | PAHs | Numerical data not available | NA | Firepower Sweep Test (FST) | Particle phase: Tissuquartz #2500QAT-UP; Pall Corporation; Port Washington, NY; Gas phase: PUF Replacement P226-92; SKC-West, Inc; Fullerton, CA (two inline) | Agilent 6890/5973 Inert, Agilent Technologies, Santa Clara, CA | 10.1021/acs.est.8b07019 |
| organic | b[b]fluoranthene | five rings | PAHs | Numerical data not available | NA | Firepower Sweep Test (FST) | Particle phase: Tissuquartz #2500QAT-UP; Pall Corporation; Port Washington, NY; Gas phase: PUF Replacement P226-92; SKC-West, Inc; Fullerton, CA (two inline) | Agilent 6890/5973 Inert, Agilent Technologies, Santa Clara, CA | 10.1021/acs.est.8b07019 |
| organic | b[e]pyrene       | five rings | PAHs | Numerical data not available | NA | Firepower Sweep Test (FST) | Particle phase: Tissuquartz #2500QAT-UP; Pall Corporation; Port Washington, NY; Gas phase: PUF Replacement P226-92; SKC-West, Inc; Fullerton, CA (two inline) | Agilent 6890/5973 Inert, Agilent Technologies, Santa Clara, CA | 10.1021/acs.est.8b07019 |
| organic | b[j]fluoranthene | five rings | PAHs | Numerical data not available | NA | Firepower Sweep Test (FST) | Particle phase: Tissuquartz #2500QAT-UP; Pall Corporation; Port Washington, NY; Gas phase: PUF Replacement P226-92; SKC-West, Inc; Fullerton, CA (two inline) | Agilent 6890/5973 Inert, Agilent Technologies, Santa Clara, CA | 10.1021/acs.est.8b07019 |
| organic | b[k]fluoranthene | five rings | PAHs | Numerical data not available | NA | Firepower Sweep Test (FST) | Particle phase: Tissuquartz #2500QAT-UP; Pall Corporation; Port Washington, NY; Gas phase: PUF Replacement P226-92; SKC-West, Inc; Fullerton, CA (two inline) | Agilent 6890/5973 Inert, Agilent Technologies, Santa Clara, CA | 10.1021/acs.est.8b07019 |

|           |                   |            |            |                              |          |                                                                                      |                                                                                                                                                               |                                                                                                                                                                                                                                                                                                                                    |                              |
|-----------|-------------------|------------|------------|------------------------------|----------|--------------------------------------------------------------------------------------|---------------------------------------------------------------------------------------------------------------------------------------------------------------|------------------------------------------------------------------------------------------------------------------------------------------------------------------------------------------------------------------------------------------------------------------------------------------------------------------------------------|------------------------------|
| Inorganic | Ba                |            | metal ions | 144.3                        | ng m-3   | Hong Kong based restaurants and two simulated cooking experiments                    | Teflon-membrane (47 mm), Nuclepore polycarbonate membrane and quartz-fiber filter (47 mm)                                                                     | The inorganic elements and water soluble ions were analysed by the Energy Dispersive X-ray Fluorescence Analyser (ED-XRF) and ion chromatography system, respectively. The polycyclic aromatic compounds (PACs) in the filters were extracted with organic solvents and determined by gas chromatography-mass spectrometry (GC-MS) | 10.1016/j.envpol.2021.117754 |
| organic   | benz[a]anthracene | four rings | PAHs       | 0.001 ± 0.000                | [mg g-1] | sets of duplicate cooking samples were collected, using the most used 5 types of oil | quartz fiber filter (Pall-Gelman, Ann Arbor, MI, USA)                                                                                                         | gas chromatography coupled with mass spectrometry method (GC/MS, trace 2000 GC-MS, Thermo Finnigan, USA)                                                                                                                                                                                                                           | 10.1016/j.envpol.2017.04.033 |
| organic   | benz[a]anthracene | four rings | PAHs       | Numerical data not available | NA       | Firepower Sweep Test (FST)                                                           | Particle phase: Tissuquartz #2500QAT-UP; Pall Corporation; Port Washington, NY; Gas phase: PUF Replacement P226-92; SKC-West, Inc; Fullerton, CA (two inline) | Agilent 6890/5973 Inert, Agilent Technologies, Santa Clara, CA                                                                                                                                                                                                                                                                     | 10.1021/acs.est.8b07019      |

|         |                              |  |       |       |        |                                                                   |                                                                                           |                                                                                                                                                                                                                                                                                                                                    |                              |
|---------|------------------------------|--|-------|-------|--------|-------------------------------------------------------------------|-------------------------------------------------------------------------------------------|------------------------------------------------------------------------------------------------------------------------------------------------------------------------------------------------------------------------------------------------------------------------------------------------------------------------------------|------------------------------|
| organic | Benz[a]anthracene            |  | PAHs  | 275.2 | pg m-3 | Hong Kong based restaurants and two simulated cooking experiments | Teflon-membrane (47 mm), Nuclepore polycarbonate membrane and quartz-fiber filter (47 mm) | The inorganic elements and water soluble ions were analysed by the Energy Dispersive X-ray Fluorescence Analyser (ED-XRF) and ion chromatography system, respectively. The polycyclic aromatic compounds (PACs) in the filters were extracted with organic solvents and determined by gas chromatography-mass spectrometry (GC-MS) | 10.1016/j.envpol.2021.117754 |
| organic | Benz[a]anthracene-7,12-dione |  | OPAHs | 112.4 | pg m-3 | Hong Kong based restaurants and two simulated cooking experiments | Teflon-membrane (47 mm), Nuclepore polycarbonate membrane and quartz-fiber filter (47 mm) | The inorganic elements and water soluble ions were analysed by the Energy Dispersive X-ray Fluorescence Analyser (ED-XRF) and ion chromatography system, respectively. The polycyclic aromatic compounds (PACs) in the filters were extracted with organic solvents and determined by gas chromatography-mass spectrometry (GC-MS) | 10.1016/j.envpol.2021.117754 |

|         |                    |                    |           |                              |    |                            |                                                                                                                                                                                                                      |                                                                                                                                                                                                                                   |                              |
|---------|--------------------|--------------------|-----------|------------------------------|----|----------------------------|----------------------------------------------------------------------------------------------------------------------------------------------------------------------------------------------------------------------|-----------------------------------------------------------------------------------------------------------------------------------------------------------------------------------------------------------------------------------|------------------------------|
| organic | benzaldehyde       | aromatic aldehydes | carbonyls | Numerical data not available | NA | Firepower Sweep Test (FST) | Dinitrophenylhydrazine cartridge (Sep-Pak DNPH-Silica Cartridge; Waters Corp; Milford, MA) placed inline behind an ozone scrubber (Sep-Pak Ozone Scrubber Potassium Iodide Cartridge; Waters Corp; Milford, MA)      | HPLC 1050 series; Agilent Technologies; Santa Clara, CA                                                                                                                                                                           | 10.1021/acs.est.8b07019      |
| organic | benzene            | aromatics          | VOCs      | Numerical data not available | NA | Firepower Sweep Test (FST) | Vacuum canister fitted with a critical orifice (CS1200ES Sampler; ENTECH Instruments, Inc.; Simi Valley, CA)                                                                                                         | Gas chromatograph mass spectrometer (GC-17A); Shimadzu; Kyoto, Japan                                                                                                                                                              | 10.1021/acs.est.8b07019      |
| organic | Benzo(a)anthracene |                    | PAH       | Numerical data not available | NA | ND                         | PAHs bounded to PM2.5 were collected on unloaded quartz fiber filters (QFFs, Tissuquartz 2500QAT-UP, PALL Corporation, USA) using a cascade impactor (PEM, SKC, PA, USA) connected to an active pump (SKC, PA, USA). | deuterated standards prior to detection. PAHs was analyzed using a gas chromatograph coupled with a mass spectrometer (GC-MS, Agilent GC 6890, MS 5973, USA) with a HP-5MS capillary column in the electron ionization (EI) mode. | 10.1016/j.envpol.2020.115592 |
| organic | Benzo(a)pyrene     |                    | PAH       | Numerical data not available | NA | ND                         | PAHs bounded to PM2.5 were collected on unloaded quartz fiber filters (QFFs, Tissuquartz 2500QAT-UP, PALL Corporation, USA) using a cascade impactor (PEM, SKC, PA, USA) connected to an active pump (SKC, PA, USA). | deuterated standards prior to detection. PAHs was analyzed using a gas chromatograph coupled with a mass spectrometer (GC-MS, Agilent GC 6890, MS 5973, USA) with a HP-5MS capillary column in the electron ionization (EI) mode. | 10.1016/j.envpol.2020.115592 |

|         |                      |  |     |                              |    |    |                                                                                                                                                                                                                      |                                                                                                                                                                                                                                   |                              |
|---------|----------------------|--|-----|------------------------------|----|----|----------------------------------------------------------------------------------------------------------------------------------------------------------------------------------------------------------------------|-----------------------------------------------------------------------------------------------------------------------------------------------------------------------------------------------------------------------------------|------------------------------|
| organic | Benzo(b)fluoranthene |  | PAH | Numerical data not available | NA | ND | PAHs bounded to PM2.5 were collected on unloaded quartz fiber filters (QFFs, Tissuquartz 2500QAT-UP, PALL Corporation, USA) using a cascade impactor (PEM, SKC, PA, USA) connected to an active pump (SKC, PA, USA). | deuterated standards prior to detection. PAHs was analyzed using a gas chromatograph coupled with a mass spectrometer (GC-MS, Agilent GC 6890, MS 5973, USA) with a HP-5MS capillary column in the electron ionization (EI) mode. | 10.1016/j.envpol.2020.115592 |
| organic | Benzo(c)phenanthrene |  | PAH | Numerical data not available | NA | ND | PAHs bounded to PM2.5 were collected on unloaded quartz fiber filters (QFFs, Tissuquartz 2500QAT-UP, PALL Corporation, USA) using a cascade impactor (PEM, SKC, PA, USA) connected to an active pump (SKC, PA, USA). | deuterated standards prior to detection. PAHs was analyzed using a gas chromatograph coupled with a mass spectrometer (GC-MS, Agilent GC 6890, MS 5973, USA) with a HP-5MS capillary column in the electron ionization (EI) mode. | 10.1016/j.envpol.2020.115592 |
| organic | Benzo(e)pyrene       |  | PAH | Numerical data not available | NA | ND | PAHs bounded to PM2.5 were collected on unloaded quartz fiber filters (QFFs, Tissuquartz 2500QAT-UP, PALL Corporation, USA) using a cascade impactor (PEM, SKC, PA, USA) connected to an active pump (SKC, PA, USA). | deuterated standards prior to detection. PAHs was analyzed using a gas chromatograph coupled with a mass spectrometer (GC-MS, Agilent GC 6890, MS 5973, USA) with a HP-5MS capillary column in the electron ionization (EI) mode. | 10.1016/j.envpol.2020.115592 |

|         |                      |            |      |                              |        |                              |                                                                                                                                                                                                                      |                                                                                                                                                                                                                                   |                                 |
|---------|----------------------|------------|------|------------------------------|--------|------------------------------|----------------------------------------------------------------------------------------------------------------------------------------------------------------------------------------------------------------------|-----------------------------------------------------------------------------------------------------------------------------------------------------------------------------------------------------------------------------------|---------------------------------|
| organic | Benzo(g,h,i)perylene | six rings  | PAHs | Numerical data not available | NA     | Firepower Sweep Test (FST)   | Particle phase: Tissuquartz #2500QAT-UP; Pall Corporation; Port Washington, NY; Gas phase: PUF Replacement P226-92; SKC-West, Inc; Fullerton, CA (two inline)                                                        | Agilent 6890/5973 Inert, Agilent Technologies, Santa Clara, CA                                                                                                                                                                    | 10.1021/acs.est.8b07019         |
| organic | Benzo(g,h,i)perylene | six rings  | PAH  | Numerical data not available | NA     | ND                           | PAHs bounded to PM2.5 were collected on unloaded quartz fiber filters (QFFs, Tissuquartz 2500QAT-UP, PALL Corporation, USA) using a cascade impactor (PEM, SKC, PA, USA) connected to an active pump (SKC, PA, USA). | deuterated standards prior to detection. PAHs was analyzed using a gas chromatograph coupled with a mass spectrometer (GC-MS, Agilent GC 6890, MS 5973, USA) with a HP-5MS capillary column in the electron ionization (EI) mode. | 10.1016/j.envpol.2020.115592    |
| organic | Benzo(k)fluoranthene |            | PAH  | Numerical data not available | NA     | ND                           | PAHs bounded to PM2.5 were collected on unloaded quartz fiber filters (QFFs, Tissuquartz 2500QAT-UP, PALL Corporation, USA) using a cascade impactor (PEM, SKC, PA, USA) connected to an active pump (SKC, PA, USA). | deuterated standards prior to detection. PAHs was analyzed using a gas chromatograph coupled with a mass spectrometer (GC-MS, Agilent GC 6890, MS 5973, USA) with a HP-5MS capillary column in the electron ionization (EI) mode. | 10.1016/j.envpol.2020.115592    |
| organic | Benzo[a]anthracene   | four rings | PAHs | 20,1                         | ug g-1 | poultry cooking and grilling | 47 mm diameter quartz fibre filters                                                                                                                                                                                  | chromatography-mass spectrometry (GC-MS)                                                                                                                                                                                          | 10.1016/j.scitotenv.2021.146090 |
| organic | Benzo[a]anthracene   | four rings | PAHs | 0,194                        | ng m-3 | General cooking activities   | 66 mm diameter quartz filters                                                                                                                                                                                        | GC-MS from Agilent (Santa Clara, CA, USA) with single quadrupole                                                                                                                                                                  | 10.3390/ijerph17145275          |

|         |                      |            |       |               |                       |                                                                                      |                                                                                           |                                                                                                                                                                                                                                                                                                                                    |                                   |
|---------|----------------------|------------|-------|---------------|-----------------------|--------------------------------------------------------------------------------------|-------------------------------------------------------------------------------------------|------------------------------------------------------------------------------------------------------------------------------------------------------------------------------------------------------------------------------------------------------------------------------------------------------------------------------------|-----------------------------------|
| organic | Benzo[a]anthracene   | four rings | PAHs  | 0.02 ± 0.01   | [mg g <sup>-1</sup> ] | General cooking activities                                                           | 150 mm pure quartz microfibres filters (Fiorini, France)                                  | high-resolution gas chromatography coupled to a high-resolution mass spectrometer (HRGC/HRMS).                                                                                                                                                                                                                                     | 10.1016/j.envres.2022.113032      |
| organic | benzo[a]anthracene   | four rings | PAHs  | 9.1±11.5      | ng m <sup>-3</sup>    | seven different cuisine types                                                        | quartz-fiber filters                                                                      | solvent extraction-gas chromatography mass spectrometry (SE-GC/MS) method                                                                                                                                                                                                                                                          | 10.1016/j.chemosphere.2020.127758 |
| organic | benzo[a]fluoranthene | five rings | PAHs  | 4.6±3.2       | ng m <sup>-3</sup>    | seven different cuisine types                                                        | quartz-fiber filters                                                                      | solvent extraction-gas chromatography mass spectrometry (SE-GC/MS) method                                                                                                                                                                                                                                                          | 10.1016/j.chemosphere.2020.127758 |
| organic | Benzo[a]fluorenone   |            | OPAHs | 216.1         | pg m <sup>-3</sup>    | Hong Kong based restaurants and two simulated cooking experiments                    | Teflon-membrane (47 mm), Nuclepore polycarbonate membrane and quartz-fiber filter (47 mm) | The inorganic elements and water soluble ions were analysed by the Energy Dispersive X-ray Fluorescence Analyser (ED-XRF) and ion chromatography system, respectively. The polycyclic aromatic compounds (PACs) in the filters were extracted with organic solvents and determined by gas chromatography-mass spectrometry (GC-MS) | 10.1016/j.envpol.2021.117754      |
| organic | benzo[a]pyrene       | six rings  | PAHs  | 0.001 ± 0.000 | [mg g <sup>-1</sup> ] | sets of duplicate cooking samples were collected, using the most used 5 types of oil | quartz fiber filter (Pall-Gelman, Ann Arbor, MI, USA)                                     | gas chromatography coupled with mass spectrometry method (GC/MS, trace 2000 GC-MS, Thermo Finnigan, USA)                                                                                                                                                                                                                           | 10.1016/j.envpol.2017.04.033      |
| organic | Benzo[a]pyrene       | five rings | PAHs  | 10,7          | ug g <sup>-1</sup>    | poultry cooking and grilling                                                         | 47 mm diameter quartz fibre filters                                                       | chromatography-mass spectrometry (GC-MS)                                                                                                                                                                                                                                                                                           | 10.1016/j.scitotenv.2021.146090   |

|         |                      |            |      |               |          |                                                                                      |                                                                                           |                                                                                                                                                                                                                                                                                                                                    |                                   |
|---------|----------------------|------------|------|---------------|----------|--------------------------------------------------------------------------------------|-------------------------------------------------------------------------------------------|------------------------------------------------------------------------------------------------------------------------------------------------------------------------------------------------------------------------------------------------------------------------------------------------------------------------------------|-----------------------------------|
| organic | Benzo[a]pyrene       | five rings | PAHs | 0,668         | ng m-3   | General cooking activities                                                           | 72 mm diameter quartz filters                                                             | GC-MS from Agilent (Santa Clara, CA, USA) with single quadrupole                                                                                                                                                                                                                                                                   | 10.3390/ijerph17145281            |
| organic | Benzo[a]pyrene       | five rings | PAHs | 0.009 ± 0.005 | [mg g-1] | General cooking activities                                                           | 150 mm pure quartz microfibres filters (Fiorini, France)                                  | high-resolution gas chromatography coupled to a high-resolution mass spectrometer (HRGC/HRMS).                                                                                                                                                                                                                                     | 10.1016/j.envres.2022.113032      |
| organic | benzo[a]pyrene       | five rings | PAHs | 13.5±8.9      | ng m-3   | seven different cuisine types                                                        | quartz-fiber filters                                                                      | solvent extraction-gas chromatography mass spectrometry (SE-GC/MS) method                                                                                                                                                                                                                                                          | 10.1016/j.chemosphere.2020.127758 |
| organic | Benzo[a]pyrene       | five rings | PAHs | 135           | pg m-3   | Hong Kong based restaurants and two simulated cooking experiments                    | Teflon-membrane (47 mm), Nuclepore polycarbonate membrane and quartz-fiber filter (47 mm) | The inorganic elements and water soluble ions were analysed by the Energy Dispersive X-ray Fluorescence Analyser (ED-XRF) and ion chromatography system, respectively. The polycyclic aromatic compounds (PACs) in the filters were extracted with organic solvents and determined by gas chromatography-mass spectrometry (GC-MS) | 10.1016/j.envpol.2021.117754      |
| organic | benzo[b]fluoranthene | five rings | PAHs | 0.002 ± 0.000 | [mg g-1] | sets of duplicate cooking samples were collected, using the most used 5 types of oil | quartz fiber filter (Pall-Gelman, Ann Arbor, MI, USA)                                     | gas chromatography coupled with mass spectrometry method (GC/MS, trace 2000 GC-MS, Thermo Finnigan, USA)                                                                                                                                                                                                                           | 10.1016/j.envpol.2017.04.033      |
| organic | Benzo[b]fluoranthene | five rings | PAHs | 20,5          | ug g-1   | poultry cooking and grilling                                                         | 47 mm diameter quartz fibre filters                                                       | chromatography-mass spectrometry (GC-MS)                                                                                                                                                                                                                                                                                           | 10.1016/j.scitotenv.2021.146090   |

|         |                          |            |      |                              |          |                                                                   |                                                                                                                                                               |                                                                                                                                                                                                                                                                                                                                    |                                   |
|---------|--------------------------|------------|------|------------------------------|----------|-------------------------------------------------------------------|---------------------------------------------------------------------------------------------------------------------------------------------------------------|------------------------------------------------------------------------------------------------------------------------------------------------------------------------------------------------------------------------------------------------------------------------------------------------------------------------------------|-----------------------------------|
| organic | Benzo[b]fluoranthene     | five rings | PAHs | 0.83                         | ng m-3   | General cooking activities                                        | 68 mm diameter quartz filters                                                                                                                                 | GC-MS from Agilent (Santa Clara, CA, USA) with single quadrupole                                                                                                                                                                                                                                                                   | 10.3390/ijerph17145277            |
| organic | Benzo[b]fluoranthene     | five rings | PAHs | 0.03 ± 0.02                  | [mg g-1] | General cooking activities                                        | 150 mm pure quartz microfibres filters (Fiorini, France)                                                                                                      | high-resolution gas chromatography coupled to a high-resolution mass spectrometer (HRGC/HRMS).                                                                                                                                                                                                                                     | 10.1016/j.envres.2022.113032      |
| organic | benzo[b]fluoranthene     | five rings | PAHs | 18.8±15.3                    | ng m-3   | seven different cuisine types                                     | quartz-fiber filters                                                                                                                                          | solvent extraction-gas chromatography mass spectrometry (SE-GC/MS) method                                                                                                                                                                                                                                                          | 10.1016/j.chemosphere.2020.127758 |
| organic | Benzo[b+j+k]fluoranthene |            | PAHs | 1404.4                       | pg m-3   | Hong Kong based restaurants and two simulated cooking experiments | Teflon-membrane (47 mm), Nuclepore polycarbonate membrane and quartz-fiber filter (47 mm)                                                                     | The inorganic elements and water soluble ions were analysed by the Energy Dispersive X-ray Fluorescence Analyser (ED-XRF) and ion chromatography system, respectively. The polycyclic aromatic compounds (PACs) in the filters were extracted with organic solvents and determined by gas chromatography-mass spectrometry (GC-MS) | 10.1016/j.envpol.2021.117754      |
| organic | benzo[c]phenanthrene     | four rings | PAHs | Numerical data not available | NA       | Firepower Sweep Test (FST)                                        | Particle phase: Tissuquartz #2500QAT-UP; Pall Corporation; Port Washington, NY; Gas phase: PUF Replacement P226-92; SKC-West, Inc; Fullerton, CA (two inline) | Agilent 6890/5973 Inert, Agilent Technologies, Santa Clara, CA                                                                                                                                                                                                                                                                     | 10.1021/acs.est.8b07019           |

|         |                      |            |      |               |                       |                                                                                      |                                                                                           |                                                                                                                                                                                                                                                                                                                                    |                                   |
|---------|----------------------|------------|------|---------------|-----------------------|--------------------------------------------------------------------------------------|-------------------------------------------------------------------------------------------|------------------------------------------------------------------------------------------------------------------------------------------------------------------------------------------------------------------------------------------------------------------------------------------------------------------------------------|-----------------------------------|
| organic | benzo[e]pyrene       | six rings  | PAHs | 0.001 ± 0.000 | [mg g <sup>-1</sup> ] | sets of duplicate cooking samples were collected, using the most used 5 types of oil | quartz fiber filter (Pall-Gelman, Ann Arbor, MI, USA)                                     | gas chromatography coupled with mass spectrometry method (GC/MS, trace 2000 GC-MS, Thermo Finnigan, USA)                                                                                                                                                                                                                           | 10.1016/j.envpol.2017.04.033      |
| organic | Benzo[e]pyrene       | five rings | PAHs | 28,5          | ug g <sup>-1</sup>    | poultry cooking and grilling                                                         | 47 mm diameter quartz fibre filters                                                       | chromatography–mass spectrometry (GC–MS)                                                                                                                                                                                                                                                                                           | 10.1016/j.scitotenv.2021.146090   |
| organic | Benzo[e]pyrene       | five rings | PAHs | 0,665         | ng m <sup>-3</sup>    | General cooking activities                                                           | 71 mm diameter quartz filters                                                             | GC-MS from Agilent (Santa Clara, CA, USA) with single quadrupole                                                                                                                                                                                                                                                                   | 10.3390/ijerph17145280            |
| organic | benzo[e]pyrene       | five rings | PAHs | 10.5±6.9      | ng m <sup>-3</sup>    | seven different cuisine types                                                        | quartz-fiber filters                                                                      | solvent extraction-gas chromatography mass spectrometry (SE-GC/MS) method                                                                                                                                                                                                                                                          | 10.1016/j.chemosphere.2020.127758 |
| organic | Benzo[e]pyrene       |            | PAHs | 645.6         | pg m <sup>-3</sup>    | Hong Kong based restaurants and two simulated cooking experiments                    | Teflon-membrane (47 mm), Nuclepore polycarbonate membrane and quartz-fiber filter (47 mm) | The inorganic elements and water soluble ions were analysed by the Energy Dispersive X-ray Fluorescence Analyser (ED-XRF) and ion chromatography system, respectively. The polycyclic aromatic compounds (PACs) in the filters were extracted with organic solvents and determined by gas chromatography–mass spectrometry (GC-MS) | 10.1016/j.envpol.2021.117754      |
| organic | benzo[g,h,i]perylene | six rings  | PAHs | 0.002 ± 0.001 | [mg g <sup>-1</sup> ] | sets of duplicate cooking samples were collected, using the most used 5 types of oil | quartz fiber filter (Pall-Gelman, Ann Arbor, MI, USA)                                     | gas chromatography coupled with mass spectrometry method (GC/MS, trace 2000 GC-MS, Thermo Finnigan, USA)                                                                                                                                                                                                                           | 10.1016/j.envpol.2017.04.033      |

|         |                        |            |      |                              |        |                                                                   |                                                                                                                                                               |                                                                                                                                                                                                                                                                                                                                    |                                   |
|---------|------------------------|------------|------|------------------------------|--------|-------------------------------------------------------------------|---------------------------------------------------------------------------------------------------------------------------------------------------------------|------------------------------------------------------------------------------------------------------------------------------------------------------------------------------------------------------------------------------------------------------------------------------------------------------------------------------------|-----------------------------------|
| organic | Benzo[g,h,i]perylene   | six rings  | PAHs | 1,05                         | ng m-3 | General cooking activities                                        | 76 mm diameter quartz filters                                                                                                                                 | GC-MS from Agilent (Santa Clara, CA, USA) with single quadrupole                                                                                                                                                                                                                                                                   | 10.3390/ijerph17145285            |
| organic | benzo[ghi]fluoranthene | five rings | PAHs | Numerical data not available | NA     | Firepower Sweep Test (FST)                                        | Particle phase: Tissuquartz #2500QAT-UP; Pall Corporation; Port Washington, NY; Gas phase: PUF Replacement P226-92; SKC-West, Inc; Fullerton, CA (two inline) | Agilent 6890/5973 Inert, Agilent Technologies, Santa Clara, CA                                                                                                                                                                                                                                                                     | 10.1021/acs.est.8b07019           |
| organic | Benzo[ghi]perylene     | six rings  | PAHs | 9,5                          | ug g-1 | poultry cooking and grilling                                      | 47 mm diameter quartz fibre filters                                                                                                                           | chromatography-mass spectrometry (GC-MS)                                                                                                                                                                                                                                                                                           | 10.1016/j.scitotenv.2021.146090   |
| organic | benzo[ghi]perylene     | six rings  | PAHs | 20.3±17.2                    | ng m-3 | seven different cuisine types                                     | quartz-fiber filters                                                                                                                                          | solvent extraction-gas chromatography mass spectrometry (SE-GC/MS) method                                                                                                                                                                                                                                                          | 10.1016/j.chemosphere.2020.127758 |
| organic | Benzo[ghi]perylene     | six rings  | PAHs | 832.1                        | pg m-3 | Hong Kong based restaurants and two simulated cooking experiments | Teflon-membrane (47 mm), Nuclepore polycarbonate membrane and quartz-fiber filter (47 mm)                                                                     | The inorganic elements and water soluble ions were analysed by the Energy Dispersive X-ray Fluorescence Analyser (ED-XRF) and ion chromatography system, respectively. The polycyclic aromatic compounds (PACs) in the filters were extracted with organic solvents and determined by gas chromatography-mass spectrometry (GC-MS) | 10.1016/j.envpol.2021.117754      |

|         |                        |             |              |             |          |                                                                   |                                                                                           |                                                                                                                                                                                                                                                                                                                                    |                                   |
|---------|------------------------|-------------|--------------|-------------|----------|-------------------------------------------------------------------|-------------------------------------------------------------------------------------------|------------------------------------------------------------------------------------------------------------------------------------------------------------------------------------------------------------------------------------------------------------------------------------------------------------------------------------|-----------------------------------|
| organic | Benzo[h]quinolone      | three rings | Azaarenes    | 41.9        | pg m-3   | Hong Kong based restaurants and two simulated cooking experiments | Teflon-membrane (47 mm), Nuclepore polycarbonate membrane and quartz-fiber filter (47 mm) | The inorganic elements and water soluble ions were analysed by the Energy Dispersive X-ray Fluorescence Analyser (ED-XRF) and ion chromatography system, respectively. The polycyclic aromatic compounds (PACs) in the filters were extracted with organic solvents and determined by gas chromatography-mass spectrometry (GC-MS) | 10.1016/j.envpol.2021.117754      |
| organic | Benzo[j]fluoranthene   | five rings  | PAHs         | 1,41        | ug g-1   | poultry cooking and grilling                                      | 47 mm diameter quartz fibre filters                                                       | chromatography-mass spectrometry (GC-MS)                                                                                                                                                                                                                                                                                           | 10.1016/j.scitotenv.2021.146090   |
| organic | Benzo[k]fluoranthene   | five rings  | PAHs         | 4,75        | ug g-1   | poultry cooking and grilling                                      | 47 mm diameter quartz fibre filters                                                       | chromatography-mass spectrometry (GC-MS)                                                                                                                                                                                                                                                                                           | 10.1016/j.scitotenv.2021.146090   |
| organic | Benzo[k]fluoranthene   | five rings  | PAHs         | 0,813       | ng m-3   | General cooking activities                                        | 70 mm diameter quartz filters                                                             | GC-MS from Agilent (Santa Clara, CA, USA) with single quadrupole                                                                                                                                                                                                                                                                   | 10.3390/ijerph17145279            |
| organic | Benzo[k]fluoranthene   | five rings  | PAHs         | 0.02 ± 0.01 | [mg g-1] | General cooking activities                                        | 150 mm pure quartz microfibres filters (Fiorini, France)                                  | high-resolution gas chromatography coupled to a high-resolution mass spectrometer (HRGC/HRMS).                                                                                                                                                                                                                                     | 10.1016/j.envres.2022.113032      |
| organic | benzo[k]fluoranthene   | five rings  | PAHs         | 5.5±3.2     | ng m-3   | seven different cuisine types                                     | quartz-fiber filters                                                                      | solvent extraction-gas chromatography mass spectrometry (SE-GC/MS) method                                                                                                                                                                                                                                                          | 10.1016/j.chemosphere.2020.127758 |
| organic | Benzo[thiazole         | two rings   | Other PAHs   | 34          | ug g-1   | poultry cooking and grilling                                      | 47 mm diameter quartz fibre filters                                                       | chromatography-mass spectrometry (GC-MS)                                                                                                                                                                                                                                                                                           | 10.1016/j.scitotenv.2021.146090   |
| organic | Benzyl butyl phthalate | phthalate   | Plasticisers | 0,58        | ng m-3   | General cooking activities                                        | 51 mm diameter quartz filters                                                             | GC-MS from Agilent (Santa Clara, CA, USA) with single quadrupole                                                                                                                                                                                                                                                                   | 10.3390/ijerph17145260            |

|           |                             |                |              |                              |                       |                                                                   |                                                                                                                                                                                                                 |                                                                                                                                                                                                                                                                                                                                    |                              |
|-----------|-----------------------------|----------------|--------------|------------------------------|-----------------------|-------------------------------------------------------------------|-----------------------------------------------------------------------------------------------------------------------------------------------------------------------------------------------------------------|------------------------------------------------------------------------------------------------------------------------------------------------------------------------------------------------------------------------------------------------------------------------------------------------------------------------------------|------------------------------|
| Inorganic | Bi                          | inorganic ions | metal ions   | 0.002 ± 0.001                | [mg g <sup>-1</sup> ] | General cooking activities                                        | 150 mm pure quartz microfibres filters (Fiorini, France)                                                                                                                                                        | ICP-Mass Spectrometry (ICP-MS, Agilent 7900, United States of America)                                                                                                                                                                                                                                                             | 10.1016/j.envres.2022.113032 |
| organic   | Biphenyl                    | two rings      | PAHs         | 681.1                        | pg m <sup>-3</sup>    | Hong Kong based restaurants and two simulated cooking experiments | Teflon-membrane (47 mm), Nuclepore polycarbonate membrane and quartz-fiber filter (47 mm)                                                                                                                       | The inorganic elements and water soluble ions were analysed by the Energy Dispersive X-ray Fluorescence Analyser (ED-XRF) and ion chromatography system, respectively. The polycyclic aromatic compounds (PACs) in the filters were extracted with organic solvents and determined by gas chromatography-mass spectrometry (GC-MS) | 10.1016/j.envpol.2021.117754 |
| organic   | Bis(2-ethylhexyl) adipate   | phthalate      | Plasticisers | 7,93                         | ng m <sup>-3</sup>    | General cooking activities                                        | 52 mm diameter quartz filters                                                                                                                                                                                   | GC-MS from Agilent (Santa Clara, CA, USA) with single quadrupole                                                                                                                                                                                                                                                                   | 10.3390/ijerph17145261       |
| organic   | Bis(2-ethylhexyl) phthalate | phthalate      | Plasticisers | 29,8                         | ng m <sup>-3</sup>    | General cooking activities                                        | 53 mm diameter quartz filters                                                                                                                                                                                   | GC-MS from Agilent (Santa Clara, CA, USA) with single quadrupole                                                                                                                                                                                                                                                                   | 10.3390/ijerph17145262       |
| organic   | butanone                    | ketones        | carbonyls    | Numerical data not available | NA                    | Firepower Sweep Test (FST)                                        | Dinitrophenylhydrazine cartridge (Sep-Pak DNPH-Silica Cartridge; Waters Corp; Milford, MA) placed inline behind an ozone scrubber (Sep-Pak Ozone Scrubber Potassium Iodide Cartridge; Waters Corp; Milford, MA) | HPLC 1050 series; Agilent Technologies; Santa Clara, CA                                                                                                                                                                                                                                                                            | 10.1021/acs.est.8b07019      |

|         |                                                       |                     |            |                              |        |                              |                                                                                                                                                                                                                 |                                                                      |                                 |
|---------|-------------------------------------------------------|---------------------|------------|------------------------------|--------|------------------------------|-----------------------------------------------------------------------------------------------------------------------------------------------------------------------------------------------------------------|----------------------------------------------------------------------|---------------------------------|
| organic | butyraldehyde                                         | saturated aldehydes | carbonyls  | Numerical data not available | NA     | Firepower Sweep Test (FST)   | Dinitrophenylhydrazine cartridge (Sep-Pak DNPH-Silica Cartridge; Waters Corp; Milford, MA) placed inline behind an ozone scrubber (Sep-Pak Ozone Scrubber Potassium Iodide Cartridge; Waters Corp; Milford, MA) | HPLC 1050 series; Agilent Technologies; Santa Clara, CA              | 10.1021/acs.est.8b07019         |
| organic | c,2-butene                                            | alkenes             | VOCs       | Numerical data not available | NA     | Firepower Sweep Test (FST)   | Vacuum canister fitted with a critical orifice (CS1200ES Sampler; ENTECH Instruments, Inc.; Simi Valley, CA)                                                                                                    | Gas chromatograph mass spectrometer (GC-17A); Shimadzu; Kyoto, Japan | 10.1021/acs.est.8b07019         |
| organic | c,2-hexene                                            | alkenes             | VOCs       | Numerical data not available | NA     | Firepower Sweep Test (FST)   | Vacuum canister fitted with a critical orifice (CS1200ES Sampler; ENTECH Instruments, Inc.; Simi Valley, CA)                                                                                                    | Gas chromatograph mass spectrometer (GC-17A); Shimadzu; Kyoto, Japan | 10.1021/acs.est.8b07019         |
| organic | c,2-pentene                                           | alkenes             | VOCs       | Numerical data not available | NA     | Firepower Sweep Test (FST)   | Vacuum canister fitted with a critical orifice (CS1200ES Sampler; ENTECH Instruments, Inc.; Simi Valley, CA)                                                                                                    | Gas chromatograph mass spectrometer (GC-17A); Shimadzu; Kyoto, Japan | 10.1021/acs.est.8b07019         |
| organic | C <sub>1</sub> -chrysene                              | four rings          | Alkyl-PAHs | 92,2                         | ug g-1 | poultry cooking and grilling | 47 mm diameter quartz fibre filters                                                                                                                                                                             | chromatography-mass spectrometry (GC-MS)                             | 10.1016/j.scitotenv.2021.146090 |
| organic | C <sub>1</sub> -fluoranthenes/C <sub>1</sub> -pyrenes | four rings          | Alkyl-PAHs | 673                          | ug g-1 | poultry cooking and grilling | 47 mm diameter quartz fibre filters                                                                                                                                                                             | chromatography-mass spectrometry (GC-MS)                             | 10.1016/j.scitotenv.2021.146090 |
| organic | C <sub>1</sub> -fluorene                              | three rings         | Alkyl-PAHs | 115                          | ug g-1 | poultry cooking and grilling | 47 mm diameter quartz fibre filters                                                                                                                                                                             | chromatography-mass spectrometry (GC-MS)                             | 10.1016/j.scitotenv.2021.146090 |
| organic | C <sub>1</sub> -phenantrene                           | three rings         | Alkyl-PAHs | 541                          | ug g-1 | poultry cooking and grilling | 47 mm diameter quartz fibre filters                                                                                                                                                                             | chromatography-mass spectrometry (GC-MS)                             | 10.1016/j.scitotenv.2021.146090 |
| organic | C <sub>2</sub> -dibenzothiophene                      | three rings         | Alkyl-PAHs | 143                          | ug g-1 | poultry cooking and grilling | 47 mm diameter quartz fibre filters                                                                                                                                                                             | chromatography-mass spectrometry (GC-MS)                             | 10.1016/j.scitotenv.2021.146090 |
| organic | C <sub>2</sub> -fluorene                              | three rings         | Alkyl-PAHs | 84,4                         | ug g-1 | poultry cooking and grilling | 47 mm diameter quartz fibre filters                                                                                                                                                                             | chromatography-mass spectrometry (GC-MS)                             | 10.1016/j.scitotenv.2021.146090 |

|           |                                         |                |            |                              |          |                                                                                      |                                                          |                                                                                                                        |                                 |
|-----------|-----------------------------------------|----------------|------------|------------------------------|----------|--------------------------------------------------------------------------------------|----------------------------------------------------------|------------------------------------------------------------------------------------------------------------------------|---------------------------------|
| organic   | C <sub>2</sub> -naphthalene             | two rings      | Alkyl-PAHs | 2,4                          | ug g-1   | poultry cooking and grilling                                                         | 47 mm diameter quartz fibre filters                      | chromatography-mass spectrometry (GC-MS)                                                                               | 10.1016/j.scitotenv.2021.146090 |
| organic   | C <sub>2</sub> -phenantrene             | three rings    | Alkyl-PAHs | 304                          | ug g-1   | poultry cooking and grilling                                                         | 47 mm diameter quartz fibre filters                      | chromatography-mass spectrometry (GC-MS)                                                                               | 10.1016/j.scitotenv.2021.146090 |
| organic   | C <sub>23</sub> Tricyclic terpane       | Hopanes        |            | 33,9                         | ug g-1   | poultry cooking and grilling                                                         | 47 mm diameter quartz fibre filters                      | chromatography-mass spectrometry (GC-MS)                                                                               | 10.1016/j.scitotenv.2021.146090 |
| organic   | C <sub>24</sub> Tricyclic terpane       |                |            | 26                           | ug g-1   | poultry cooking and grilling                                                         | 47 mm diameter quartz fibre filters                      | chromatography-mass spectrometry (GC-MS)                                                                               | 10.1016/j.scitotenv.2021.146090 |
| organic   | C <sub>3</sub> -dibenzothiophene        | three rings    | Alkyl-PAHs | 190                          | ug g-1   | poultry cooking and grilling                                                         | 47 mm diameter quartz fibre filters                      | chromatography-mass spectrometry (GC-MS)                                                                               | 10.1016/j.scitotenv.2021.146090 |
| organic   | C <sub>3</sub> -fluorene                | three rings    | Alkyl-PAHs | 0,044                        | ug g-1   | poultry cooking and grilling                                                         | 47 mm diameter quartz fibre filters                      | chromatography-mass spectrometry (GC-MS)                                                                               | 10.1016/j.scitotenv.2021.146090 |
| organic   | C <sub>3</sub> -naphthalene             | two rings      | Alkyl-PAHs | 3,59                         | ug g-1   | poultry cooking and grilling                                                         | 47 mm diameter quartz fibre filters                      | chromatography-mass spectrometry (GC-MS)                                                                               | 10.1016/j.scitotenv.2021.146090 |
| organic   | C <sub>3</sub> -phenantrene             | three rings    | Alkyl-PAHs | 117                          | ug g-1   | poultry cooking and grilling                                                         | 47 mm diameter quartz fibre filters                      | chromatography-mass spectrometry (GC-MS)                                                                               | 10.1016/j.scitotenv.2021.146090 |
| organic   | C <sub>30</sub> Tricyclic terpane (22R) |                |            | 79,4                         | ug g-1   | poultry cooking and grilling                                                         | 47 mm diameter quartz fibre filters                      | chromatography-mass spectrometry (GC-MS)                                                                               | 10.1016/j.scitotenv.2021.146090 |
| organic   | C <sub>4</sub> -phenantrene             | three rings    | Alkyl-PAHs | 0,03                         | ug g-1   | poultry cooking and grilling                                                         | 47 mm diameter quartz fibre filters                      | chromatography-mass spectrometry (GC-MS)                                                                               | 10.1016/j.scitotenv.2021.146090 |
| Inorganic | Ca                                      | inorganic ions |            | Numerical data not available | NA       | Firepower Sweep Test (FST)                                                           |                                                          | CS-3000 Ion Chromatography System; Dionex; Waltham, MA                                                                 | 10.1021/acs.est.8b07019         |
| Inorganic | Ca                                      | inorganic ions |            | 1.9 ± 1.0                    | [mg g-1] | sets of duplicate cooking samples were collected, using the most used 5 types of oil |                                                          | ICP-OES, Vista-MPX, Varian Co, Palo Alta, CA, USA                                                                      | 10.1016/j.envpol.2017.04.033    |
| Inorganic | Ca                                      | inorganic ions |            | 43.8 ± 39.34                 | [mg g-1] | General cooking activities                                                           | 150 mm pure quartz microfibres filters (Florini, France) | Inductively Coupled Plasma-Atomic Emission Spectrometry (ICP-AES, iCAP 6000 series, Thermo Scientific, United Kingdom) | 10.1016/j.envres.2022.113032    |

|           |                  |                |  |           |          |                                                                   |                                                                                           |                                                                                                                                                                                                                                                                                                                                    |                              |
|-----------|------------------|----------------|--|-----------|----------|-------------------------------------------------------------------|-------------------------------------------------------------------------------------------|------------------------------------------------------------------------------------------------------------------------------------------------------------------------------------------------------------------------------------------------------------------------------------------------------------------------------------|------------------------------|
| Inorganic | Ca               | inorganic ions |  | 129       | ng m-3   | Hong Kong based restaurants and two simulated cooking experiments | Teflon-membrane (47 mm), Nuclepore polycarbonate membrane and quartz-fiber filter (47 mm) | The inorganic elements and water soluble ions were analysed by the Energy Dispersive X-ray Fluorescence Analyser (ED-XRF) and ion chromatography system, respectively. The polycyclic aromatic compounds (PACs) in the filters were extracted with organic solvents and determined by gas chromatography-mass spectrometry (GC-MS) | 10.1016/j.envpol.2021.117754 |
| Inorganic | Ca               | inorganic ions |  | 1.6       | ng m-3   | Hong Kong based restaurants and two simulated cooking experiments | Teflon-membrane (47 mm), Nuclepore polycarbonate membrane and quartz-fiber filter (47 mm) | The inorganic elements and water soluble ions were analysed by the Energy Dispersive X-ray Fluorescence Analyser (ED-XRF) and ion chromatography system, respectively. The polycyclic aromatic compounds (PACs) in the filters were extracted with organic solvents and determined by gas chromatography-mass spectrometry (GC-MS) | 10.1016/j.envpol.2021.117754 |
| Inorganic | Ca <sup>2+</sup> | inorganic ions |  | 31.8 ± 15 | [mg g-1] | General cooking activities                                        | 150 mm pure quartz microfibre filters (Florini, France)                                   | liquid ion chromatography (Dionex™ ICS-900, Thermo Scientific, United Kingdom)                                                                                                                                                                                                                                                     | 10.1016/j.envres.2022.113032 |

|           |                  |                |            |               |          |                                                                   |                                                                                           |                                                                                                                                                                                                                                                                                                                                    |                                 |
|-----------|------------------|----------------|------------|---------------|----------|-------------------------------------------------------------------|-------------------------------------------------------------------------------------------|------------------------------------------------------------------------------------------------------------------------------------------------------------------------------------------------------------------------------------------------------------------------------------------------------------------------------------|---------------------------------|
| Inorganic | Ca <sup>2+</sup> | inorganic ions |            | 0.3           | ug m-3   | Hong Kong based restaurants and two simulated cooking experiments | Teflon-membrane (47 mm), Nuclepore polycarbonate membrane and quartz-fiber filter (47 mm) | The inorganic elements and water soluble ions were analysed by the Energy Dispersive X-ray Fluorescence Analyser (ED-XRF) and ion chromatography system, respectively. The polycyclic aromatic compounds (PACs) in the filters were extracted with organic solvents and determined by gas chromatography-mass spectrometry (GC-MS) | 10.1016/j.envpol.2021.117754    |
| organic   | Carbazole        | three rings    | Other PAHs | 16,5          | ug g-1   | poultry cooking and grilling                                      | 47 mm diameter quartz fibre filters                                                       | chromatography-mass spectrometry (GC-MS)                                                                                                                                                                                                                                                                                           | 10.1016/j.scitotenv.2021.146090 |
| organic   | Carbazole        |                | Azaarenes  | 87.5          | pg m-3   | Hong Kong based restaurants and two simulated cooking experiments | Teflon-membrane (47 mm), Nuclepore polycarbonate membrane and quartz-fiber filter (47 mm) | The inorganic elements and water soluble ions were analysed by the Energy Dispersive X-ray Fluorescence Analyser (ED-XRF) and ion chromatography system, respectively. The polycyclic aromatic compounds (PACs) in the filters were extracted with organic solvents and determined by gas chromatography-mass spectrometry (GC-MS) | 10.1016/j.envpol.2021.117754    |
| Inorganic | Cd               | inorganic ions | metal ions | 0.002 ± 0.001 | [mg g-1] | General cooking activities                                        | 150 mm pure quartz microfibres filters (Fiorini, France)                                  | ICP-Mass Spectrometry (ICP-MS, Agilent 7900, United States of America)                                                                                                                                                                                                                                                             | 10.1016/j.envres.2022.113032    |

|           |             |                                                     |            |               |                       |                                                                                      |                                                                                                                               |                                                                                                          |                                   |
|-----------|-------------|-----------------------------------------------------|------------|---------------|-----------------------|--------------------------------------------------------------------------------------|-------------------------------------------------------------------------------------------------------------------------------|----------------------------------------------------------------------------------------------------------|-----------------------------------|
| Inorganic | Cd          | inorganic ions                                      | metal ions | 0.001 ± 0.000 | [mg g <sup>-1</sup> ] | sets of duplicate cooking samples were collected, using the most used 5 types of oil | 37 mm polypropylene-fiber filter (Pall-Gelman, Ann Arbor, MI, USA)                                                            | ICP-MS, Agilent 7500a, Agilent Co, Santa Clara, USA                                                      | 10.1016/j.envpol.2017.04.033      |
| Inorganic | Cd          | inorganic ions                                      | metal ions | 0,004         | ug m-3                | General cooking activities                                                           | cellulose/PTFE collection filters fitted in the cyclones of size-selective inlets of diameter 2.5 µm connected to the sampler | ICP-OES (8300 Perkin Elmer, USA)                                                                         | 10.1007/s42452-020-03800-0        |
| Inorganic | Ce          | inorganic ions                                      | metal ions | 0.03 ± 0.02   | [mg g <sup>-1</sup> ] | General cooking activities                                                           | 150 mm pure quartz microfibre filters (Fiorini, France)                                                                       | ICP-Mass Spectrometry (ICP-MS, Agilent 7900, United States of America)                                   | 10.1016/j.envres.2022.113032      |
| organic   | Cholesterol | Alcohols, sterols and other compounds with OH group |            | 0,979         | ug g-1                | poultry cooking and grilling                                                         | 47 mm diameter quartz fibre filters                                                                                           | chromatography–mass spectrometry (GC–MS)                                                                 | 10.1016/j.scitotenv.2021.146090   |
| organic   | cholesterol | Alcohols, sterols and other compounds with OH group |            | 260.8±117.1   | ng m-3                | seven different cuisine types                                                        | quartz-fiber filters                                                                                                          | solvent extraction-gas chromatography mass spectrometry (SE-GC/MS) method                                | 10.1016/j.chemosphere.2020.127758 |
| organic   | chrysene    | four rings                                          | PAHs       | 0.001 ± 0.000 | [mg g <sup>-1</sup> ] | sets of duplicate cooking samples were collected, using the most used 5 types of oil | quartz fiber filter (Pall-Gelman, Ann Arbor, MI, USA)                                                                         | gas chromatography coupled with mass spectrometry method (GC/MS, trace 2000 GC-MS, Thermo Finnigan, USA) | 10.1016/j.envpol.2017.04.033      |
| organic   | Chrysene    | four rings                                          | PAHs       | 37,9          | ug g-1                | poultry cooking and grilling                                                         | 47 mm diameter quartz fibre filters                                                                                           | chromatography–mass spectrometry (GC–MS)                                                                 | 10.1016/j.scitotenv.2021.146090   |

|         |                           |            |      |                              |          |                               |                                                                                                                                                                                                                      |                                                                                                                                                                                                                                   |                                   |
|---------|---------------------------|------------|------|------------------------------|----------|-------------------------------|----------------------------------------------------------------------------------------------------------------------------------------------------------------------------------------------------------------------|-----------------------------------------------------------------------------------------------------------------------------------------------------------------------------------------------------------------------------------|-----------------------------------|
| organic | Chrysene                  |            | PAH  | Numerical data not available | NA       | ND                            | PAHs bounded to PM2.5 were collected on unloaded quartz fiber filters (QFFs, Tissuquartz 2500QAT-UP, PALL Corporation, USA) using a cascade impactor (PEM, SKC, PA, USA) connected to an active pump (SKC, PA, USA). | deuterated standards prior to detection. PAHs was analyzed using a gas chromatograph coupled with a mass spectrometer (GC-MS, Agilent GC 6890, MS 5973, USA) with a HP-5MS capillary column in the electron ionization (EI) mode. | 10.1016/j.envpol.2020.115592      |
| organic | Chrysene                  | four rings | PAHs | 0,33                         | ng m-3   | General cooking activities    | 67 mm diameter quartz filters                                                                                                                                                                                        | GC-MS from Agilent (Santa Clara, CA, USA) with single quadrupole                                                                                                                                                                  | 10.3390/ijerph17145276            |
| organic | Chrysene                  | four rings | PAHs | 0.02 ± 0.01                  | [mg g-1] | General cooking activities    | 150 mm pure quartz microfibres filters (Fiorini, France)                                                                                                                                                             | high-resolution gas chromatography coupled to a high-resolution mass spectrometer (HRGC/HRMS).                                                                                                                                    | 10.1016/j.envres.2022.113032      |
| organic | chrysene                  | four rings | PAHs | 11.1±6.6                     | ng m-3   | seven different cuisine types | quartz-fiber filters                                                                                                                                                                                                 | solvent extraction-gas chromatography mass spectrometry (SE-GC/MS) method                                                                                                                                                         | 10.1016/j.chemosphere.2020.127758 |
| organic | chrysene and triphenylene | four rings | PAHs | Numerical data not available | NA       | Firepower Sweep Test (FST)    | Particle phase: Tissuquartz #2500QAT-UP; Pall Corporation; Port Washington, NY; Gas phase: PUF Replacement P226-92; SKC-West, Inc; Fullerton, CA (two inline)                                                        | Agilent 6890/5973 Inert, Agilent Technologies, Santa Clara, CA                                                                                                                                                                    | 10.1021/acs.est.8b07019           |

|           |                           |                |      |                              |          |                                                                                      |                                                                                           |                                                                                                                                                                                                                                                                                                                                    |                              |
|-----------|---------------------------|----------------|------|------------------------------|----------|--------------------------------------------------------------------------------------|-------------------------------------------------------------------------------------------|------------------------------------------------------------------------------------------------------------------------------------------------------------------------------------------------------------------------------------------------------------------------------------------------------------------------------------|------------------------------|
| organic   | Chrysene and Triphenylene |                | PAHs | 551.1                        | pg m-3   | Hong Kong based restaurants and two simulated cooking experiments                    | Teflon-membrane (47 mm), Nuclepore polycarbonate membrane and quartz-fiber filter (47 mm) | The inorganic elements and water soluble ions were analysed by the Energy Dispersive X-ray Fluorescence Analyser (ED-XRF) and ion chromatography system, respectively. The polycyclic aromatic compounds (PACs) in the filters were extracted with organic solvents and determined by gas chromatography-mass spectrometry (GC-MS) | 10.1016/j.envpol.2021.117754 |
| Inorganic | Cl                        | inorganic ions |      | Numerical data not available | NA       | Firepower Sweep Test (FST)                                                           |                                                                                           | DX-500 Ion Chromatography System; Dionex; Waltham, MA                                                                                                                                                                                                                                                                              | 10.1021/acs.est.8b07019      |
| Inorganic | Cl                        | inorganic ions |      | 0.25 ± 0.08                  | [mg g-1] | sets of duplicate cooking samples were collected, using the most used 5 types of oil |                                                                                           | ion chromatograph method (DX-120, Dionex Ltd., Sunnyvale, CA, USA)                                                                                                                                                                                                                                                                 | 10.1016/j.envpol.2017.04.033 |

|           |                 |                |  |        |          |                                                                   |                                                                                           |                                                                                                                                                                                                                                                                                                                                    |                              |
|-----------|-----------------|----------------|--|--------|----------|-------------------------------------------------------------------|-------------------------------------------------------------------------------------------|------------------------------------------------------------------------------------------------------------------------------------------------------------------------------------------------------------------------------------------------------------------------------------------------------------------------------------|------------------------------|
| Inorganic | Cl              | inorganic ions |  | 2882.9 | ng m-3   | Hong Kong based restaurants and two simulated cooking experiments | Teflon-membrane (47 mm), Nuclepore polycarbonate membrane and quartz-fiber filter (47 mm) | The inorganic elements and water soluble ions were analysed by the Energy Dispersive X-ray Fluorescence Analyser (ED-XRF) and ion chromatography system, respectively. The polycyclic aromatic compounds (PACs) in the filters were extracted with organic solvents and determined by gas chromatography-mass spectrometry (GC-MS) | 10.1016/j.envpol.2021.117754 |
| Inorganic | Cl <sup>-</sup> | inorganic ions |  | 12,1   | [mg g-1] | General cooking activities                                        | 150 mm pure quartz microfibre filters (Fiorini, France)                                   | liquid ion chromatography (Dionex™ ICS-900, Thermo Scientific, United Kingdom)                                                                                                                                                                                                                                                     | 10.1016/j.envres.2022.113032 |
| Inorganic | Cl <sup>-</sup> | inorganic ions |  | 3.0    | ug m-3   | Hong Kong based restaurants and two simulated cooking experiments | Teflon-membrane (47 mm), Nuclepore polycarbonate membrane and quartz-fiber filter (47 mm) | The inorganic elements and water soluble ions were analysed by the Energy Dispersive X-ray Fluorescence Analyser (ED-XRF) and ion chromatography system, respectively. The polycyclic aromatic compounds (PACs) in the filters were extracted with organic solvents and determined by gas chromatography-mass spectrometry (GC-MS) | 10.1016/j.envpol.2021.117754 |

|           |          |                |            |                              |                       |                                                                   |                                                                                                                                                                                                                      |                                                                                                                                                                                                                                                                                                                                    |                                   |
|-----------|----------|----------------|------------|------------------------------|-----------------------|-------------------------------------------------------------------|----------------------------------------------------------------------------------------------------------------------------------------------------------------------------------------------------------------------|------------------------------------------------------------------------------------------------------------------------------------------------------------------------------------------------------------------------------------------------------------------------------------------------------------------------------------|-----------------------------------|
| Inorganic | Co       | inorganic ions | metal ions | 0.007 ± 0.006                | [mg g <sup>-1</sup> ] | General cooking activities                                        | 150 mm pure quartz microfibre filters (Fiorini, France)                                                                                                                                                              | ICP-Mass Spectrometry (ICP-MS, Agilent 7900, United States of America)                                                                                                                                                                                                                                                             | 10.1016/j.envres.2022.113032      |
| organic   | Coronene |                | PAH        | Numerical data not available | NA                    | ND                                                                | PAHs bounded to PM2.5 were collected on unloaded quartz fiber filters (QFFs, Tissuquartz 2500QAT-UP, PALL Corporation, USA) using a cascade impactor (PEM, SKC, PA, USA) connected to an active pump (SKC, PA, USA). | deuterated standards prior to detection. PAHs was analyzed using a gas chromatograph coupled with a mass spectrometer (GC-MS, Agilent GC 6890, MS 5973, USA) with a HP-5MS capillary column in the electron ionization (EI) mode.                                                                                                  | 10.1016/j.envpol.2020.115592      |
| organic   | coronene | seven rings    | PAHs       | 19.3±16.6                    | ng m <sup>-3</sup>    | seven different cuisine types                                     | quartz-fiber filters                                                                                                                                                                                                 | solvent extraction-gas chromatography mass spectrometry (SE-GC/MS) method                                                                                                                                                                                                                                                          | 10.1016/j.chemosphere.2020.127758 |
| organic   | Coronene |                | PAHs       | 675.5                        | pg m <sup>-3</sup>    | Hong Kong based restaurants and two simulated cooking experiments | Teflon-membrane (47 mm), Nuclepore polycarbonate membrane and quartz-fiber filter (47 mm)                                                                                                                            | The inorganic elements and water soluble ions were analysed by the Energy Dispersive X-ray Fluorescence Analyser (ED-XRF) and ion chromatography system, respectively. The polycyclic aromatic compounds (PACs) in the filters were extracted with organic solvents and determined by gas chromatography-mass spectrometry (GC-MS) | 10.1016/j.envpol.2021.117754      |
| Inorganic | Cr       | inorganic ions | metal ions | 0.064 ± 0.019                | [mg g <sup>-1</sup> ] | sets of duplicate cooking samples were collected, using the       | 37 mm polypropylene-fiber filter (Pall-Gelman, Ann Arbor, MI, USA)                                                                                                                                                   | ICP-MS, Agilent 7500a, Agilent Co, Santa Clara, USA                                                                                                                                                                                                                                                                                | 10.1016/j.envpol.2017.04.033      |

|           |                |                       |            |                              |          |                                                                   |                                                                                                                                                                                                                 |                                                                                                                                                                                                                                                                                                                                    |                              |
|-----------|----------------|-----------------------|------------|------------------------------|----------|-------------------------------------------------------------------|-----------------------------------------------------------------------------------------------------------------------------------------------------------------------------------------------------------------|------------------------------------------------------------------------------------------------------------------------------------------------------------------------------------------------------------------------------------------------------------------------------------------------------------------------------------|------------------------------|
|           |                |                       |            |                              |          | most used 5 types of oil                                          |                                                                                                                                                                                                                 |                                                                                                                                                                                                                                                                                                                                    |                              |
| Inorganic | Cr             | inorganic ions        | metal ions | 0,092                        | ug m-3   | General cooking activities                                        | cellulose/PTFE collection filters fitted in the cyclones of size-selective inlets of diameter 2.5 µm connected to the sampler                                                                                   | ICP-OES (8300 Perkin Elmer, USA)                                                                                                                                                                                                                                                                                                   | 10.1007/s42452-020-03800-0   |
| Inorganic | Cr             | inorganic ions        | metal ions | 7.6                          | ng m-3   | Hong Kong based restaurants and two simulated cooking experiments | Teflon-membrane (47 mm), Nuclepore polycarbonate membrane and quartz-fiber filter (47 mm)                                                                                                                       | The inorganic elements and water soluble ions were analysed by the Energy Dispersive X-ray Fluorescence Analyser (ED-XRF) and ion chromatography system, respectively. The polycyclic aromatic compounds (PACs) in the filters were extracted with organic solvents and determined by gas chromatography-mass spectrometry (GC-MS) | 10.1016/j.envpol.2021.117754 |
| organic   | crotonaldehyde | unsaturated aldehydes | carbonyls  | Numerical data not available | NA       | Firepower Sweep Test (FST)                                        | Dinitrophenylhydrazine cartridge (Sep-Pak DNPH-Silica Cartridge; Waters Corp; Milford, MA) placed inline behind an ozone scrubber (Sep-Pak Ozone Scrubber Potassium Iodide Cartridge; Waters Corp; Milford, MA) | HPLC 1050 series; Agilent Technologies; Santa Clara, CA                                                                                                                                                                                                                                                                            | 10.1021/acs.est.8b07019      |
| Inorganic | Cu             | inorganic ions        | metal ions | 0.10 ± 0.06                  | [mg g-1] | General cooking activities                                        | 150 mm pure quartz microfibre filters (Fiorini, France)                                                                                                                                                         | ICP-Mass Spectrometry (ICP-MS, Agilent 7900, United States of America)                                                                                                                                                                                                                                                             | 10.1016/j.envres.2022.113032 |

|           |             |                |            |                              |          |                                                                                      |                                                                                                                               |                                                                                                                                                                                                                                                                                                                                    |                              |
|-----------|-------------|----------------|------------|------------------------------|----------|--------------------------------------------------------------------------------------|-------------------------------------------------------------------------------------------------------------------------------|------------------------------------------------------------------------------------------------------------------------------------------------------------------------------------------------------------------------------------------------------------------------------------------------------------------------------------|------------------------------|
| Inorganic | Cu          | inorganic ions | metal ions | 0.014 ± 0.006                | [mg g-1] | sets of duplicate cooking samples were collected, using the most used 5 types of oil | 37 mm polypropylene-fiber filter (Pall-Gelman, Ann Arbor, MI, USA)                                                            | ICP-MS, Agilent 7500a, Agilent Co, Santa Clara, USA                                                                                                                                                                                                                                                                                | 10.1016/j.envpol.2017.04.033 |
| Inorganic | Cu          | inorganic ions | metal ions | 0,188                        | ug m-3   | General cooking activities                                                           | cellulose/PTFE collection filters fitted in the cyclones of size-selective inlets of diameter 2.5 µm connected to the sampler | ICP-OES (8300 Perkin Elmer, USA)                                                                                                                                                                                                                                                                                                   | 10.1007/s42452-020-03800-0   |
| Inorganic | Cu          | inorganic ions | metal ions | 28.1                         | ng m-3   | Hong Kong based restaurants and two simulated cooking experiments                    | Teflon-membrane (47 mm), Nuclepore polycarbonate membrane and quartz-fiber filter (47 mm)                                     | The inorganic elements and water soluble ions were analysed by the Energy Dispersive X-ray Fluorescence Analyser (ED-XRF) and ion chromatography system, respectively. The polycyclic aromatic compounds (PACs) in the filters were extracted with organic solvents and determined by gas chromatography-mass spectrometry (GC-MS) | 10.1016/j.envpol.2021.117754 |
| organic   | cyclohexane | aromatics      | VOCs       | Numerical data not available | NA       | Firepower Sweep Test (FST)                                                           | Vacuum canister fitted with a critical orifice (CS1200ES Sampler; ENTECH Instruments, Inc.; Simi Valley, CA)                  | Gas chromatograph mass spectrometer (GC-17A); Shimadzu; Kyoto, Japan                                                                                                                                                                                                                                                               | 10.1021/acs.est.8b07019      |

|         |                       |            |      |                              |        |                              |                                                                                                                                                                                                                      |                                                                                                                                                                                                                                   |                                 |
|---------|-----------------------|------------|------|------------------------------|--------|------------------------------|----------------------------------------------------------------------------------------------------------------------------------------------------------------------------------------------------------------------|-----------------------------------------------------------------------------------------------------------------------------------------------------------------------------------------------------------------------------------|---------------------------------|
| organic | Cyclopenta(c,d)pyrene | five rings | PAH  | Numerical data not available | NA     | ND                           | PAHs bounded to PM2.5 were collected on unloaded quartz fiber filters (QFFs, Tissuquartz 2500QAT-UP, PALL Corporation, USA) using a cascade impactor (PEM, SKC, PA, USA) connected to an active pump (SKC, PA, USA). | deuterated standards prior to detection. PAHs was analyzed using a gas chromatograph coupled with a mass spectrometer (GC-MS, Agilent GC 6890, MS 5973, USA) with a HP-5MS capillary column in the electron ionization (EI) mode. | 10.1016/j.envpol.2020.115592    |
| organic | cyclopenta[cd]pyrene  | five rings | PAHs | Numerical data not available | NA     | Firepower Sweep Test (FST)   | Particle phase: Tissuquartz #2500QAT-UP; Pall Corporation; Port Washington, NY; Gas phase: PUF Replacement P226-92; SKC-West, Inc; Fullerton, CA (two inline)                                                        | Agilent 6890/5973 Inert, Agilent Technologies, Santa Clara, CA                                                                                                                                                                    | 10.1021/acs.est.8b07019         |
| organic | Cyclopenta[cd]pyrene  | five rings | PAHs | 3,02                         | ug g-1 | poultry cooking and grilling | 47 mm diameter quartz fibre filters                                                                                                                                                                                  | chromatography-mass spectrometry (GC-MS)                                                                                                                                                                                          | 10.1016/j.scitotenv.2021.146090 |
| organic | cyclopentane          | aromatics  | VOCs | Numerical data not available | NA     | Firepower Sweep Test (FST)   | Vacuum canister fitted with a critical orifice (CS1200ES Sampler; ENTECH Instruments, Inc.; Simi Valley, CA)                                                                                                         | Gas chromatograph mass spectrometer (GC-17A); Shimadzu; Kyoto, Japan                                                                                                                                                              | 10.1021/acs.est.8b07019         |

|         |                                  |                                                     |              |                              |        |                                                                   |                                                                                                                                                                                                                                  |                                                                                                                                                                                                                                                                                                                                    |                                   |
|---------|----------------------------------|-----------------------------------------------------|--------------|------------------------------|--------|-------------------------------------------------------------------|----------------------------------------------------------------------------------------------------------------------------------------------------------------------------------------------------------------------------------|------------------------------------------------------------------------------------------------------------------------------------------------------------------------------------------------------------------------------------------------------------------------------------------------------------------------------------|-----------------------------------|
| organic | Decaldehyde (C <sub>10</sub> )   |                                                     | Carbonyls    |                              | pg m-3 | Hong Kong based restaurants and two simulated cooking experiments | Teflon-membrane (47 mm), Nuclepore polycarbonate membrane and quartz-fiber filter (47 mm)                                                                                                                                        | The inorganic elements and water soluble ions were analysed by the Energy Dispersive X-ray Fluorescence Analyser (ED-XRF) and ion chromatography system, respectively. The polycyclic aromatic compounds (PACs) in the filters were extracted with organic solvents and determined by gas chromatography-mass spectrometry (GC-MS) | 10.1016/j.envpol.2021.117754      |
| organic | decanoic acid (C <sub>10</sub> ) | saturated fatty acids                               |              | 87.2±84.3                    | ng m-3 | seven different cuisine types                                     | quartz-fiber filters                                                                                                                                                                                                             | solvent extraction-gas chromatography mass spectrometry (SE-GC/MS) method                                                                                                                                                                                                                                                          | 10.1016/j.chemosphere.2020.127758 |
| organic | Decanol                          | Alcohols, sterols and other compounds with OH group |              | 0,651                        | ug g-1 | poultry cooking and grilling                                      | 47 mm diameter quartz fibre filters                                                                                                                                                                                              | chromatography-mass spectrometry (GC-MS)                                                                                                                                                                                                                                                                                           | 10.1016/j.scitotenv.2021.146090   |
| organic | Dehydroabietic acid              | carboxylic acids                                    |              | 0,121                        | ug g-1 | poultry cooking and grilling                                      | 47 mm diameter quartz fibre filters                                                                                                                                                                                              | chromatography-mass spectrometry (GC-MS)                                                                                                                                                                                                                                                                                           | 10.1016/j.scitotenv.2021.146090   |
| organic | Di-benzo[a,h]pyrene              | six rings                                           | PAH          | Numerical data not available | NA     | ND                                                                | PAHs bounded to PM <sub>2.5</sub> were collected on unloaded quartz fiber filters (QFFs, Tissuquartz 2500QAT-UP, PALL Corporation, USA) using a cascade impactor (PEM, SKC, PA, USA) connected to an active pump (SKC, PA, USA). | deuterated standards prior to detection. PAHs was analyzed using a gas chromatograph coupled with a mass spectrometer (GC-MS, Agilent GC 6890, MS 5973, USA) with a HP-5MS capillary column in the electron ionization (EI) mode.                                                                                                  | 10.1016/j.envpol.2020.115592      |
| organic | Di-n-butyl phthalate             | phthalate                                           | Plasticisers | 56,8                         | ng m-3 | General cooking activities                                        | 50 mm diameter quartz filters                                                                                                                                                                                                    | GC-MS from Agilent (Santa Clara, CA, USA) with single quadrupole                                                                                                                                                                                                                                                                   | 10.3390/ijerph17145259            |

|         |                       |            |              |                              |        |                                                                   |                                                                                                                                                                                                                      |                                                                                                                                                                                                                                                                                                                                    |                              |
|---------|-----------------------|------------|--------------|------------------------------|--------|-------------------------------------------------------------------|----------------------------------------------------------------------------------------------------------------------------------------------------------------------------------------------------------------------|------------------------------------------------------------------------------------------------------------------------------------------------------------------------------------------------------------------------------------------------------------------------------------------------------------------------------------|------------------------------|
| organic | Di-n-octyl phthalate  | phthalate  | Plasticisers | 2.95                         | ng m-3 | General cooking activities                                        | 54 mm diameter quartz filters                                                                                                                                                                                        | GC-MS from Agilent (Santa Clara, CA, USA) with single quadrupole                                                                                                                                                                                                                                                                   | 10.3390/ijerph17145263       |
| organic | Dibenz(ah)anthracene  | five rings | PAH          | Numerical data not available | NA     | ND                                                                | PAHs bounded to PM2.5 were collected on unloaded quartz fiber filters (QFFs, Tissuquartz 2500QAT-UP, PALL Corporation, USA) using a cascade impactor (PEM, SKC, PA, USA) connected to an active pump (SKC, PA, USA). | deuterated standards prior to detection. PAHs was analyzed using a gas chromatograph coupled with a mass spectrometer (GC-MS, Agilent GC 6890, MS 5973, USA) with a HP-5MS capillary column in the electron ionization (EI) mode.                                                                                                  | 10.1016/j.envpol.2020.115592 |
| organic | Dibenz[a,h]anthracene | five rings | PAHs         | 127.2                        | pg m-3 | Hong Kong based restaurants and two simulated cooking experiments | Teflon-membrane (47 mm), Nuclepore polycarbonate membrane and quartz-fiber filter (47 mm)                                                                                                                            | The inorganic elements and water soluble ions were analysed by the Energy Dispersive X-ray Fluorescence Analyser (ED-XRF) and ion chromatography system, respectively. The polycyclic aromatic compounds (PACs) in the filters were extracted with organic solvents and determined by gas chromatography-mass spectrometry (GC-MS) | 10.1016/j.envpol.2021.117754 |

|         |                          |           |     |                              |    |    |                                                                                                                                                                                                                      |                                                                                                                                                                                                                                   |                              |
|---------|--------------------------|-----------|-----|------------------------------|----|----|----------------------------------------------------------------------------------------------------------------------------------------------------------------------------------------------------------------------|-----------------------------------------------------------------------------------------------------------------------------------------------------------------------------------------------------------------------------------|------------------------------|
| organic | Dibenzo (a,l)pyrene      | six rings | PAH | Numerical data not available | NA | ND | PAHs bounded to PM2.5 were collected on unloaded quartz fiber filters (QFFs, Tissuquartz 2500QAT-UP, PALL Corporation, USA) using a cascade impactor (PEM, SKC, PA, USA) connected to an active pump (SKC, PA, USA). | deuterated standards prior to detection. PAHs was analyzed using a gas chromatograph coupled with a mass spectrometer (GC-MS, Agilent GC 6890, MS 5973, USA) with a HP-5MS capillary column in the electron ionization (EI) mode. | 10.1016/j.envpol.2020.115592 |
| organic | Dibenzo(a,e)fluoranthene | six rings | PAH | Numerical data not available | NA | ND | PAHs bounded to PM2.5 were collected on unloaded quartz fiber filters (QFFs, Tissuquartz 2500QAT-UP, PALL Corporation, USA) using a cascade impactor (PEM, SKC, PA, USA) connected to an active pump (SKC, PA, USA). | deuterated standards prior to detection. PAHs was analyzed using a gas chromatograph coupled with a mass spectrometer (GC-MS, Agilent GC 6890, MS 5973, USA) with a HP-5MS capillary column in the electron ionization (EI) mode. | 10.1016/j.envpol.2020.115592 |
| organic | Dibenzo(a,e)pyrene       | six rings | PAH | Numerical data not available | NA | ND | PAHs bounded to PM2.5 were collected on unloaded quartz fiber filters (QFFs, Tissuquartz 2500QAT-UP, PALL Corporation, USA) using a cascade impactor (PEM, SKC, PA, USA) connected to an active pump (SKC, PA, USA). | deuterated standards prior to detection. PAHs was analyzed using a gas chromatograph coupled with a mass spectrometer (GC-MS, Agilent GC 6890, MS 5973, USA) with a HP-5MS capillary column in the electron ionization (EI) mode. | 10.1016/j.envpol.2020.115592 |

|         |                                        |             |              |                              |        |                               |                                                                                                                                                                                                                      |                                                                                                                                                                                                                                   |                                   |
|---------|----------------------------------------|-------------|--------------|------------------------------|--------|-------------------------------|----------------------------------------------------------------------------------------------------------------------------------------------------------------------------------------------------------------------|-----------------------------------------------------------------------------------------------------------------------------------------------------------------------------------------------------------------------------------|-----------------------------------|
| organic | Dibenzo(a,i)pyrene                     | six rings   | PAH          | Numerical data not available | NA     | ND                            | PAHs bounded to PM2.5 were collected on unloaded quartz fiber filters (QFFs, Tissuquartz 2500QAT-UP, PALL Corporation, USA) using a cascade impactor (PEM, SKC, PA, USA) connected to an active pump (SKC, PA, USA). | deuterated standards prior to detection. PAHs was analyzed using a gas chromatograph coupled with a mass spectrometer (GC-MS, Agilent GC 6890, MS 5973, USA) with a HP-5MS capillary column in the electron ionization (EI) mode. | 10.1016/j.envpol.2020.115592      |
| organic | dibenzo(ah)anthracene elemental carbon | five rings  | PAHs         | Numerical data not available | NA     | Firepower Sweep Test (FST)    | Particle phase: Tissuquartz #2500QAT-UP; Pall Corporation; Port Washington, NY; Gas phase: PUF Replacement P226-92; SKC-West, Inc; Fullerton, CA (two inline)                                                        | Agilent 6890/5973 Inert, Agilent Technologies, Santa Clara, CA                                                                                                                                                                    | 10.1021/acs.est.8b07019           |
| organic | Dibenzo[a,h]anthracene                 | five rings  | PAHs         | 1,34                         | ug g-1 | poultry cooking and grilling  | 47 mm diameter quartz fibre filters                                                                                                                                                                                  | chromatography-mass spectrometry (GC-MS)                                                                                                                                                                                          | 10.1016/j.scitotenv.2021.146090   |
| organic | Dibenzo[a,h]anthracene                 | five rings  | PAHs         | 0,122                        | ng m-3 | General cooking activities    | 75 mm diameter quartz filters                                                                                                                                                                                        | GC-MS from Agilent (Santa Clara, CA, USA) with single quadrupole                                                                                                                                                                  | 10.3390/ijerph17145284            |
| organic | dibenzo[a,h]anthracene                 | five rings  | PAHs         | 7.6±2.4                      | ng m-3 | seven different cuisine types | quartz-fiber filters                                                                                                                                                                                                 | solvent extraction-gas chromatography mass spectrometry (SE-GC/MS) method                                                                                                                                                         | 10.1016/j.chemosphere.2020.127758 |
| organic | Dibenzothiophene                       | three rings | Other PAHs   | 0,531                        | ug g-1 | poultry cooking and grilling  | 47 mm diameter quartz fibre filters                                                                                                                                                                                  | chromatography-mass spectrometry (GC-MS)                                                                                                                                                                                          | 10.1016/j.scitotenv.2021.146090   |
| organic | Diethyl phthalate                      | phthalate   | Plasticisers | 8,87                         | ng m-3 | General cooking activities    | 48 mm diameter quartz filters                                                                                                                                                                                        | GC-MS from Agilent (Santa Clara, CA, USA) with single quadrupole                                                                                                                                                                  | 10.3390/ijerph17145257            |
| organic | Diisobutyl phthalate                   | phthalate   | Plasticisers | 76,5                         | ng m-3 | General cooking activities    | 49 mm diameter quartz filters                                                                                                                                                                                        | GC-MS from Agilent (Santa Clara, CA, USA) with single quadrupole                                                                                                                                                                  | 10.3390/ijerph17145258            |

|         |                                    |                                                     |              |             |          |                               |                                                          |                                                                                                |                                   |
|---------|------------------------------------|-----------------------------------------------------|--------------|-------------|----------|-------------------------------|----------------------------------------------------------|------------------------------------------------------------------------------------------------|-----------------------------------|
| organic | Diisononyl phthalate               | phthalate                                           | Plasticisers | 1,31        | ng m-3   | General cooking activities    | 55 mm diameter quartz filters                            | GC-MS from Agilent (Santa Clara, CA, USA) with single quadrupole                               | 10.3390/ijerph17145264            |
| organic | Dimethyl phthalate                 | phthalate                                           | Plasticisers | 0,916       | ng m-3   | General cooking activities    | 47 mm diameter quartz filters                            | GC-MS from Agilent (Santa Clara, CA, USA) with single quadrupole                               | 10.3390/ijerph17145256            |
| organic | Docosane                           | alcanes                                             |              | 0.40 ± 0.14 | [mg g-1] | General cooking activities    | 150 mm pure quartz microfibres filters (Fiorini, France) | high-resolution gas chromatography coupled to a high-resolution mass spectrometer (HRGC/HRMS). | 10.1016/j.envres.2022.113032      |
| organic | docosane (n-C <sub>22</sub> )      | alcanes                                             |              | 24.8±14.1   | ng m-3   | seven different cuisine types | quartz-fiber filters                                     | solvent extraction-gas chromatography mass spectrometry (SE-GC/MS) method                      | 10.1016/j.chemosphere.2020.127758 |
| organic | docosanoic acid (C <sub>22</sub> ) | carboxylic acids                                    |              | 27.8 ± 12.8 | [mg g-1] | General cooking activities    | 150 mm pure quartz microfibres filters (Fiorini, France) | high-resolution gas chromatography coupled to a high-resolution mass spectrometer (HRGC/HRMS). | 10.1016/j.envres.2022.113032      |
| organic | docosanoic acid (C <sub>22</sub> ) | saturated fatty acids                               |              | 137.4±111.5 | ng m-3   | seven different cuisine types | quartz-fiber filters                                     | solvent extraction-gas chromatography mass spectrometry (SE-GC/MS) method                      | 10.1016/j.chemosphere.2020.127758 |
| organic | Docosanol                          | Alcohols, sterols and other compounds with OH group |              | 0,038       | ug g-1   | poultry cooking and grilling  | 47 mm diameter quartz fibre filters                      | chromatography–mass spectrometry (GC–MS)                                                       | 10.1016/j.scitotenv.2021.146090   |
| organic | dodecanoic acid (C <sub>12</sub> ) | carboxylic acids                                    |              | 4.42 ± 4.18 | [mg g-1] | General cooking activities    | 150 mm pure quartz microfibres filters (Fiorini, France) | high-resolution gas chromatography coupled to a high-resolution mass spectrometer (HRGC/HRMS). | 10.1016/j.envres.2022.113032      |
| organic | dodecanoic acid (C <sub>12</sub> ) | saturated fatty acids                               |              | 239.4±266.8 | ng m-3   | seven different cuisine types | quartz-fiber filters                                     | solvent extraction-gas chromatography mass spectrometry (SE-GC/MS) method                      | 10.1016/j.chemosphere.2020.127758 |

|         |                                    |                       |      |                              |                       |                               |                                                                                                              |                                                                                                |                                   |
|---------|------------------------------------|-----------------------|------|------------------------------|-----------------------|-------------------------------|--------------------------------------------------------------------------------------------------------------|------------------------------------------------------------------------------------------------|-----------------------------------|
| organic | dotriacontane (n-C <sub>32</sub> ) | alkanes               |      | 0.46 ± 0.32                  | [mg g <sup>-1</sup> ] | General cooking activities    | 150 mm pure quartz microfibres filters (Fiorini, France)                                                     | high-resolution gas chromatography coupled to a high-resolution mass spectrometer (HRGC/HRMS). | 10.1016/j.envres.2022.113032      |
| organic | dotriacontane (n-C <sub>32</sub> ) | alkanes               |      | 11.0±9.2                     | ng m <sup>-3</sup>    | seven different cuisine types | quartz-fiber filters                                                                                         | solvent extraction-gas chromatography mass spectrometry (SE-GC/MS) method                      | 10.1016/j.chemosphere.2020.127758 |
| organic | Eicosane                           | alkanes               |      | 0.15 ± 0.13                  | [mg g <sup>-1</sup> ] | General cooking activities    | 150 mm pure quartz microfibres filters (Fiorini, France)                                                     | high-resolution gas chromatography coupled to a high-resolution mass spectrometer (HRGC/HRMS). | 10.1016/j.envres.2022.113032      |
| organic | eicosanoic acid (C <sub>20</sub> ) | carboxylic acids      |      | 7.9 ± 2.6                    | [mg g <sup>-1</sup> ] | General cooking activities    | 150 mm pure quartz microfibres filters (Fiorini, France)                                                     | high-resolution gas chromatography coupled to a high-resolution mass spectrometer (HRGC/HRMS). | 10.1016/j.envres.2022.113032      |
| organic | eicosanoic acid (C <sub>20</sub> ) | saturated fatty acids |      | 172.8±79.8                   | ng m <sup>-3</sup>    | seven different cuisine types | quartz-fiber filters                                                                                         | solvent extraction-gas chromatography mass spectrometry (SE-GC/MS) method                      | 10.1016/j.chemosphere.2020.127758 |
| organic | ethane                             | alkanes               | VOCs | Numerical data not available | NA                    | Firepower Sweep Test (FST)    | Vacuum canister fitted with a critical orifice (CS1200ES Sampler; ENTECH Instruments, Inc.; Simi Valley, CA) | Gas chromatograph mass spectrometer (GC-17A); Shimadzu; Kyoto, Japan                           | 10.1021/acs.est.8b07019           |
| organic | ethene                             | alkenes               | VOCs | Numerical data not available | NA                    | Firepower Sweep Test (FST)    | Vacuum canister fitted with a critical orifice (CS1200ES Sampler; ENTECH Instruments, Inc.; Simi Valley, CA) | Gas chromatograph mass spectrometer (GC-17A); Shimadzu; Kyoto, Japan                           | 10.1021/acs.est.8b07019           |

|           |              |                |            |                              |          |                                                                                      |                                                                                                                               |                                                                                                                        |                              |
|-----------|--------------|----------------|------------|------------------------------|----------|--------------------------------------------------------------------------------------|-------------------------------------------------------------------------------------------------------------------------------|------------------------------------------------------------------------------------------------------------------------|------------------------------|
| organic   | ethylbenzene | aromatics      | VOCs       | Numerical data not available | NA       | Firepower Sweep Test (FST)                                                           | Vacuum canister fitted with a critical orifice (CS1200ES Sampler; ENTECH Instruments, Inc.; Simi Valley, CA)                  | Gas chromatograph mass spectrometer (GC-17A); Shimadzu; Kyoto, Japan                                                   | 10.1021/acs.est.8b07019      |
| organic   | ethyne       | alkynes        | VOCs       | Numerical data not available | NA       | Firepower Sweep Test (FST)                                                           | Vacuum canister fitted with a critical orifice (CS1200ES Sampler; ENTECH Instruments, Inc.; Simi Valley, CA)                  | Gas chromatograph mass spectrometer (GC-17A); Shimadzu; Kyoto, Japan                                                   | 10.1021/acs.est.8b07019      |
| Inorganic | Fe           | inorganic ions | metal ions | 9,82                         | ug m-3   | General cooking activities                                                           | cellulose/PTFE collection filters fitted in the cyclones of size-selective inlets of diameter 2.5 µm connected to the sampler | ICP-OES (8300 Perkin Elmer, USA)                                                                                       | 10.1007/s42452-020-03800-0   |
| Inorganic | Fe           | inorganic ions | metal ions | 1.1 ± 0.1                    | [mg g-1] | sets of duplicate cooking samples were collected, using the most used 5 types of oil | 37 mm polypropylene-fiber filter (Pall-Gelman, Ann Arbor, MI, USA)                                                            | ICP-OES, Vista-MPX, Varian Co, Palo Alta, CA, USA                                                                      | 10.1016/j.envpol.2017.04.033 |
| Inorganic | Fe           | inorganic ions | metal ions | 7.56 ± 4.16                  | [mg g-1] | General cooking activities                                                           | 150 mm pure quartz microfibres filters (Fiorini, France)                                                                      | Inductively Coupled Plasma-Atomic Emission Spectrometry (ICP-AES, iCAP 6000 series, Thermo Scientific, United Kingdom) | 10.1016/j.envres.2022.113032 |

|           |              |                |            |                              |          |                                                                                      |                                                                                                                                                               |                                                                                                                                                                                                                                                                                                                                    |                                 |
|-----------|--------------|----------------|------------|------------------------------|----------|--------------------------------------------------------------------------------------|---------------------------------------------------------------------------------------------------------------------------------------------------------------|------------------------------------------------------------------------------------------------------------------------------------------------------------------------------------------------------------------------------------------------------------------------------------------------------------------------------------|---------------------------------|
| Inorganic | Fe           | inorganic ions | metal ions | 330                          | ng m-3   | Hong Kong based restaurants and two simulated cooking experiments                    | Teflon-membrane (47 mm), Nuclepore polycarbonate membrane and quartz-fiber filter (47 mm)                                                                     | The inorganic elements and water soluble ions were analysed by the Energy Dispersive X-ray Fluorescence Analyser (ED-XRF) and ion chromatography system, respectively. The polycyclic aromatic compounds (PACs) in the filters were extracted with organic solvents and determined by gas chromatography-mass spectrometry (GC-MS) | 10.1016/j.envpol.2021.117754    |
| organic   | fluoranthene | four rings     | PAHs       | 0.005 ± 0.001                | [mg g-1] | sets of duplicate cooking samples were collected, using the most used 5 types of oil | quartz fiber filter (Pall-Gelman, Ann Arbor, MI, USA)                                                                                                         | gas chromatography coupled with mass spectrometry method (GC/MS, trace 2000 GC-MS, Thermo Finnigan, USA)                                                                                                                                                                                                                           | 10.1016/j.envpol.2017.04.033    |
| organic   | fluoranthene | four rings     | PAHs       | Numerical data not available | NA       | Firepower Sweep Test (FST)                                                           | Particle phase: Tissuquartz #2500QAT-UP; Pall Corporation; Port Washington, NY; Gas phase: PUF Replacement P226-92; SKC-West, Inc; Fullerton, CA (two inline) | Agilent 6890/5973 Inert, Agilent Technologies, Santa Clara, CA                                                                                                                                                                                                                                                                     | 10.1021/acs.est.8b07019         |
| organic   | Fluoranthene | four rings     | PAHs       | 53,2                         | ug g-1   | poultry cooking and grilling                                                         | 47 mm diameter quartz fibre filters                                                                                                                           | chromatography-mass spectrometry (GC-MS)                                                                                                                                                                                                                                                                                           | 10.1016/j.scitotenv.2021.146090 |

|         |              |             |      |                              |          |                               |                                                                                                                                                                                                                      |                                                                                                                                                                                                                                   |                                   |
|---------|--------------|-------------|------|------------------------------|----------|-------------------------------|----------------------------------------------------------------------------------------------------------------------------------------------------------------------------------------------------------------------|-----------------------------------------------------------------------------------------------------------------------------------------------------------------------------------------------------------------------------------|-----------------------------------|
| organic | Fluoranthene | four rings  | PAH  | Numerical data not available | NA       | ND                            | PAHs bounded to PM2.5 were collected on unloaded quartz fiber filters (QFFs, Tissuquartz 2500QAT-UP, PALL Corporation, USA) using a cascade impactor (PEM, SKC, PA, USA) connected to an active pump (SKC, PA, USA). | deuterated standards prior to detection. PAHs was analyzed using a gas chromatograph coupled with a mass spectrometer (GC-MS, Agilent GC 6890, MS 5973, USA) with a HP-5MS capillary column in the electron ionization (EI) mode. | 10.1016/j.envpol.2020.115592      |
| organic | Fluoranthene | four rings  | PAHs | 0,183                        | ng m-3   | General cooking activities    | 62 mm diameter quartz filters                                                                                                                                                                                        | GC-MS from Agilent (Santa Clara, CA, USA) with single quadrupole                                                                                                                                                                  | 10.3390/ijerph17145271            |
| organic | Fluoranthene | four rings  | PAHs | 0.02 ± 0.01                  | [mg g-1] | General cooking activities    | 150 mm pure quartz microfibres filters (Fiorini, France)                                                                                                                                                             | high-resolution gas chromatography coupled to a high-resolution mass spectrometer (HRGC/HRMS).                                                                                                                                    | 10.1016/j.envres.2022.113032      |
| organic | fluoranthene | three rings | PAHs | 18.5±10.7                    | ng m-3   | seven different cuisine types | quartz-fiber filters                                                                                                                                                                                                 | solvent extraction-gas chromatography mass spectrometry (SE-GC/MS) method                                                                                                                                                         | 10.1016/j.chemosphere.2020.127758 |

|         |              |             |      |                              |          |                                                                                      |                                                                                                                                                               |                                                                                                                                                                                                                                                                                                                                    |                                 |
|---------|--------------|-------------|------|------------------------------|----------|--------------------------------------------------------------------------------------|---------------------------------------------------------------------------------------------------------------------------------------------------------------|------------------------------------------------------------------------------------------------------------------------------------------------------------------------------------------------------------------------------------------------------------------------------------------------------------------------------------|---------------------------------|
| organic | Fluoranthene | four rings  | PAHs | 888.7                        | pg m-3   | Hong Kong based restaurants and two simulated cooking experiments                    | Teflon-membrane (47 mm), Nuclepore polycarbonate membrane and quartz-fiber filter (47 mm)                                                                     | The inorganic elements and water soluble ions were analysed by the Energy Dispersive X-ray Fluorescence Analyser (ED-XRF) and ion chromatography system, respectively. The polycyclic aromatic compounds (PACs) in the filters were extracted with organic solvents and determined by gas chromatography-mass spectrometry (GC-MS) | 10.1016/j.envpol.2021.117754    |
| organic | fluorene     | three rings | PAHs | 0.002 ± 0.000                | [mg g-1] | sets of duplicate cooking samples were collected, using the most used 5 types of oil | quartz fiber filter (Pall-Gelman, Ann Arbor, MI, USA)                                                                                                         | gas chromatography coupled with mass spectrometry method (GC/MS, trace 2000 GC-MS, Thermo Finnigan, USA)                                                                                                                                                                                                                           | 10.1016/j.envpol.2017.04.033    |
| organic | fluorene     | three rings | PAHs | Numerical data not available | NA       | Firepower Sweep Test (FST)                                                           | Particle phase: Tissuquartz #2500QAT-UP; Pall Corporation; Port Washington, NY; Gas phase: PUF Replacement P226-92; SKC-West, Inc; Fullerton, CA (two inline) | Agilent 6890/5973 Inert, Agilent Technologies, Santa Clara, CA                                                                                                                                                                                                                                                                     | 10.1021/acs.est.8b07019         |
| organic | Fluorene     | three rings | PAHs | 7,52                         | ug g-1   | poultry cooking and grilling                                                         | 47 mm diameter quartz fibre filters                                                                                                                           | chromatography-mass spectrometry (GC-MS)                                                                                                                                                                                                                                                                                           | 10.1016/j.scitotenv.2021.146090 |

|         |          |             |      |                              |        |                                                                   |                                                                                                                                                                                                                      |                                                                                                                                                                                                                                                                                                                                    |                                   |
|---------|----------|-------------|------|------------------------------|--------|-------------------------------------------------------------------|----------------------------------------------------------------------------------------------------------------------------------------------------------------------------------------------------------------------|------------------------------------------------------------------------------------------------------------------------------------------------------------------------------------------------------------------------------------------------------------------------------------------------------------------------------------|-----------------------------------|
| organic | Fluorene | three rings | PAH  | Numerical data not available | NA     | ND                                                                | PAHs bounded to PM2.5 were collected on unloaded quartz fiber filters (QFFs, Tissuquartz 2500QAT-UP, PALL Corporation, USA) using a cascade impactor (PEM, SKC, PA, USA) connected to an active pump (SKC, PA, USA). | deuterated standards prior to detection. PAHs was analyzed using a gas chromatograph coupled with a mass spectrometer (GC-MS, Agilent GC 6890, MS 5973, USA) with a HP-5MS capillary column in the electron ionization (EI) mode.                                                                                                  | 10.1016/j.envpol.2020.115592      |
| organic | Fluorene | three rings | PAHs | 0.0219                       | ng m-3 | General cooking activities                                        | 59 mm diameter quartz filters                                                                                                                                                                                        | GC-MS from Agilent (Santa Clara, CA, USA) with single quadrupole                                                                                                                                                                                                                                                                   | 10.3390/ijerph17145268            |
| organic | fluorene | three rings | PAHs | 8.2±5.4                      | ng m-3 | seven different cuisine types                                     | quartz-fiber filters                                                                                                                                                                                                 | solvent extraction-gas chromatography mass spectrometry (SE-GC/MS) method                                                                                                                                                                                                                                                          | 10.1016/j.chemosphere.2020.127758 |
| organic | Fluorene | three rings | PAHs | 734.5                        | pg m-3 | Hong Kong based restaurants and two simulated cooking experiments | Teflon-membrane (47 mm), Nuclepore polycarbonate membrane and quartz-fiber filter (47 mm)                                                                                                                            | The inorganic elements and water soluble ions were analysed by the Energy Dispersive X-ray Fluorescence Analyser (ED-XRF) and ion chromatography system, respectively. The polycyclic aromatic compounds (PACs) in the filters were extracted with organic solvents and determined by gas chromatography-mass spectrometry (GC-MS) | 10.1016/j.envpol.2021.117754      |

|         |                                 |                     |               |                              |        |                               |                                                                                                                                                                                                                 |                                                                           |                                   |
|---------|---------------------------------|---------------------|---------------|------------------------------|--------|-------------------------------|-----------------------------------------------------------------------------------------------------------------------------------------------------------------------------------------------------------------|---------------------------------------------------------------------------|-----------------------------------|
| organic | formaldehyde                    | saturated aldehydes | carbonyls     | Numerical data not available | NA     | Firepower Sweep Test (FST)    | Dinitrophenylhydrazine cartridge (Sep-Pak DNPH-Silica Cartridge; Waters Corp; Milford, MA) placed inline behind an ozone scrubber (Sep-Pak Ozone Scrubber Potassium Iodide Cartridge; Waters Corp; Milford, MA) | HPLC 1050 series; Agilent Technologies; Santa Clara, CA                   | 10.1021/acs.est.8b07019           |
| organic | fumaric acid (C <sub>4</sub> -) | Dicarboxylic acids  |               | 17.5±7.2                     | ng m-3 | seven different cuisine types | quartz-fiber filters                                                                                                                                                                                            | solvent extraction-gas chromatography mass spectrometry (SE-GC/MS) method | 10.1016/j.chemosphere.2020.127758 |
| organic | galactosan                      | carbohydrates       | carbohydrates | Numerical data not available | NA     | Firepower Sweep Test (FST)    | Tissuquartz #2500QAT-UP; Pall Corporation; Port Washington, NY                                                                                                                                                  | 1260 Infinity; Agilent Technologies; Santa Clara, CA                      | 10.1021/acs.est.8b07019           |
| organic | galactose                       | carbohydrates       | carbohydrates | Numerical data not available | NA     | Firepower Sweep Test (FST)    | Tissuquartz #2500QAT-UP; Pall Corporation; Port Washington, NY                                                                                                                                                  | 1260 Infinity; Agilent Technologies; Santa Clara, CA                      | 10.1021/acs.est.8b07019           |
| organic | glucose                         | carbohydrates       | carbohydrates | Numerical data not available | NA     | Firepower Sweep Test (FST)    | Tissuquartz #2500QAT-UP; Pall Corporation; Port Washington, NY                                                                                                                                                  | 1260 Infinity; Agilent Technologies; Santa Clara, CA                      | 10.1021/acs.est.8b07019           |
| organic | glutaric acid (C <sub>5</sub> ) | Dicarboxylic acids  |               | 114.2±70.5                   | ng m-3 | seven different cuisine types | quartz-fiber filters                                                                                                                                                                                            | solvent extraction-gas chromatography mass spectrometry (SE-GC/MS) method | 10.1016/j.chemosphere.2020.127758 |
| organic | glycerol                        | carbohydrates       | carbohydrates | Numerical data not available | NA     | Firepower Sweep Test (FST)    | Tissuquartz #2500QAT-UP; Pall Corporation; Port Washington, NY                                                                                                                                                  | 1260 Infinity; Agilent Technologies; Santa Clara, CA                      | 10.1021/acs.est.8b07019           |

|         |                                       |                       |           |             |          |                                                                   |                                                                                           |                                                                                                                                                                                                                                                                                                                                    |                                   |
|---------|---------------------------------------|-----------------------|-----------|-------------|----------|-------------------------------------------------------------------|-------------------------------------------------------------------------------------------|------------------------------------------------------------------------------------------------------------------------------------------------------------------------------------------------------------------------------------------------------------------------------------------------------------------------------------|-----------------------------------|
| organic | Glyoxal                               |                       | Carbonyls |             | pg m-3   | Hong Kong based restaurants and two simulated cooking experiments | Teflon-membrane (47 mm), Nuclepore polycarbonate membrane and quartz-fiber filter (47 mm) | The inorganic elements and water soluble ions were analysed by the Energy Dispersive X-ray Fluorescence Analyser (ED-XRF) and ion chromatography system, respectively. The polycyclic aromatic compounds (PACs) in the filters were extracted with organic solvents and determined by gas chromatography-mass spectrometry (GC-MS) | 10.1016/j.envpol.2021.117754      |
| organic | Heneicosane                           | alcanes               |           | 0.25 ± 0.17 | [mg g-1] | General cooking activities                                        | 150 mm pure quartz microfibres filters (Fiorini, France)                                  | high-resolution gas chromatography coupled to a high-resolution mass spectrometer (HRGC/HRMS).                                                                                                                                                                                                                                     | 10.1016/j.envres.2022.113032      |
| organic | heneicosane (n-C <sub>21</sub> )      | alcanes               |           | 14.8±9.0    | ng m-3   | seven different cuisine types                                     | quartz-fiber filters                                                                      | solvent extraction-gas chromatography mass spectrometry (SE-GC/MS) method                                                                                                                                                                                                                                                          | 10.1016/j.chemosphere.2020.127758 |
| organic | heneicosanoic acid (C <sub>21</sub> ) | saturated fatty acids |           | 11.2±8.1    | ng m-3   | seven different cuisine types                                     | quartz-fiber filters                                                                      | solvent extraction-gas chromatography mass spectrometry (SE-GC/MS) method                                                                                                                                                                                                                                                          | 10.1016/j.chemosphere.2020.127758 |
| organic | hentriacotane (n-C <sub>31</sub> )    | alcanes               |           | 0.60 ± 0.27 | [mg g-1] | General cooking activities                                        | 150 mm pure quartz microfibres filters (Fiorini, France)                                  | high-resolution gas chromatography coupled to a high-resolution mass spectrometer (HRGC/HRMS).                                                                                                                                                                                                                                     | 10.1016/j.envres.2022.113032      |

|         |                                       |                                                     |  |             |          |                               |                                                          |                                                                                                |                                   |
|---------|---------------------------------------|-----------------------------------------------------|--|-------------|----------|-------------------------------|----------------------------------------------------------|------------------------------------------------------------------------------------------------|-----------------------------------|
| organic | hentriacotane (n-C <sub>31</sub> )    | alcanes                                             |  | 51.0±41.2   | ng m-3   | seven different cuisine types | quartz-fiber filters                                     | solvent extraction-gas chromatography mass spectrometry (SE-GC/MS) method                      | 10.1016/j.chemosphere.2020.127758 |
| organic | Heptacosane                           | alcanes                                             |  | 0.48 ± 0.20 | [mg g-1] | General cooking activities    | 150 mm pure quartz microfibres filters (Fiorini, France) | high-resolution gas chromatography coupled to a high-resolution mass spectrometer (HRGC/HRMS). | 10.1016/j.envres.2022.113032      |
| organic | heptacosane (n-C <sub>27</sub> )      | alcanes                                             |  | 31.5±22.7   | ng m-3   | seven different cuisine types | quartz-fiber filters                                     | solvent extraction-gas chromatography mass spectrometry (SE-GC/MS) method                      | 10.1016/j.chemosphere.2020.127758 |
| organic | Heptacosanol                          | Alcohols, sterols and other compounds with OH group |  | 0,008       | ug g-1   | poultry cooking and grilling  | 47 mm diameter quartz fibre filters                      | chromatography-mass spectrometry (GC-MS)                                                       | 10.1016/j.scitotenv.2021.146090   |
| organic | Heptadecane                           | alcanes                                             |  | 0.06 ± 0.06 | [mg g-1] | General cooking activities    | 150 mm pure quartz microfibres filters (Fiorini, France) | high-resolution gas chromatography coupled to a high-resolution mass spectrometer (HRGC/HRMS). | 10.1016/j.envres.2022.113032      |
| organic | heptadecane (n-C <sub>17</sub> )      | alcanes                                             |  | 10.8±6.5    | ng m-3   | seven different cuisine types | quartz-fiber filters                                     | solvent extraction-gas chromatography mass spectrometry (SE-GC/MS) method                      | 10.1016/j.chemosphere.2020.127758 |
| organic | heptadecanoic acid (C <sub>17</sub> ) | saturated fatty acids                               |  | 103.7±71.4  | ng m-3   | seven different cuisine types | quartz-fiber filters                                     | solvent extraction-gas chromatography mass spectrometry (SE-GC/MS) method                      | 10.1016/j.chemosphere.2020.127758 |

|         |                                  |                       |           |             |                       |                                                                   |                                                                                           |                                                                                                                                                                                                                                                                                                                                    |                                   |
|---------|----------------------------------|-----------------------|-----------|-------------|-----------------------|-------------------------------------------------------------------|-------------------------------------------------------------------------------------------|------------------------------------------------------------------------------------------------------------------------------------------------------------------------------------------------------------------------------------------------------------------------------------------------------------------------------------|-----------------------------------|
| organic | Heptaldehyde (C <sub>7</sub> )   |                       | Carbonyls |             | pg m-3                | Hong Kong based restaurants and two simulated cooking experiments | Teflon-membrane (47 mm), Nuclepore polycarbonate membrane and quartz-fiber filter (47 mm) | The inorganic elements and water soluble ions were analysed by the Energy Dispersive X-ray Fluorescence Analyser (ED-XRF) and ion chromatography system, respectively. The polycyclic aromatic compounds (PACs) in the filters were extracted with organic solvents and determined by gas chromatography-mass spectrometry (GC-MS) | 10.1016/j.envpol.2021.117754      |
| organic | heptanoic acid (C <sub>7</sub> ) | saturated fatty acids |           | 43.2±61.8   | ng m-3                | seven different cuisine types                                     | quartz-fiber filters                                                                      | solvent extraction-gas chromatography mass spectrometry (SE-GC/MS) method                                                                                                                                                                                                                                                          | 10.1016/j.chemosphere.2020.127758 |
| organic | hexacosane (n-C <sub>26</sub> )  | alkanes               |           | 0.39 ± 0.10 | [mg g <sup>-1</sup> ] | General cooking activities                                        | 150 mm pure quartz microfibres filters (Fiorini, France)                                  | high-resolution gas chromatography coupled to a high-resolution mass spectrometer (HRGC/HRMS).                                                                                                                                                                                                                                     | 10.1016/j.envres.2022.113032      |
| organic | hexacosane (n-C <sub>26</sub> )  | alkanes               |           | 15.8±22.6   | ng m-3                | seven different cuisine types                                     | quartz-fiber filters                                                                      | solvent extraction-gas chromatography mass spectrometry (SE-GC/MS) method                                                                                                                                                                                                                                                          | 10.1016/j.chemosphere.2020.127758 |
| organic | Hexadecane                       | alkanes               |           | 0.07 ± 0.05 | [mg g <sup>-1</sup> ] | General cooking activities                                        | 150 mm pure quartz microfibres filters (Fiorini, France)                                  | high-resolution gas chromatography coupled to a high-resolution mass spectrometer (HRGC/HRMS).                                                                                                                                                                                                                                     | 10.1016/j.envres.2022.113032      |

|         |                                      |                       |           |               |          |                                                                   |                                                                                           |                                                                                                                                                                                                                                                                                                                                    |                                   |
|---------|--------------------------------------|-----------------------|-----------|---------------|----------|-------------------------------------------------------------------|-------------------------------------------------------------------------------------------|------------------------------------------------------------------------------------------------------------------------------------------------------------------------------------------------------------------------------------------------------------------------------------------------------------------------------------|-----------------------------------|
| organic | hexadecane (n-C <sub>16</sub> )      | alkanes               |           | 2.5±3.8       | ng m-3   | seven different cuisine types                                     | quartz-fiber filters                                                                      | solvent extraction-gas chromatography mass spectrometry (SE-GC/MS) method                                                                                                                                                                                                                                                          | 10.1016/j.chemosphere.2020.127758 |
| organic | Hexadecanoic acid                    | carboxylic acids      |           | 33,6          | ug g-1   | poultry cooking and grilling                                      | 47 mm diameter quartz fibre filters                                                       | chromatography-mass spectrometry (GC-MS)                                                                                                                                                                                                                                                                                           | 10.1016/j.scitotenv.2021.146090   |
| organic | Hexadecanoic acid                    | carboxylic acids      |           | 98 ± 31       | [mg g-1] | General cooking activities                                        | 150 mm pure quartz microfibres filters (Fiorini, France)                                  | high-resolution gas chromatography coupled to a high-resolution mass spectrometer (HRGC/HRMS).                                                                                                                                                                                                                                     | 10.1016/j.envres.2022.113032      |
| organic | hexadecanoic acid (C <sub>16</sub> ) | saturated fatty acids |           | 6731.3±3279.7 | ng m-3   | seven different cuisine types                                     | quartz-fiber filters                                                                      | solvent extraction-gas chromatography mass spectrometry (SE-GC/MS) method                                                                                                                                                                                                                                                          | 10.1016/j.chemosphere.2020.127758 |
| organic | Hexaldehyde (C <sub>6</sub> )        |                       | Carbonyls |               | pg m-3   | Hong Kong based restaurants and two simulated cooking experiments | Teflon-membrane (47 mm), Nuclepore polycarbonate membrane and quartz-fiber filter (47 mm) | The inorganic elements and water soluble ions were analysed by the Energy Dispersive X-ray Fluorescence Analyser (ED-XRF) and ion chromatography system, respectively. The polycyclic aromatic compounds (PACs) in the filters were extracted with organic solvents and determined by gas chromatography-mass spectrometry (GC-MS) | 10.1016/j.envpol.2021.117754      |
| organic | hexanoic acid (C <sub>6</sub> )      | saturated fatty acids |           | 84.7±45.3     | ng m-3   | seven different cuisine types                                     | quartz-fiber filters                                                                      | solvent extraction-gas chromatography mass spectrometry (SE-GC/MS) method                                                                                                                                                                                                                                                          | 10.1016/j.chemosphere.2020.127758 |

|         |                                      |                       |      |                              |        |                               |                                                                                                              |                                                                           |                                   |
|---------|--------------------------------------|-----------------------|------|------------------------------|--------|-------------------------------|--------------------------------------------------------------------------------------------------------------|---------------------------------------------------------------------------|-----------------------------------|
| organic | hexacosanoic acid (C <sub>26</sub> ) | saturated fatty acids |      | 8.9±3.9                      | ng m-3 | seven different cuisine types | quartz-fiber filters                                                                                         | solvent extraction-gas chromatography mass spectrometry (SE-GC/MS) method | 10.1016/j.chemosphere.2020.127758 |
| organic | i-butane                             | alkanes               | VOCs | Numerical data not available | NA     | Firepower Sweep Test (FST)    | Vacuum canister fitted with a critical orifice (CS1200ES Sampler; ENTECH Instruments, Inc.; Simi Valley, CA) | Gas chromatograph mass spectrometer (GC-17A); Shimadzu; Kyoto, Japan      | 10.1021/acs.est.8b07019           |
| organic | i-butene                             | alkenes               | VOCs | Numerical data not available | NA     | Firepower Sweep Test (FST)    | Vacuum canister fitted with a critical orifice (CS1200ES Sampler; ENTECH Instruments, Inc.; Simi Valley, CA) | Gas chromatograph mass spectrometer (GC-17A); Shimadzu; Kyoto, Japan      | 10.1021/acs.est.8b07019           |
| organic | i-pentane                            | alkanes               | VOCs | Numerical data not available | NA     | Firepower Sweep Test (FST)    | Vacuum canister fitted with a critical orifice (CS1200ES Sampler; ENTECH Instruments, Inc.; Simi Valley, CA) | Gas chromatograph mass spectrometer (GC-17A); Shimadzu; Kyoto, Japan      | 10.1021/acs.est.8b07019           |
| organic | i-propylbenzene                      | aromatics             | VOCs | Numerical data not available | NA     | Firepower Sweep Test (FST)    | Vacuum canister fitted with a critical orifice (CS1200ES Sampler; ENTECH Instruments, Inc.; Simi Valley, CA) | Gas chromatograph mass spectrometer (GC-17A); Shimadzu; Kyoto, Japan      | 10.1021/acs.est.8b07019           |
| organic | icosane (n-C <sub>20</sub> )         | alkanes               |      | 8.7±9.3                      | ng m-3 | seven different cuisine types | quartz-fiber filters                                                                                         | solvent extraction-gas chromatography mass spectrometry (SE-GC/MS) method | 10.1016/j.chemosphere.2020.127758 |

|         |                         |           |      |                              |                       |                                                                                      |                                                                                                                                                                                                                      |                                                                                                                                                                                                                                   |                                   |
|---------|-------------------------|-----------|------|------------------------------|-----------------------|--------------------------------------------------------------------------------------|----------------------------------------------------------------------------------------------------------------------------------------------------------------------------------------------------------------------|-----------------------------------------------------------------------------------------------------------------------------------------------------------------------------------------------------------------------------------|-----------------------------------|
| organic | Indeno (1,2,3-cd)pyrene | aromatics | PAH  | Numerical data not available | NA                    | ND                                                                                   | PAHs bounded to PM2.5 were collected on unloaded quartz fiber filters (QFFs, Tissuquartz 2500QAT-UP, PALL Corporation, USA) using a cascade impactor (PEM, SKC, PA, USA) connected to an active pump (SKC, PA, USA). | deuterated standards prior to detection. PAHs was analyzed using a gas chromatograph coupled with a mass spectrometer (GC-MS, Agilent GC 6890, MS 5973, USA) with a HP-5MS capillary column in the electron ionization (EI) mode. | 10.1016/j.envpol.2020.115592      |
| organic | indeno(1,2,3) cd pyrene | aromatics | VOCs | Numerical data not available | NA                    | Firepower Sweep Test (FST)                                                           | Vacuum canister fitted with a critical orifice (CS1200ES Sampler; ENTECH Instruments, Inc.; Simi Valley, CA)                                                                                                         | Gas chromatograph mass spectrometer (GC-17A); Shimadzu; Kyoto, Japan                                                                                                                                                              | 10.1021/acs.est.8b07019           |
| organic | indeno[1,2,3-c,d]pyrene | six rings | PAHs | 0.001 ± 0.001                | [mg g <sup>-1</sup> ] | sets of duplicate cooking samples were collected, using the most used 5 types of oil | quartz fiber filter (Pall-Gelman, Ann Arbor, MI, USA)                                                                                                                                                                | gas chromatography coupled with mass spectrometry method (GC/MS, trace 2000 GC-MS, Thermo Finnigan, USA)                                                                                                                          | 10.1016/j.envpol.2017.04.033      |
| organic | Indeno[1,2,3-cd]pyrene  | six rings | PAHs | 6,45                         | ug g <sup>-1</sup>    | poultry cooking and grilling                                                         | 47 mm diameter quartz fibre filters                                                                                                                                                                                  | chromatography-mass spectrometry (GC-MS)                                                                                                                                                                                          | 10.1016/j.scitotenv.2021.146090   |
| organic | Indeno[1,2,3-cd]pyrene  | six rings | PAHs | 1,05                         | ng m <sup>-3</sup>    | General cooking activities                                                           | 74 mm diameter quartz filters                                                                                                                                                                                        | GC-MS from Agilent (Santa Clara, CA, USA) with single quadrupole                                                                                                                                                                  | 10.3390/ijerph17145283            |
| organic | indeno[1,2,3-cd]pyrene  | six rings | PAHs | 25.3±25.6                    | ng m <sup>-3</sup>    | seven different cuisine types                                                        | quartz-fiber filters                                                                                                                                                                                                 | solvent extraction-gas chromatography mass spectrometry (SE-GC/MS) method                                                                                                                                                         | 10.1016/j.chemosphere.2020.127758 |

|         |                        |                    |      |           |        |                                                                   |                                                                                           |                                                                                                                                                                                                                                                                                                                                    |                                   |
|---------|------------------------|--------------------|------|-----------|--------|-------------------------------------------------------------------|-------------------------------------------------------------------------------------------|------------------------------------------------------------------------------------------------------------------------------------------------------------------------------------------------------------------------------------------------------------------------------------------------------------------------------------|-----------------------------------|
| organic | Indeno[1,2,3-cd]pyrene | six rings          | PAHs | 972.4     | pg m-3 | Hong Kong based restaurants and two simulated cooking experiments | Teflon-membrane (47 mm), Nuclepore polycarbonate membrane and quartz-fiber filter (47 mm) | The inorganic elements and water soluble ions were analysed by the Energy Dispersive X-ray Fluorescence Analyser (ED-XRF) and ion chromatography system, respectively. The polycyclic aromatic compounds (PACs) in the filters were extracted with organic solvents and determined by gas chromatography-mass spectrometry (GC-MS) | 10.1016/j.envpol.2021.117754      |
| organic | iso-C <sub>29</sub>    | alkanes            |      | 1.7±1.7   | ng m-3 | seven different cuisine types                                     | quartz-fiber filters                                                                      | solvent extraction-gas chromatography mass spectrometry (SE-GC/MS) method                                                                                                                                                                                                                                                          | 10.1016/j.chemosphere.2020.127758 |
| organic | iso-C <sub>30</sub>    | alkanes            |      | 3.6±3.2   | ng m-3 | seven different cuisine types                                     | quartz-fiber filters                                                                      | solvent extraction-gas chromatography mass spectrometry (SE-GC/MS) method                                                                                                                                                                                                                                                          | 10.1016/j.chemosphere.2020.127758 |
| organic | iso-C <sub>31</sub>    | alkanes            |      | 13.7±10.5 | ng m-3 | seven different cuisine types                                     | quartz-fiber filters                                                                      | solvent extraction-gas chromatography mass spectrometry (SE-GC/MS) method                                                                                                                                                                                                                                                          | 10.1016/j.chemosphere.2020.127758 |
| organic | isophthalic acid (1,3) | Dicarboxylic acids |      | 32.1±10.6 | ng m-3 | seven different cuisine types                                     | quartz-fiber filters                                                                      | solvent extraction-gas chromatography mass spectrometry (SE-GC/MS) method                                                                                                                                                                                                                                                          | 10.1016/j.chemosphere.2020.127758 |

|           |                  |                |           |                              |                       |                                                                                      |                                                                                                                                                                                                                 |                                                                                                                        |                              |
|-----------|------------------|----------------|-----------|------------------------------|-----------------------|--------------------------------------------------------------------------------------|-----------------------------------------------------------------------------------------------------------------------------------------------------------------------------------------------------------------|------------------------------------------------------------------------------------------------------------------------|------------------------------|
| organic   | isovaleraldehyde | ketones        | carbonyls | Numerical data not available | NA                    | Firepower Sweep Test (FST)                                                           | Dinitrophenylhydrazine cartridge (Sep-Pak DNPH-Silica Cartridge; Waters Corp; Milford, MA) placed inline behind an ozone scrubber (Sep-Pak Ozone Scrubber Potassium Iodide Cartridge; Waters Corp; Milford, MA) | HPLC 1050 series; Agilent Technologies; Santa Clara, CA                                                                | 10.1021/acs.est.8b07019      |
| Inorganic | K                | inorganic ions |           | Numerical data not available | NA                    | Firepower Sweep Test (FST)                                                           |                                                                                                                                                                                                                 | CS-3000 Ion Chromatography System; Dionex; Waltham, MA                                                                 | 10.1021/acs.est.8b07019      |
| Inorganic | K                | inorganic ions |           | 1.1 ± 0.0                    | [mg g <sup>-1</sup> ] | sets of duplicate cooking samples were collected, using the most used 5 types of oil |                                                                                                                                                                                                                 | ICP-OES, Vista-MPX, Varian Co, Palo Alto, CA, USA                                                                      | 10.1016/j.envpol.2017.04.033 |
| Inorganic | K                | inorganic ions |           | 17                           | [mg g <sup>-1</sup> ] | General cooking activities                                                           | 150 mm pure quartz microfibre filters (Fiorini, France)                                                                                                                                                         | Inductively Coupled Plasma-Atomic Emission Spectrometry (ICP-AES, iCAP 6000 series, Thermo Scientific, United Kingdom) | 10.1016/j.envres.2022.113032 |

|           |                |                |               |                              |          |                                                                   |                                                                                           |                                                                                                                                                                                                                                                                                                                                    |                                   |
|-----------|----------------|----------------|---------------|------------------------------|----------|-------------------------------------------------------------------|-------------------------------------------------------------------------------------------|------------------------------------------------------------------------------------------------------------------------------------------------------------------------------------------------------------------------------------------------------------------------------------------------------------------------------------|-----------------------------------|
| Inorganic | K              | inorganic ions |               | 467.1                        | ng m-3   | Hong Kong based restaurants and two simulated cooking experiments | Teflon-membrane (47 mm), Nuclepore polycarbonate membrane and quartz-fiber filter (47 mm) | The inorganic elements and water soluble ions were analysed by the Energy Dispersive X-ray Fluorescence Analyser (ED-XRF) and ion chromatography system, respectively. The polycyclic aromatic compounds (PACs) in the filters were extracted with organic solvents and determined by gas chromatography-mass spectrometry (GC-MS) | 10.1016/j.envpol.2021.117754      |
| Inorganic | K <sup>+</sup> | inorganic ions |               | 3.1 ± 0.8                    | [mg g-1] | General cooking activities                                        | 150 mm pure quartz microfibre filters (Fiorini, France)                                   | liquid ion chromatography (Dionex™ ICS-900, Thermo Scientific, United Kingdom)                                                                                                                                                                                                                                                     | 10.1016/j.envres.2022.113032      |
| Inorganic | La             | inorganic ions | metal ions    | 0.016 ± 0.008                | [mg g-1] | General cooking activities                                        | 150 mm pure quartz microfibre filters (Fiorini, France)                                   | ICP-Mass Spectrometry (ICP-MS, Agilent 7900, United States of America)                                                                                                                                                                                                                                                             | 10.1016/j.envres.2022.113032      |
| organic   | levoglucosan   | carbohydrates  | carbohydrates | Numerical data not available | NA       | Firepower Sweep Test (FST)                                        | Tissuquartz #2500QAT-UP; Pall Corporation; Port Washington, NY                            | 1260 Infinity; Agilent Technologies; Santa Clara, CA                                                                                                                                                                                                                                                                               | 10.1021/acs.est.8b07019           |
| organic   | Levoglucosan   |                | carbohydrates | 14.2 ± 20.2                  | [mg g-1] | General cooking activities                                        | 150 mm pure quartz microfibre filters (Fiorini, France)                                   | high-resolution gas chromatography coupled to a high-resolution mass spectrometer (HRGC/HRMS).                                                                                                                                                                                                                                     | 10.1016/j.envres.2022.113032      |
| organic   | levoglucosan   |                | carbohydrates | 225.9±115.8                  | ng m-3   | seven different cuisine types                                     | quartz-fiber filters                                                                      | solvent extraction-gas chromatography mass spectrometry (SE-GC/MS) method                                                                                                                                                                                                                                                          | 10.1016/j.chemosphere.2020.127758 |

|         |                                    |                         |               |                              |        |                               |                                                                                                              |                                                                           |                                   |
|---------|------------------------------------|-------------------------|---------------|------------------------------|--------|-------------------------------|--------------------------------------------------------------------------------------------------------------|---------------------------------------------------------------------------|-----------------------------------|
| organic | linoleic acid (C <sub>18:2</sub> ) | Unsaturated fatty acids |               | 6567.0±5331.2                | ng m-3 | seven different cuisine types | quartz-fiber filters                                                                                         | solvent extraction-gas chromatography mass spectrometry (SE-GC/MS) method | 10.1016/j.chemosphere.2020.127758 |
| organic | linoleic acid (C <sub>18:2</sub> ) | Unsaturated fatty acids |               | 37.1±17.2                    | ng m-3 | seven different cuisine types | quartz-fiber filters                                                                                         | solvent extraction-gas chromatography mass spectrometry (SE-GC/MS) method | 10.1016/j.chemosphere.2020.127758 |
| organic | m,p-xylene                         | aromatics               | VOCs          | Numerical data not available | NA     | Firepower Sweep Test (FST)    | Vacuum canister fitted with a critical orifice (CS1200ES Sampler; ENTECH Instruments, Inc.; Simi Valley, CA) | Gas chromatograph mass spectrometer (GC-17A); Shimadzu; Kyoto, Japan      | 10.1021/acs.est.8b07019           |
| organic | maleic acid (C <sub>4=</sub> )     | Dicarboxylic acids      |               | 11.9±9.6                     | ng m-3 | seven different cuisine types | quartz-fiber filters                                                                                         | solvent extraction-gas chromatography mass spectrometry (SE-GC/MS) method | 10.1016/j.chemosphere.2020.127758 |
| organic | mannitol                           | carbohydrates           | carbohydrates | Numerical data not available | NA     | Firepower Sweep Test (FST)    | Tissuquartz #2500QAT-UP; Pall Corporation; Port Washington, NY                                               | 1260 Infinity; Agilent Technologies; Santa Clara, CA                      | 10.1021/acs.est.8b07019           |
| organic | mannosan                           | carbohydrates           | carbohydrates | Numerical data not available | NA     | Firepower Sweep Test (FST)    | Tissuquartz #2500QAT-UP; Pall Corporation; Port Washington, NY                                               | 1260 Infinity; Agilent Technologies; Santa Clara, CA                      | 10.1021/acs.est.8b07019           |
| organic | mannose                            | carbohydrates           | carbohydrates | Numerical data not available | NA     | Firepower Sweep Test (FST)    | Tissuquartz #2500QAT-UP; Pall Corporation; Port Washington, NY                                               | 1260 Infinity; Agilent Technologies; Santa Clara, CA                      | 10.1021/acs.est.8b07019           |
| organic | methylcyclohexane                  | aromatics               | VOCs          | Numerical data not available | NA     | Firepower Sweep Test (FST)    | Vacuum canister fitted with a critical orifice (CS1200ES Sampler; ENTECH Instruments, Inc.; Simi Valley, CA) | Gas chromatograph mass spectrometer (GC-17A); Shimadzu; Kyoto, Japan      | 10.1021/acs.est.8b07019           |

|           |               |                |           |                 |          |                                                                                      |                                                                                           |                                                                                                                                                                                                                                                                                                                                    |                              |
|-----------|---------------|----------------|-----------|-----------------|----------|--------------------------------------------------------------------------------------|-------------------------------------------------------------------------------------------|------------------------------------------------------------------------------------------------------------------------------------------------------------------------------------------------------------------------------------------------------------------------------------------------------------------------------------|------------------------------|
| organic   | Methylglyoxal |                | Carbonyls |                 | pg m-3   | Hong Kong based restaurants and two simulated cooking experiments                    | Teflon-membrane (47 mm), Nuclepore polycarbonate membrane and quartz-fiber filter (47 mm) | The inorganic elements and water soluble ions were analysed by the Energy Dispersive X-ray Fluorescence Analyser (ED-XRF) and ion chromatography system, respectively. The polycyclic aromatic compounds (PACs) in the filters were extracted with organic solvents and determined by gas chromatography-mass spectrometry (GC-MS) | 10.1016/j.envpol.2021.117754 |
| Inorganic | Mg            | inorganic ions |           | $0.76 \pm 0.30$ | [mg g-1] | sets of duplicate cooking samples were collected, using the most used 5 types of oil |                                                                                           | ICP-OES, Vista-MPX, Varian Co, Palo Alto, CA, USA                                                                                                                                                                                                                                                                                  | 10.1016/j.envpol.2017.04.033 |
| Inorganic | Mg            | inorganic ions |           | $3.71 \pm 1.20$ | [mg g-1] | General cooking activities                                                           | 150 mm pure quartz microfibre filters (Fiorini, France)                                   | Inductively Coupled Plasma-Atomic Emission Spectrometry (ICP-AES, iCAP 6000 series, Thermo Scientific, United Kingdom)                                                                                                                                                                                                             | 10.1016/j.envres.2022.113032 |

|           |                  |                |            |               |          |                                                                                      |                                                                                           |                                                                                                                                                                                                                                                                                                                                    |                              |
|-----------|------------------|----------------|------------|---------------|----------|--------------------------------------------------------------------------------------|-------------------------------------------------------------------------------------------|------------------------------------------------------------------------------------------------------------------------------------------------------------------------------------------------------------------------------------------------------------------------------------------------------------------------------------|------------------------------|
| Inorganic | Mg               | inorganic ions |            | 156.8         | ng m-3   | Hong Kong based restaurants and two simulated cooking experiments                    | Teflon-membrane (47 mm), Nuclepore polycarbonate membrane and quartz-fiber filter (47 mm) | The inorganic elements and water soluble ions were analysed by the Energy Dispersive X-ray Fluorescence Analyser (ED-XRF) and ion chromatography system, respectively. The polycyclic aromatic compounds (PACs) in the filters were extracted with organic solvents and determined by gas chromatography-mass spectrometry (GC-MS) | 10.1016/j.envpol.2021.117754 |
| Inorganic | Mg <sup>2+</sup> | inorganic ions |            | 0.9 ± 0.2     | [mg g-1] | General cooking activities                                                           | 150 mm pure quartz microfibre filters (Fiorini, France)                                   | liquid ion chromatography (Dionex™ ICS-900, Thermo Scientific, United Kingdom)                                                                                                                                                                                                                                                     | 10.1016/j.envres.2022.113032 |
| Inorganic | Mn               | inorganic ions | metal ions | 0.013 ± 0.005 | [mg g-1] | sets of duplicate cooking samples were collected, using the most used 5 types of oil | 37 mm polypropylene-fiber filter (Pall-Gelman, Ann Arbor, MI, USA)                        | ICP-MS, Agilent 7500a, Agilent Co, Santa Clara, USA                                                                                                                                                                                                                                                                                | 10.1016/j.envpol.2017.04.033 |
| Inorganic | Mn               | inorganic ions | metal ions | 0.13 ± 0.06   | [mg g-1] | General cooking activities                                                           | 150 mm pure quartz microfibre filters (Fiorini, France)                                   | Inductively Coupled Plasma-Atomic Emission Spectrometry (ICP-AES, iCAP 6000 series, Thermo Scientific, United Kingdom)                                                                                                                                                                                                             | 10.1016/j.envres.2022.113032 |

|           |                     |                |            |                              |        |                                                                   |                                                                                                              |                                                                                                                                                                                                                                                                                                                                    |                                   |
|-----------|---------------------|----------------|------------|------------------------------|--------|-------------------------------------------------------------------|--------------------------------------------------------------------------------------------------------------|------------------------------------------------------------------------------------------------------------------------------------------------------------------------------------------------------------------------------------------------------------------------------------------------------------------------------------|-----------------------------------|
| Inorganic | Mn                  | inorganic ions | metal ions | 21.1                         | ng m-3 | Hong Kong based restaurants and two simulated cooking experiments | Teflon-membrane (47 mm), Nuclepore polycarbonate membrane and quartz-fiber filter (47 mm)                    | The inorganic elements and water soluble ions were analysed by the Energy Dispersive X-ray Fluorescence Analyser (ED-XRF) and ion chromatography system, respectively. The polycyclic aromatic compounds (PACs) in the filters were extracted with organic solvents and determined by gas chromatography-mass spectrometry (GC-MS) | 10.1016/j.envpol.2021.117754      |
| organic   | monoolein (18:1)    | ester          |            | 659.7±303.3                  | ng m-3 | seven different cuisine types                                     | quartz-fiber filters                                                                                         | solvent extraction-gas chromatography mass spectrometry (SE-GC/MS) method                                                                                                                                                                                                                                                          | 10.1016/j.chemosphere.2020.127758 |
| organic   | monopalmitin (16:0) | ester          |            | 595.0±318.1                  | ng m-3 | seven different cuisine types                                     | quartz-fiber filters                                                                                         | solvent extraction-gas chromatography mass spectrometry (SE-GC/MS) method                                                                                                                                                                                                                                                          | 10.1016/j.chemosphere.2020.127758 |
| organic   | monostearin (18:0)  | ester          |            | 298.3±436.6                  | ng m-3 | seven different cuisine types                                     | quartz-fiber filters                                                                                         | solvent extraction-gas chromatography mass spectrometry (SE-GC/MS) method                                                                                                                                                                                                                                                          | 10.1016/j.chemosphere.2020.127758 |
| organic   | n-butane            | alkanes        | VOCs       | Numerical data not available | NA     | Firepower Sweep Test (FST)                                        | Vacuum canister fitted with a critical orifice (CS1200ES Sampler; ENTECH Instruments, Inc.; Simi Valley, CA) | Gas chromatograph mass spectrometer (GC-17A); Shimadzu; Kyoto, Japan                                                                                                                                                                                                                                                               | 10.1021/acs.est.8b07019           |

|           |                 |                |      |                              |                       |                                                                                      |                                                                                                              |                                                                                                                        |                              |
|-----------|-----------------|----------------|------|------------------------------|-----------------------|--------------------------------------------------------------------------------------|--------------------------------------------------------------------------------------------------------------|------------------------------------------------------------------------------------------------------------------------|------------------------------|
| organic   | n-decane        | alkanes        | VOCs | Numerical data not available | NA                    | Firepower Sweep Test (FST)                                                           | Vacuum canister fitted with a critical orifice (CS1200ES Sampler; ENTECH Instruments, Inc.; Simi Valley, CA) | Gas chromatograph mass spectrometer (GC-17A); Shimadzu; Kyoto, Japan                                                   | 10.1021/acs.est.8b07019      |
| organic   | n-heptane       | alkanes        | VOCs | Numerical data not available | NA                    | Firepower Sweep Test (FST)                                                           | Vacuum canister fitted with a critical orifice (CS1200ES Sampler; ENTECH Instruments, Inc.; Simi Valley, CA) | Gas chromatograph mass spectrometer (GC-17A); Shimadzu; Kyoto, Japan                                                   | 10.1021/acs.est.8b07019      |
| organic   | n-hexane        | alkanes        | VOCs | Numerical data not available | NA                    | Firepower Sweep Test (FST)                                                           | Vacuum canister fitted with a critical orifice (CS1200ES Sampler; ENTECH Instruments, Inc.; Simi Valley, CA) | Gas chromatograph mass spectrometer (GC-17A); Shimadzu; Kyoto, Japan                                                   | 10.1021/acs.est.8b07019      |
| organic   | n-propylbenzene | aromatics      | VOCs | Numerical data not available | NA                    | Firepower Sweep Test (FST)                                                           | Vacuum canister fitted with a critical orifice (CS1200ES Sampler; ENTECH Instruments, Inc.; Simi Valley, CA) | Gas chromatograph mass spectrometer (GC-17A); Shimadzu; Kyoto, Japan                                                   | 10.1021/acs.est.8b07019      |
| Inorganic | Na              | inorganic ions |      | Numerical data not available | NA                    | Firepower Sweep Test (FST)                                                           |                                                                                                              | CS-3000 Ion Chromatography System; Dionex; Waltham, MA                                                                 | 10.1021/acs.est.8b07019      |
| Inorganic | Na              | inorganic ions |      | 2.0 ± 1.0                    | [mg g <sup>-1</sup> ] | sets of duplicate cooking samples were collected, using the most used 5 types of oil |                                                                                                              | ICP-OES, Vista-MPX, Varian Co, Palo Alta, CA, USA                                                                      | 10.1016/j.envpol.2017.04.033 |
| Inorganic | Na              | inorganic ions |      | 13.5 ± 4.3                   | [mg g <sup>-1</sup> ] | General cooking activities                                                           | 150 mm pure quartz microfibres filters (Fiorini, France)                                                     | Inductively Coupled Plasma-Atomic Emission Spectrometry (ICP-AES, iCAP 6000 series, Thermo Scientific, United Kingdom) | 10.1016/j.envres.2022.113032 |

|           |                 |                |  |           |          |                                                                   |                                                                                           |                                                                                                                                                                                                                                                                                                                                    |                              |
|-----------|-----------------|----------------|--|-----------|----------|-------------------------------------------------------------------|-------------------------------------------------------------------------------------------|------------------------------------------------------------------------------------------------------------------------------------------------------------------------------------------------------------------------------------------------------------------------------------------------------------------------------------|------------------------------|
| Inorganic | Na              | inorganic ions |  | 1046.7    | ng m-3   | Hong Kong based restaurants and two simulated cooking experiments | Teflon-membrane (47 mm), Nuclepore polycarbonate membrane and quartz-fiber filter (47 mm) | The inorganic elements and water soluble ions were analysed by the Energy Dispersive X-ray Fluorescence Analyser (ED-XRF) and ion chromatography system, respectively. The polycyclic aromatic compounds (PACs) in the filters were extracted with organic solvents and determined by gas chromatography-mass spectrometry (GC-MS) | 10.1016/j.envpol.2021.117754 |
| Inorganic | Na <sup>+</sup> | inorganic ions |  | 2.8 ± 1.2 | [mg g-1] | General cooking activities                                        | 150 mm pure quartz microfibre filters (Fiorini, France)                                   | liquid ion chromatography (Dionex™ ICS-900, Thermo Scientific, United Kingdom)                                                                                                                                                                                                                                                     | 10.1016/j.envres.2022.113032 |
| Inorganic | Na <sup>+</sup> | inorganic ions |  | 1.1       | ug m-3   | Hong Kong based restaurants and two simulated cooking experiments | Teflon-membrane (47 mm), Nuclepore polycarbonate membrane and quartz-fiber filter (47 mm) | The inorganic elements and water soluble ions were analysed by the Energy Dispersive X-ray Fluorescence Analyser (ED-XRF) and ion chromatography system, respectively. The polycyclic aromatic compounds (PACs) in the filters were extracted with organic solvents and determined by gas chromatography-mass spectrometry (GC-MS) | 10.1016/j.envpol.2021.117754 |

|         |                        |           |       |                              |        |                                                                   |                                                                                                                                                                                                                      |                                                                                                                                                                                                                                                                                                                                    |                                 |
|---------|------------------------|-----------|-------|------------------------------|--------|-------------------------------------------------------------------|----------------------------------------------------------------------------------------------------------------------------------------------------------------------------------------------------------------------|------------------------------------------------------------------------------------------------------------------------------------------------------------------------------------------------------------------------------------------------------------------------------------------------------------------------------------|---------------------------------|
| organic | Naphthacene-5,12-dione |           | OPAHs | 105.3                        | pg m-3 | Hong Kong based restaurants and two simulated cooking experiments | Teflon-membrane (47 mm), Nuclepore polycarbonate membrane and quartz-fiber filter (47 mm)                                                                                                                            | The inorganic elements and water soluble ions were analysed by the Energy Dispersive X-ray Fluorescence Analyser (ED-XRF) and ion chromatography system, respectively. The polycyclic aromatic compounds (PACs) in the filters were extracted with organic solvents and determined by gas chromatography-mass spectrometry (GC-MS) | 10.1016/j.envpol.2021.117754    |
| organic | naphthalene            | two rings | PAHs  | Numerical data not available | NA     | Firepower Sweep Test (FST)                                        | Particle phase: Tissuquartz #2500QAT-UP; Pall Corporation; Port Washington, NY; Gas phase: PUF Replacement P226-92; SKC-West, Inc; Fullerton, CA (two inline)                                                        | Agilent 6890/5973 Inert, Agilent Technologies, Santa Clara, CA                                                                                                                                                                                                                                                                     | 10.1021/acs.est.8b07019         |
| organic | Naphthalene            | two rings | PAHs  | 767                          | ug g-1 | poultry cooking and grilling                                      | 47 mm diameter quartz fibre filters                                                                                                                                                                                  | chromatography-mass spectrometry (GC-MS)                                                                                                                                                                                                                                                                                           | 10.1016/j.scitotenv.2021.146090 |
| organic | Naphthalene            | two rings | PAH   | Numerical data not available | NA     | ND                                                                | PAHs bounded to PM2.5 were collected on unloaded quartz fiber filters (QFFs, Tissuquartz 2500QAT-UP, PALL Corporation, USA) using a cascade impactor (PEM, SKC, PA, USA) connected to an active pump (SKC, PA, USA). | deuterated standards prior to detection. PAHs was analyzed using a gas chromatograph coupled with a mass spectrometer (GC-MS, Agilent GC 6890, MS 5973, USA) with a HP-5MS capillary column in the electron ionization (EI) mode.                                                                                                  | 10.1016/j.envpol.2020.115592    |

|           |             |                |            |               |          |                                                                                      |                                                                                           |                                                                                                                                                                                                                                                                                                                                    |                                   |
|-----------|-------------|----------------|------------|---------------|----------|--------------------------------------------------------------------------------------|-------------------------------------------------------------------------------------------|------------------------------------------------------------------------------------------------------------------------------------------------------------------------------------------------------------------------------------------------------------------------------------------------------------------------------------|-----------------------------------|
| organic   | Naphthalene | two rings      | PAHs       | 1.93          | ng m-3   | General cooking activities                                                           | 56 mm diameter quartz filters                                                             | GC-MS from Agilent (Santa Clara, CA, USA) with single quadrupole                                                                                                                                                                                                                                                                   | 10.3390/ijerph17145265            |
| organic   | Naphthalene | two rings      | PAHs       | 2983.5        | pg m-3   | Hong Kong based restaurants and two simulated cooking experiments                    | Teflon-membrane (47 mm), Nuclepore polycarbonate membrane and quartz-fiber filter (47 mm) | The inorganic elements and water soluble ions were analysed by the Energy Dispersive X-ray Fluorescence Analyser (ED-XRF) and ion chromatography system, respectively. The polycyclic aromatic compounds (PACs) in the filters were extracted with organic solvents and determined by gas chromatography-mass spectrometry (GC-MS) | 10.1016/j.envpol.2021.117754      |
| organic   | naphthalene | two rings      | PAHs       | 18.4±15.5     | ng m-3   | seven different cuisine types                                                        | quartz-fiber filters                                                                      | solvent extraction-gas chromatography mass spectrometry (SE-GC/MS) method                                                                                                                                                                                                                                                          | 10.1016/j.chemosphere.2020.127758 |
| Inorganic | Nb          | inorganic ions | metal ions | 0.009 ± 0.004 | [mg g-1] | General cooking activities                                                           | 150 mm pure quartz microfibre filters (Fiorini, France)                                   | ICP-Mass Spectrometry (ICP-MS, Agilent 7900, United States of America)                                                                                                                                                                                                                                                             | 10.1016/j.envres.2022.113032      |
| Inorganic | Ni          | inorganic ions | metal ions | 0.006 ± 0.002 | [mg g-1] | sets of duplicate cooking samples were collected, using the most used 5 types of oil | 37 mm polypropylene-fiber filter (Pall-Gelman, Ann Arbor, MI, USA)                        | ICP-MS, Agilent 7500a, Agilent Co, Santa Clara, USA                                                                                                                                                                                                                                                                                | 10.1016/j.envpol.2017.04.033      |
| Inorganic | Ni          | inorganic ions | metal ions | 0.30 ± 0.20   | [mg g-1] | General cooking activities                                                           | 150 mm pure quartz microfibre filters (Fiorini, France)                                   | Inductively Coupled Plasma-Atomic Emission Spectrometry (ICP-AES, iCAP 6000 series, Thermo Scientific, United Kingdom)                                                                                                                                                                                                             | 10.1016/j.envres.2022.113032      |

|           |                                         |                |            |                              |          |                                                                                      |                                                                                           |                                                                                                                                                                                                                                                                                                                                    |                              |
|-----------|-----------------------------------------|----------------|------------|------------------------------|----------|--------------------------------------------------------------------------------------|-------------------------------------------------------------------------------------------|------------------------------------------------------------------------------------------------------------------------------------------------------------------------------------------------------------------------------------------------------------------------------------------------------------------------------------|------------------------------|
| Inorganic | Ni                                      | inorganic ions | metal ions | 6.6                          | ng m-3   | Hong Kong based restaurants and two simulated cooking experiments                    | Teflon-membrane (47 mm), Nuclepore polycarbonate membrane and quartz-fiber filter (47 mm) | The inorganic elements and water soluble ions were analysed by the Energy Dispersive X-ray Fluorescence Analyser (ED-XRF) and ion chromatography system, respectively. The polycyclic aromatic compounds (PACs) in the filters were extracted with organic solvents and determined by gas chromatography-mass spectrometry (GC-MS) | 10.1016/j.envpol.2021.117754 |
| Inorganic | Nitrate (NO <sub>3</sub> <sup>-</sup> ) | inorganic ions |            | Numerical data not available | NA       | Firepower Sweep Test (FST)                                                           |                                                                                           | DX-500 Ion Chromatography System; Dionex; Waltham, MA                                                                                                                                                                                                                                                                              | 10.1021/acs.est.8b07019      |
| Inorganic | Nitrate (NO <sub>3</sub> <sup>-</sup> ) | inorganic ions |            | Numerical data not available | NA       | Firepower Sweep Test (FST)                                                           |                                                                                           | DX-500 Ion Chromatography System; Dionex; Waltham, MA                                                                                                                                                                                                                                                                              | 10.1021/acs.est.8b07019      |
| Inorganic | Nitrate (NO <sub>3</sub> <sup>-</sup> ) | inorganic ions |            | 1.6 ± 0.0                    | [mg g-1] | sets of duplicate cooking samples were collected, using the most used 5 types of oil |                                                                                           | ion chromatograph method (DX-120, Dionex Ltd., Sunnyvale, CA, USA)                                                                                                                                                                                                                                                                 | 10.1016/j.envpol.2017.04.033 |
| Inorganic | Nitrate (NO <sub>3</sub> <sup>-</sup> ) | inorganic ions |            | 22.2 ± 1.8                   | [mg g-1] | General cooking activities                                                           | 150 mm pure quartz microfibres filters (Fiorini, France)                                  | liquid ion chromatography (Dionex™ ICS-900, Thermo Scientific, United Kingdom)                                                                                                                                                                                                                                                     | 10.1016/j.envres.2022.113032 |

|           |                                 |                |  |             |          |                                                                   |                                                                                           |                                                                                                                                                                                                                                                                                                                                    |                                   |
|-----------|---------------------------------|----------------|--|-------------|----------|-------------------------------------------------------------------|-------------------------------------------------------------------------------------------|------------------------------------------------------------------------------------------------------------------------------------------------------------------------------------------------------------------------------------------------------------------------------------------------------------------------------------|-----------------------------------|
| Inorganic | Nitrate (NO <sub>3</sub> )      | inorganic ions |  | 23.9        | ug m-3   | Hong Kong based restaurants and two simulated cooking experiments | Teflon-membrane (47 mm), Nuclepore polycarbonate membrane and quartz-fiber filter (47 mm) | The inorganic elements and water soluble ions were analysed by the Energy Dispersive X-ray Fluorescence Analyser (ED-XRF) and ion chromatography system, respectively. The polycyclic aromatic compounds (PACs) in the filters were extracted with organic solvents and determined by gas chromatography-mass spectrometry (GC-MS) | 10.1016/j.envpol.2021.117754      |
| organic   | nonacosane (n-C <sub>29</sub> ) | alcanes        |  | 0.89 ± 0.39 | [mg g-1] | General cooking activities                                        | 150 mm pure quartz microfibre filters (Fiorini, France)                                   | high-resolution gas chromatography coupled to a high-resolution mass spectrometer (HRGC/HRMS).                                                                                                                                                                                                                                     | 10.1016/j.envres.2022.113032      |
| organic   | nonacosane (n-C <sub>29</sub> ) | alcanes        |  | 26.7±19.4   | ng m-3   | seven different cuisine types                                     | quartz-fiber filters                                                                      | solvent extraction-gas chromatography mass spectrometry (SE-GC/MS) method                                                                                                                                                                                                                                                          | 10.1016/j.chemosphere.2020.127758 |
| organic   | nonadecane (n-C <sub>19</sub> ) | alcanes        |  | 0.07 ± 0.04 | [mg g-1] | General cooking activities                                        | 150 mm pure quartz microfibre filters (Fiorini, France)                                   | high-resolution gas chromatography coupled to a high-resolution mass spectrometer (HRGC/HRMS).                                                                                                                                                                                                                                     | 10.1016/j.envres.2022.113032      |
| organic   | nonadecane (n-C <sub>19</sub> ) | alcanes        |  | 8.2±8.2     | ng m-3   | seven different cuisine types                                     | quartz-fiber filters                                                                      | solvent extraction-gas chromatography mass spectrometry (SE-GC/MS) method                                                                                                                                                                                                                                                          | 10.1016/j.chemosphere.2020.127758 |

|         |                                      |                       |           |                              |        |                                                                   |                                                                                                                                                                                                                 |                                                                                                                                                                                                                                                                                                                                    |                                   |
|---------|--------------------------------------|-----------------------|-----------|------------------------------|--------|-------------------------------------------------------------------|-----------------------------------------------------------------------------------------------------------------------------------------------------------------------------------------------------------------|------------------------------------------------------------------------------------------------------------------------------------------------------------------------------------------------------------------------------------------------------------------------------------------------------------------------------------|-----------------------------------|
| organic | nonadecanoic acid (C <sub>19</sub> ) | saturated fatty acids |           | 35.1±31.3                    | ng m-3 | seven different cuisine types                                     | quartz-fiber filters                                                                                                                                                                                            | solvent extraction-gas chromatography mass spectrometry (SE-GC/MS) method                                                                                                                                                                                                                                                          | 10.1016/j.chemosphere.2020.127758 |
| organic | Nonaldehyde (C9)                     |                       | Carbonyls |                              | pg m-3 | Hong Kong based restaurants and two simulated cooking experiments | Teflon-membrane (47 mm), Nuclepore polycarbonate membrane and quartz-fiber filter (47 mm)                                                                                                                       | The inorganic elements and water soluble ions were analysed by the Energy Dispersive X-ray Fluorescence Analyser (ED-XRF) and ion chromatography system, respectively. The polycyclic aromatic compounds (PACs) in the filters were extracted with organic solvents and determined by gas chromatography-mass spectrometry (GC-MS) | 10.1016/j.envpol.2021.117754      |
| organic | nonanoic acid (C <sub>9</sub> )      | saturated fatty acids |           | 122.9±100.6                  | ng m-3 | seven different cuisine types                                     | quartz-fiber filters                                                                                                                                                                                            | solvent extraction-gas chromatography mass spectrometry (SE-GC/MS) method                                                                                                                                                                                                                                                          | 10.1016/j.chemosphere.2020.127758 |
| organic | o-tolualdehyde                       | aromatic aldehydes    |           | Numerical data not available | NA     | Firepower Sweep Test (FST)                                        | Dinitrophenylhydrazine cartridge (Sep-Pak DNPH-Silica Cartridge; Waters Corp; Milford, MA) placed inline behind an ozone scrubber (Sep-Pak Ozone Scrubber Potassium Iodide Cartridge; Waters Corp; Milford, MA) | HPLC 1050 series; Agilent Technologies; Santa Clara, CA                                                                                                                                                                                                                                                                            | 10.1021/acs.est.8b07019           |

|         |                                      |                                                     |  |                     |                       |                               |                                                          |                                                                                                |                                   |
|---------|--------------------------------------|-----------------------------------------------------|--|---------------------|-----------------------|-------------------------------|----------------------------------------------------------|------------------------------------------------------------------------------------------------|-----------------------------------|
| organic | Octacosane                           | alkanes                                             |  | $0.34 \pm 0.15$     | [mg g <sup>-1</sup> ] | General cooking activities    | 150 mm pure quartz microfibres filters (Fiorini, France) | high-resolution gas chromatography coupled to a high-resolution mass spectrometer (HRGC/HRMS). | 10.1016/j.envres.2022.113032      |
| organic | octacosane (n-C <sub>28</sub> )      | alkanes                                             |  | $9.1 \pm 12.5$      | ng m <sup>-3</sup>    | seven different cuisine types | quartz-fiber filters                                     | solvent extraction-gas chromatography mass spectrometry (SE-GC/MS) method                      | 10.1016/j.chemosphere.2020.127758 |
| organic | Octacosanol                          | Alcohols, sterols and other compounds with OH group |  | 0,151               | ug g <sup>-1</sup>    | poultry cooking and grilling  | 47 mm diameter quartz fibre filters                      | chromatography-mass spectrometry (GC-MS)                                                       | 10.1016/j.scitotenv.2021.146090   |
| organic | Octadecane                           | alkanes                                             |  | $0.06 \pm 0.09$     | [mg g <sup>-1</sup> ] | General cooking activities    | 150 mm pure quartz microfibres filters (Fiorini, France) | high-resolution gas chromatography coupled to a high-resolution mass spectrometer (HRGC/HRMS). | 10.1016/j.envres.2022.113032      |
| organic | octadecane (n-C <sub>18</sub> )      | alkanes                                             |  | $4.6 \pm 5.1$       | ng m <sup>-3</sup>    | seven different cuisine types | quartz-fiber filters                                     | solvent extraction-gas chromatography mass spectrometry (SE-GC/MS) method                      | 10.1016/j.chemosphere.2020.127758 |
| organic | Octadecanoic acid                    | carboxylic acids                                    |  | 28,5                | ug g <sup>-1</sup>    | poultry cooking and grilling  | 47 mm diameter quartz fibre filters                      | chromatography-mass spectrometry (GC-MS)                                                       | 10.1016/j.scitotenv.2021.146090   |
| organic | Octadecanoic acid                    | carboxylic acids                                    |  | $109 \pm 48$        | [mg g <sup>-1</sup> ] | General cooking activities    | 150 mm pure quartz microfibres filters (Fiorini, France) | high-resolution gas chromatography coupled to a high-resolution mass spectrometer (HRGC/HRMS). | 10.1016/j.envres.2022.113032      |
| organic | octadecanoic acid (C <sub>18</sub> ) | saturated fatty acids                               |  | $3386.2 \pm 2117.8$ | ng m <sup>-3</sup>    | seven different cuisine types | quartz-fiber filters                                     | solvent extraction-gas chromatography mass spectrometry (SE-GC/MS) method                      | 10.1016/j.chemosphere.2020.127758 |

|           |                                 |                         |           |               |          |                                                                                      |                                                                                           |                                                                                                                                                                                                                                                                                                                                    |                                   |
|-----------|---------------------------------|-------------------------|-----------|---------------|----------|--------------------------------------------------------------------------------------|-------------------------------------------------------------------------------------------|------------------------------------------------------------------------------------------------------------------------------------------------------------------------------------------------------------------------------------------------------------------------------------------------------------------------------------|-----------------------------------|
| organic   | Octaldehyde (C <sub>8</sub> )   |                         | Carbonyls |               | pg m-3   | Hong Kong based restaurants and two simulated cooking experiments                    | Teflon-membrane (47 mm), Nuclepore polycarbonate membrane and quartz-fiber filter (47 mm) | The inorganic elements and water soluble ions were analysed by the Energy Dispersive X-ray Fluorescence Analyser (ED-XRF) and ion chromatography system, respectively. The polycyclic aromatic compounds (PACs) in the filters were extracted with organic solvents and determined by gas chromatography-mass spectrometry (GC-MS) | 10.1016/j.envpol.2021.117754      |
| organic   | octanoic acid (C <sub>8</sub> ) | saturated fatty acids   |           | 69.6±105.5    | ng m-3   | seven different cuisine types                                                        | quartz-fiber filters                                                                      | solvent extraction-gas chromatography mass spectrometry (SE-GC/MS) method                                                                                                                                                                                                                                                          | 10.1016/j.chemosphere.2020.127758 |
| organic   | Oleic acid (C <sub>18:1</sub> ) | carboxylic acids        |           | 11,5          | ug g-1   | poultry cooking and grilling                                                         | 47 mm diameter quartz fibre filters                                                       | chromatography-mass spectrometry (GC-MS)                                                                                                                                                                                                                                                                                           | 10.1016/j.scitotenv.2021.146090   |
| organic   | oleic acid (C <sub>18:1</sub> ) | Unsaturated fatty acids |           | 9820.7±6106.8 | ng m-3   | seven different cuisine types                                                        | quartz-fiber filters                                                                      | solvent extraction-gas chromatography mass spectrometry (SE-GC/MS) method                                                                                                                                                                                                                                                          | 10.1016/j.chemosphere.2020.127758 |
| Inorganic | P                               | inorganic ions          |           | 0.16 ± 0.02   | [mg g-1] | sets of duplicate cooking samples were collected, using the most used 5 types of oil |                                                                                           | ICP-OES, Vista-MPX, Varian Co, Palo Alta, CA, USA                                                                                                                                                                                                                                                                                  | 10.1016/j.envpol.2017.04.033      |
| Inorganic | P                               | inorganic ions          |           | 0.83 ± 0.16   | [mg g-1] | General cooking activities                                                           | 150 mm pure quartz microfibres filters (Fiorini, France)                                  | Inductively Coupled Plasma-Atomic Emission Spectrometry (ICP-AES, iCAP 6000 series, Thermo Scientific, United Kingdom)                                                                                                                                                                                                             | 10.1016/j.envres.2022.113032      |

|           |                                       |                  |            |               |          |                                                                                      |                                                                                                                               |                                                                                                                                                                                                                                                                                                                                    |                                 |
|-----------|---------------------------------------|------------------|------------|---------------|----------|--------------------------------------------------------------------------------------|-------------------------------------------------------------------------------------------------------------------------------|------------------------------------------------------------------------------------------------------------------------------------------------------------------------------------------------------------------------------------------------------------------------------------------------------------------------------------|---------------------------------|
| organic   | <i>p</i> -Terphenyl                   | three rings      | PAHs       | 2,95          | ug g-1   | poultry cooking and grilling                                                         | 47 mm diameter quartz fibre filters                                                                                           | chromatography–mass spectrometry (GC–MS)                                                                                                                                                                                                                                                                                           | 10.1016/j.scitotenv.2021.146090 |
| organic   | Palmitoleic acid (C <sub>16:1</sub> ) | carboxylic acids |            | 6,89          | ug g-1   | poultry cooking and grilling                                                         | 47 mm diameter quartz fibre filters                                                                                           | chromatography–mass spectrometry (GC–MS)                                                                                                                                                                                                                                                                                           | 10.1016/j.scitotenv.2021.146090 |
| Inorganic | Pb                                    | inorganic ions   | metal ions | 0.016 ± 0.005 | [mg g-1] | sets of duplicate cooking samples were collected, using the most used 5 types of oil | 37 mm polypropylene-fiber filter (Pall-Gelman, Ann Arbor, MI, USA)                                                            | ICP-MS, Agilent 7500a, Agilent Co, Santa Clara, USA                                                                                                                                                                                                                                                                                | 10.1016/j.envpol.2017.04.033    |
| Inorganic | Pb                                    | inorganic ions   | metal ions | 0,052         | ug m-3   | General cooking activities                                                           | cellulose/PTFE collection filters fitted in the cyclones of size-selective inlets of diameter 2.5 µm connected to the sampler | ICP-OES (8300 Perkin Elmer, USA)                                                                                                                                                                                                                                                                                                   | 10.1007/s42452-020-03800-0      |
| Inorganic | Pb                                    | inorganic ions   |            | 0.55 ± 0.11   | [mg g-1] | General cooking activities                                                           | 150 mm pure quartz microfibre filters (Fiorini, France)                                                                       | Inductively Coupled Plasma-Atomic Emission Spectrometry (ICP-AES, iCAP 6000 series, Thermo Scientific, United Kingdom)                                                                                                                                                                                                             | 10.1016/j.envres.2022.113032    |
| Inorganic | Pb                                    | inorganic ions   | metal ions | 38.6          | ng m-3   | Hong Kong based restaurants and two simulated cooking experiments                    | Teflon-membrane (47 mm), Nuclepore polycarbonate membrane and quartz-fiber filter (47 mm)                                     | The inorganic elements and water soluble ions were analysed by the Energy Dispersive X-ray Fluorescence Analyser (ED-XRF) and ion chromatography system, respectively. The polycyclic aromatic compounds (PACs) in the filters were extracted with organic solvents and determined by gas chromatography–mass spectrometry (GC-MS) | 10.1016/j.envpol.2021.117754    |

|         |                                       |                                                     |      |                              |                       |                               |                                                                                                                                                               |                                                                                                |                                   |
|---------|---------------------------------------|-----------------------------------------------------|------|------------------------------|-----------------------|-------------------------------|---------------------------------------------------------------------------------------------------------------------------------------------------------------|------------------------------------------------------------------------------------------------|-----------------------------------|
| organic | Pentacosane                           | alcanes                                             |      | 0.55 ± 0.29                  | [mg g <sup>-1</sup> ] | General cooking activities    | 150 mm pure quartz microfibre filters (Fiorini, France)                                                                                                       | high-resolution gas chromatography coupled to a high-resolution mass spectrometer (HRGC/HRMS). | 10.1016/j.envres.2022.113032      |
| organic | pentacosane (n-C <sub>25</sub> )      | alcanes                                             |      | 22.0±12.7                    | ng m <sup>-3</sup>    | seven different cuisine types | quartz-fiber filters                                                                                                                                          | solvent extraction-gas chromatography mass spectrometry (SE-GC/MS) method                      | 10.1016/j.chemosphere.2020.127758 |
| organic | pentacosanoic acid (C <sub>25</sub> ) | saturated fatty acids                               |      | 8.1±5.9                      | ng m <sup>-3</sup>    | seven different cuisine types | quartz-fiber filters                                                                                                                                          | solvent extraction-gas chromatography mass spectrometry (SE-GC/MS) method                      | 10.1016/j.chemosphere.2020.127758 |
| organic | Pentacosanol                          | Alcohols, sterols and other compounds with OH group |      | 0,093                        | ug g <sup>-1</sup>    | poultry cooking and grilling  | 47 mm diameter quartz fibre filters                                                                                                                           | chromatography–mass spectrometry (GC–MS)                                                       | 10.1016/j.scitotenv.2021.146090   |
| organic | pentadecane (n-C <sub>15</sub> )      | alcanes                                             |      | 2.6±2.2                      | ng m <sup>-3</sup>    | seven different cuisine types | quartz-fiber filters                                                                                                                                          | solvent extraction-gas chromatography mass spectrometry (SE-GC/MS) method                      | 10.1016/j.chemosphere.2020.127758 |
| organic | pentadecanoic acid (C <sub>15</sub> ) | saturated fatty acids                               |      | 84.0±49.3                    | ng m <sup>-3</sup>    | seven different cuisine types | quartz-fiber filters                                                                                                                                          | solvent extraction-gas chromatography mass spectrometry (SE-GC/MS) method                      | 10.1016/j.chemosphere.2020.127758 |
| organic | Pentadecanol                          | Alcohols, sterols and other compounds with OH group |      | 0,033                        | ug g <sup>-1</sup>    | poultry cooking and grilling  | 47 mm diameter quartz fibre filters                                                                                                                           | chromatography–mass spectrometry (GC–MS)                                                       | 10.1016/j.scitotenv.2021.146090   |
| organic | perylene                              | five rings                                          | PAHs | Numerical data not available | NA                    | Firepower Sweep Test (FST)    | Particle phase: Tissuquartz #2500QAT-UP; Pall Corporation; Port Washington, NY; Gas phase: PUF Replacement P226-92; SKC-West, Inc; Fullerton, CA (two inline) | Agilent 6890/5973 Inert, Agilent Technologies, Santa Clara, CA                                 | 10.1021/acs.est.8b07019           |
| organic | Perylene                              | five rings                                          | PAHs | 0,132                        | ug g <sup>-1</sup>    | poultry cooking and grilling  | 47 mm diameter quartz fibre filters                                                                                                                           | chromatography–mass spectrometry (GC–MS)                                                       | 10.1016/j.scitotenv.2021.146090   |

|         |          |            |      |                              |        |                                                                   |                                                                                                                                                                                                                      |                                                                                                                                                                                                                                                                                                                                    |                                   |
|---------|----------|------------|------|------------------------------|--------|-------------------------------------------------------------------|----------------------------------------------------------------------------------------------------------------------------------------------------------------------------------------------------------------------|------------------------------------------------------------------------------------------------------------------------------------------------------------------------------------------------------------------------------------------------------------------------------------------------------------------------------------|-----------------------------------|
| organic | Perylene | five rings | PAHs | Numerical data not available | NA     | ND                                                                | PAHs bounded to PM2.5 were collected on unloaded quartz fiber filters (QFFs, Tissuquartz 2500QAT-UP, PALL Corporation, USA) using a cascade impactor (PEM, SKC, PA, USA) connected to an active pump (SKC, PA, USA). | deuterated standards prior to detection. PAHs was analyzed using a gas chromatograph coupled with a mass spectrometer (GC-MS, Agilent GC 6890, MS 5973, USA) with a HP-5MS capillary column in the electron ionization (EI) mode.                                                                                                  | 10.1016/j.envpol.2020.115592      |
| organic | Perylene | five rings | PAHs | 0,314                        | ng m-3 | General cooking activities                                        | 73 mm diameter quartz filters                                                                                                                                                                                        | GC-MS from Agilent (Santa Clara, CA, USA) with single quadrupole                                                                                                                                                                                                                                                                   | 10.3390/ijerph17145282            |
| organic | perylene | five rings | PAHs | 2.1±2.2                      | ng m-3 | seven different cuisine types                                     | quartz-fiber filters                                                                                                                                                                                                 | solvent extraction-gas chromatography mass spectrometry (SE-GC/MS) method                                                                                                                                                                                                                                                          | 10.1016/j.chemosphere.2020.127758 |
| organic | Perylene | five rings | PAHs | 42.1                         | pg m-3 | Hong Kong based restaurants and two simulated cooking experiments | Teflon-membrane (47 mm), Nuclepore polycarbonate membrane and quartz-fiber filter (47 mm)                                                                                                                            | The inorganic elements and water soluble ions were analysed by the Energy Dispersive X-ray Fluorescence Analyser (ED-XRF) and ion chromatography system, respectively. The polycyclic aromatic compounds (PACs) in the filters were extracted with organic solvents and determined by gas chromatography-mass spectrometry (GC-MS) | 10.1016/j.envpol.2021.117754      |

|         |              |             |      |                              |                       |                                                                                      |                                                                                                                                                                                                                                  |                                                                                                                                                                                                                                   |                                 |
|---------|--------------|-------------|------|------------------------------|-----------------------|--------------------------------------------------------------------------------------|----------------------------------------------------------------------------------------------------------------------------------------------------------------------------------------------------------------------------------|-----------------------------------------------------------------------------------------------------------------------------------------------------------------------------------------------------------------------------------|---------------------------------|
| organic | phenanthrene | three rings | PAHs | 0.006 ± 0.001                | [mg g <sup>-1</sup> ] | sets of duplicate cooking samples were collected, using the most used 5 types of oil | quartz fiber filter (Pall-Gelman, Ann Arbor, MI, USA)                                                                                                                                                                            | gas chromatography coupled with mass spectrometry method (GC/MS, trace 2000 GC-MS, Thermo Finnigan, USA)                                                                                                                          | 10.1016/j.envpol.2017.04.033    |
| organic | phenanthrene | three rings | PAHs | Numerical data not available | NA                    | Firepower Sweep Test (FST)                                                           | Particle phase: Tissuquartz #2500QAT-UP; Pall Corporation; Port Washington, NY; Gas phase: PUF Replacement P226-92; SKC-West, Inc; Fullerton, CA (two inline)                                                                    | Agilent 6890/5973 Inert, Agilent Technologies, Santa Clara, CA                                                                                                                                                                    | 10.1021/acs.est.8b07019         |
| organic | Phenanthrene | three rings | PAHs | 63.1                         | ug g <sup>-1</sup>    | poultry cooking and grilling                                                         | 47 mm diameter quartz fibre filters                                                                                                                                                                                              | chromatography-mass spectrometry (GC-MS)                                                                                                                                                                                          | 10.1016/j.scitotenv.2021.146090 |
| organic | Phenanthrene | three rings | PAH  | Numerical data not available | NA                    | ND                                                                                   | PAHs bounded to PM <sub>2.5</sub> were collected on unloaded quartz fiber filters (QFFs, Tissuquartz 2500QAT-UP, PALL Corporation, USA) using a cascade impactor (PEM, SKC, PA, USA) connected to an active pump (SKC, PA, USA). | deuterated standards prior to detection. PAHs was analyzed using a gas chromatograph coupled with a mass spectrometer (GC-MS, Agilent GC 6890, MS 5973, USA) with a HP-5MS capillary column in the electron ionization (EI) mode. | 10.1016/j.envpol.2020.115592    |
| organic | Phenanthrene | three rings | PAHs | 0.0415                       | ng m <sup>-3</sup>    | General cooking activities                                                           | 60 mm diameter quartz filters                                                                                                                                                                                                    | GC-MS from Agilent (Santa Clara, CA, USA) with single quadrupole                                                                                                                                                                  | 10.3390/ijerph17145269          |
| organic | Phenanthrene | three rings | PAHs | 0.003 ± 0.003                | [mg g <sup>-1</sup> ] | General cooking activities                                                           | 150 mm pure quartz microfibre filters (Fiorini, France)                                                                                                                                                                          | high-resolution gas chromatography coupled to a high-resolution mass spectrometer (HRGC/HRMS).                                                                                                                                    | 10.1016/j.envres.2022.113032    |

|         |                     |                    |      |                              |        |                                                                   |                                                                                                              |                                                                                                                                                                                                                                                                                                                                    |                                   |
|---------|---------------------|--------------------|------|------------------------------|--------|-------------------------------------------------------------------|--------------------------------------------------------------------------------------------------------------|------------------------------------------------------------------------------------------------------------------------------------------------------------------------------------------------------------------------------------------------------------------------------------------------------------------------------------|-----------------------------------|
| organic | phenanthrene        | three rings        | PAHs | 16.0±6.0                     | ng m-3 | seven different cuisine types                                     | quartz-fiber filters                                                                                         | solvent extraction-gas chromatography mass spectrometry (SE-GC/MS) method                                                                                                                                                                                                                                                          | 10.1016/j.chemosphere.2020.127758 |
| organic | Phenanthrene        | three rings        | PAHs | 2150.5                       | pg m-3 | Hong Kong based restaurants and two simulated cooking experiments | Teflon-membrane (47 mm), Nuclepore polycarbonate membrane and quartz-fiber filter (47 mm)                    | The inorganic elements and water soluble ions were analysed by the Energy Dispersive X-ray Fluorescence Analyser (ED-XRF) and ion chromatography system, respectively. The polycyclic aromatic compounds (PACs) in the filters were extracted with organic solvents and determined by gas chromatography-mass spectrometry (GC-MS) | 10.1016/j.envpol.2021.117754      |
| organic | phthalic acid (1,2) | Dicarboxylic acids |      | 19.0±19.8                    | ng m-3 | seven different cuisine types                                     | quartz-fiber filters                                                                                         | solvent extraction-gas chromatography mass spectrometry (SE-GC/MS) method                                                                                                                                                                                                                                                          | 10.1016/j.chemosphere.2020.127758 |
| organic | pimelic acid (C7)   | Dicarboxylic acids |      | 52.4±47.6                    | ng m-3 | seven different cuisine types                                     | quartz-fiber filters                                                                                         | solvent extraction-gas chromatography mass spectrometry (SE-GC/MS) method                                                                                                                                                                                                                                                          | 10.1016/j.chemosphere.2020.127758 |
| organic | propane             | alkanes            | VOCs | Numerical data not available | NA     | Firepower Sweep Test (FST)                                        | Vacuum canister fitted with a critical orifice (CS1200ES Sampler; ENTECH Instruments, Inc.; Simi Valley, CA) | Gas chromatograph mass spectrometer (GC-17A); Shimadzu; Kyoto, Japan                                                                                                                                                                                                                                                               | 10.1021/acs.est.8b07019           |
| organic | propene             | alkenes            |      | Numerical data not available | NA     | Firepower Sweep Test (FST)                                        |                                                                                                              |                                                                                                                                                                                                                                                                                                                                    | 10.1021/acs.est.8b07019           |

|         |        |            |      |                              |                       |                                                                                      |                                                                                                                                                                                                                                  |                                                                                                                                                                                                                                   |                                 |
|---------|--------|------------|------|------------------------------|-----------------------|--------------------------------------------------------------------------------------|----------------------------------------------------------------------------------------------------------------------------------------------------------------------------------------------------------------------------------|-----------------------------------------------------------------------------------------------------------------------------------------------------------------------------------------------------------------------------------|---------------------------------|
| organic | pyrene | four rings | PAHs | 0.005 ± 0.002                | [mg g <sup>-1</sup> ] | sets of duplicate cooking samples were collected, using the most used 5 types of oil | quartz fiber filter (Pall-Gelman, Ann Arbor, MI, USA)                                                                                                                                                                            | gas chromatography coupled with mass spectrometry method (GC/MS, trace 2000 GC-MS, Thermo Finnigan, USA)                                                                                                                          | 10.1016/j.envpol.2017.04.033    |
| organic | pyrene | four rings | PAHs | Numerical data not available | NA                    | Firepower Sweep Test (FST)                                                           | Particle phase: Tissuquartz #2500QAT-UP; Pall Corporation; Port Washington, NY; Gas phase: PUF Replacement P226-92; SKC-West, Inc; Fullerton, CA (two inline)                                                                    | Agilent 6890/5973 Inert, Agilent Technologies, Santa Clara, CA                                                                                                                                                                    | 10.1021/acs.est.8b07019         |
| organic | Pyrene | four rings | PAHs | 40                           | ug g <sup>-1</sup>    | poultry cooking and grilling                                                         | 47 mm diameter quartz fibre filters                                                                                                                                                                                              | chromatography-mass spectrometry (GC-MS)                                                                                                                                                                                          | 10.1016/j.scitotenv.2021.146090 |
| organic | Pyrene | four rings | PAH  | Numerical data not available | NA                    | ND                                                                                   | PAHs bounded to PM <sub>2.5</sub> were collected on unloaded quartz fiber filters (QFFs, Tissuquartz 2500QAT-UP, PALL Corporation, USA) using a cascade impactor (PEM, SKC, PA, USA) connected to an active pump (SKC, PA, USA). | deuterated standards prior to detection. PAHs was analyzed using a gas chromatograph coupled with a mass spectrometer (GC-MS, Agilent GC 6890, MS 5973, USA) with a HP-5MS capillary column in the electron ionization (EI) mode. | 10.1016/j.envpol.2020.115592    |
| organic | Pyrene | four rings | PAHs | 0,188                        | ng m <sup>-3</sup>    | General cooking activities                                                           | 63 mm diameter quartz filters                                                                                                                                                                                                    | GC-MS from Agilent (Santa Clara, CA, USA) with single quadrupole                                                                                                                                                                  | 10.3390/ijerph17145272          |
| organic | Pyrene | four rings | PAHs | 0.02 ± 0.01                  | [mg g <sup>-1</sup> ] | General cooking activities                                                           | 150 mm pure quartz microfibres filters (Fiorini, France)                                                                                                                                                                         | high-resolution gas chromatography coupled to a high-resolution mass spectrometer (HRGC/HRMS).                                                                                                                                    | 10.1016/j.envres.2022.113032    |

|         |           |            |           |           |        |                                                                   |                                                                                           |                                                                                                                                                                                                                                                                                                                                    |                                   |
|---------|-----------|------------|-----------|-----------|--------|-------------------------------------------------------------------|-------------------------------------------------------------------------------------------|------------------------------------------------------------------------------------------------------------------------------------------------------------------------------------------------------------------------------------------------------------------------------------------------------------------------------------|-----------------------------------|
| organic | pyrene    | four rings | PAHs      | 31.5±24.1 | ng m-3 | seven different cuisine types                                     | quartz-fiber filters                                                                      | solvent extraction-gas chromatography mass spectrometry (SE-GC/MS) method                                                                                                                                                                                                                                                          | 10.1016/j.chemosphere.2020.127758 |
| organic | Pyrene    | four rings | PAHs      | 1917.8    | pg m-3 | Hong Kong based restaurants and two simulated cooking experiments | Teflon-membrane (47 mm), Nuclepore polycarbonate membrane and quartz-fiber filter (47 mm) | The inorganic elements and water soluble ions were analysed by the Energy Dispersive X-ray Fluorescence Analyser (ED-XRF) and ion chromatography system, respectively. The polycyclic aromatic compounds (PACs) in the filters were extracted with organic solvents and determined by gas chromatography-mass spectrometry (GC-MS) | 10.1016/j.envpol.2021.117754      |
| organic | Quinoline |            | Azaarenes | 97.9      | pg m-3 | Hong Kong based restaurants and two simulated cooking experiments | Teflon-membrane (47 mm), Nuclepore polycarbonate membrane and quartz-fiber filter (47 mm) | The inorganic elements and water soluble ions were analysed by the Energy Dispersive X-ray Fluorescence Analyser (ED-XRF) and ion chromatography system, respectively. The polycyclic aromatic compounds (PACs) in the filters were extracted with organic solvents and determined by gas chromatography-mass spectrometry (GC-MS) | 10.1016/j.envpol.2021.117754      |

|           |        |                |      |                              |                       |                               |                                                                                                                                                                                                                      |                                                                                                                                                                                                                                   |                                   |
|-----------|--------|----------------|------|------------------------------|-----------------------|-------------------------------|----------------------------------------------------------------------------------------------------------------------------------------------------------------------------------------------------------------------|-----------------------------------------------------------------------------------------------------------------------------------------------------------------------------------------------------------------------------------|-----------------------------------|
| Inorganic | Rb     | inorganic ions |      | 0.007 ± 0.003                | [mg g <sup>-1</sup> ] | General cooking activities    | 150 mm pure quartz microfibres filters (Fiorini, France)                                                                                                                                                             | ICP-Mass Spectrometry (ICP-MS, Agilent 7900, United States of America)                                                                                                                                                            | 10.1016/j.envres.2022.113032      |
| organic   | Retene | three rings    | PAHs | 1,56                         | ug g <sup>-1</sup>    | poultry cooking and grilling  | 47 mm diameter quartz fibre filters                                                                                                                                                                                  | chromatography-mass spectrometry (GC-MS)                                                                                                                                                                                          | 10.1016/j.scitotenv.2021.146090   |
| organic   | Retene | three rings    | PAH  | Numerical data not available | NA                    | ND                            | PAHs bounded to PM2.5 were collected on unloaded quartz fiber filters (QFFs, Tissuquartz 2500QAT-UP, PALL Corporation, USA) using a cascade impactor (PEM, SKC, PA, USA) connected to an active pump (SKC, PA, USA). | deuterated standards prior to detection. PAHs was analyzed using a gas chromatograph coupled with a mass spectrometer (GC-MS, Agilent GC 6890, MS 5973, USA) with a HP-5MS capillary column in the electron ionization (EI) mode. | 10.1016/j.envpol.2020.115592      |
| organic   | Retene | three rings    | PAHs | 0,136                        | ng m <sup>-3</sup>    | General cooking activities    | 65 mm diameter quartz filters                                                                                                                                                                                        | GC-MS from Agilent (Santa Clara, CA, USA) with single quadrupole                                                                                                                                                                  | 10.3390/ijerph17145274            |
| organic   | retene | three rings    | PAHs | 13.4±6.3                     | ng m <sup>-3</sup>    | seven different cuisine types | quartz-fiber filters                                                                                                                                                                                                 | solvent extraction-gas chromatography mass spectrometry (SE-GC/MS) method                                                                                                                                                         | 10.1016/j.chemosphere.2020.127758 |

|           |        |                |      |             |          |                                                                   |                                                                                           |                                                                                                                                                                                                                                                                                                                                    |                              |
|-----------|--------|----------------|------|-------------|----------|-------------------------------------------------------------------|-------------------------------------------------------------------------------------------|------------------------------------------------------------------------------------------------------------------------------------------------------------------------------------------------------------------------------------------------------------------------------------------------------------------------------------|------------------------------|
| organic   | Retene | three rings    | PAHs | 2210.6      | pg m-3   | Hong Kong based restaurants and two simulated cooking experiments | Teflon-membrane (47 mm), Nuclepore polycarbonate membrane and quartz-fiber filter (47 mm) | The inorganic elements and water soluble ions were analysed by the Energy Dispersive X-ray Fluorescence Analyser (ED-XRF) and ion chromatography system, respectively. The polycyclic aromatic compounds (PACs) in the filters were extracted with organic solvents and determined by gas chromatography-mass spectrometry (GC-MS) | 10.1016/j.envpol.2021.117754 |
| Inorganic | S      | inorganic ions |      | 41.8 ± 19.5 | [mg g-1] | General cooking activities                                        | 150 mm pure quartz microfibre filters (Fiorini, France)                                   | Inductively Coupled Plasma-Atomic Emission Spectrometry (ICP-AES, iCAP 6000 series, Thermo Scientific, United Kingdom)                                                                                                                                                                                                             | 10.1016/j.envres.2022.113032 |
| Inorganic | S      | inorganic ions |      | 3459.0      | ng m-3   | Hong Kong based restaurants and two simulated cooking experiments | Teflon-membrane (47 mm), Nuclepore polycarbonate membrane and quartz-fiber filter (47 mm) | The inorganic elements and water soluble ions were analysed by the Energy Dispersive X-ray Fluorescence Analyser (ED-XRF) and ion chromatography system, respectively. The polycyclic aromatic compounds (PACs) in the filters were extracted with organic solvents and determined by gas chromatography-mass spectrometry (GC-MS) | 10.1016/j.envpol.2021.117754 |

|           |                                 |                       |            |             |                       |                                                                   |                                                                                           |                                                                                                                                                                                                                                                                                                                                    |                                   |
|-----------|---------------------------------|-----------------------|------------|-------------|-----------------------|-------------------------------------------------------------------|-------------------------------------------------------------------------------------------|------------------------------------------------------------------------------------------------------------------------------------------------------------------------------------------------------------------------------------------------------------------------------------------------------------------------------------|-----------------------------------|
| Inorganic | Sb                              | inorganic ions        | metal ions | 0.02 ± 0.01 | [mg g <sup>-1</sup> ] | General cooking activities                                        | 150 mm pure quartz microfibres filters (Fiorini, France)                                  | ICP-Mass Spectrometry (ICP-MS, Agilent 7900, United States of America)                                                                                                                                                                                                                                                             | 10.1016/j.envres.2022.113032      |
| Inorganic | Sb                              | inorganic ions        | metal ions | 48.7        | ng m <sup>-3</sup>    | Hong Kong based restaurants and two simulated cooking experiments | Teflon-membrane (47 mm), Nuclepore polycarbonate membrane and quartz-fiber filter (47 mm) | The inorganic elements and water soluble ions were analysed by the Energy Dispersive X-ray Fluorescence Analyser (ED-XRF) and ion chromatography system, respectively. The polycyclic aromatic compounds (PACs) in the filters were extracted with organic solvents and determined by gas chromatography-mass spectrometry (GC-MS) | 10.1016/j.envpol.2021.117754      |
| organic   | sebacic acid (C <sub>10</sub> ) | Dicarboxylic acids    |            | 65.7±56.3   | ng m <sup>-3</sup>    | seven different cuisine types                                     | quartz-fiber filters                                                                      | solvent extraction-gas chromatography mass spectrometry (SE-GC/MS) method                                                                                                                                                                                                                                                          | 10.1016/j.chemosphere.2020.127758 |
| organic   | Sinapinaldehyde                 | Ketones and aldehydes |            | 0.112       | ug g <sup>-1</sup>    | poultry cooking and grilling                                      | 47 mm diameter quartz fibre filters                                                       | chromatography-mass spectrometry (GC-MS)                                                                                                                                                                                                                                                                                           | 10.1016/j.scitotenv.2021.146090   |

|           |                 |                                                     |            |                              |          |                                                                   |                                                                                                              |                                                                                                                                                                                                                                                                                                                                    |                                   |
|-----------|-----------------|-----------------------------------------------------|------------|------------------------------|----------|-------------------------------------------------------------------|--------------------------------------------------------------------------------------------------------------|------------------------------------------------------------------------------------------------------------------------------------------------------------------------------------------------------------------------------------------------------------------------------------------------------------------------------------|-----------------------------------|
| Inorganic | Sinapinaldehyde | Ketones and aldehydes                               |            | 279.9                        | ng m-3   | Hong Kong based restaurants and two simulated cooking experiments | Teflon-membrane (47 mm), Nuclepore polycarbonate membrane and quartz-fiber filter (47 mm)                    | The inorganic elements and water soluble ions were analysed by the Energy Dispersive X-ray Fluorescence Analyser (ED-XRF) and ion chromatography system, respectively. The polycyclic aromatic compounds (PACs) in the filters were extracted with organic solvents and determined by gas chromatography-mass spectrometry (GC-MS) | 10.1016/j.envpol.2021.117754      |
| organic   | squalane        | alcanes                                             |            | 10.4±11.2                    | ng m-3   | seven different cuisine types                                     | quartz-fiber filters                                                                                         | solvent extraction-gas chromatography mass spectrometry (SE-GC/MS) method                                                                                                                                                                                                                                                          | 10.1016/j.chemosphere.2020.127758 |
| Inorganic | Sr              | inorganic ions                                      | metal ions | 0.11 ± 0.07                  | [mg g-1] | General cooking activities                                        | 150 mm pure quartz microfibre filters (Fiorini, France)                                                      | Inductively Coupled Plasma-Atomic Emission Spectrometry (ICP-AES, iCAP 6000 series, Thermo Scientific, United Kingdom)                                                                                                                                                                                                             | 10.1016/j.envres.2022.113032      |
| organic   | Stigmasterol    | Alcohols, sterols and other compounds with OH group |            | 0,206                        | ug g-1   | poultry cooking and grilling                                      | 47 mm diameter quartz fibre filters                                                                          | chromatography-mass spectrometry (GC-MS)                                                                                                                                                                                                                                                                                           | 10.1016/j.scitotenv.2021.146090   |
| organic   | stigmasterol    | lipid                                               |            | 279.8±181.1                  | ng m-3   | seven different cuisine types                                     | quartz-fiber filters                                                                                         | solvent extraction-gas chromatography mass spectrometry (SE-GC/MS) method                                                                                                                                                                                                                                                          | 10.1016/j.chemosphere.2020.127758 |
| organic   | styrene         | aromatics                                           | VOCs       | Numerical data not available | NA       | Firepower Sweep Test (FST)                                        | Vacuum canister fitted with a critical orifice (CS1200ES Sampler; ENTECH Instruments, Inc.; Simi Valley, CA) | Gas chromatograph mass spectrometer (GC-17A); Shimadzu; Kyoto, Japan                                                                                                                                                                                                                                                               | 10.1021/acs.est.8b07019           |

|           |                                           |                    |  |                              |                       |                                                                                      |                                                                                           |                                                                                                                                                                                                                                                                                                                                    |                                   |
|-----------|-------------------------------------------|--------------------|--|------------------------------|-----------------------|--------------------------------------------------------------------------------------|-------------------------------------------------------------------------------------------|------------------------------------------------------------------------------------------------------------------------------------------------------------------------------------------------------------------------------------------------------------------------------------------------------------------------------------|-----------------------------------|
| organic   | suberic acid (C <sub>8</sub> )            | Dicarboxylic acids |  | 232.7±219.9                  | ng m-3                | seven different cuisine types                                                        | quartz-fiber filters                                                                      | solvent extraction-gas chromatography mass spectrometry (SE-GC/MS) method                                                                                                                                                                                                                                                          | 10.1016/j.chemosphere.2020.127758 |
| organic   | succinic acid (C <sub>4</sub> )           | Dicarboxylic acids |  | 285.5±212.2                  | ng m-3                | seven different cuisine types                                                        | quartz-fiber filters                                                                      | solvent extraction-gas chromatography mass spectrometry (SE-GC/MS) method                                                                                                                                                                                                                                                          | 10.1016/j.chemosphere.2020.127758 |
| Inorganic | sulphate (SO <sub>4</sub> <sup>2-</sup> ) | inorganic ions     |  | Numerical data not available | NA                    | Firepower Sweep Test (FST)                                                           |                                                                                           | DX-500 Ion Chromatography System; Dionex; Waltham, MA                                                                                                                                                                                                                                                                              | 10.1021/acs.est.8b07019           |
| Inorganic | sulphate (SO <sub>4</sub> <sup>2-</sup> ) | inorganic ions     |  | 1.8 ± 1.0                    | [mg g <sup>-1</sup> ] | sets of duplicate cooking samples were collected, using the most used 5 types of oil |                                                                                           | ion chromatograph method (DX-120, Dionex Ltd., Sunnyvale, CA, USA)                                                                                                                                                                                                                                                                 | 10.1016/j.envpol.2017.04.033      |
| Inorganic | sulphate (SO <sub>4</sub> <sup>2-</sup> ) | inorganic ions     |  | 109 ± 58                     | [mg g <sup>-1</sup> ] | General cooking activities                                                           | 150 mm pure quartz microfibres filters (Fiorini, France)                                  | liquid ion chromatography (Dionex™ ICS-900, Thermo Scientific, United Kingdom)                                                                                                                                                                                                                                                     | 10.1016/j.envres.2022.113032      |
| Inorganic | sulphate (SO <sub>4</sub> <sup>2-</sup> ) | inorganic ions     |  | 10.0                         | ug m-3                | Hong Kong based restaurants and two simulated cooking experiments                    | Teflon-membrane (47 mm), Nuclepore polycarbonate membrane and quartz-fiber filter (47 mm) | The inorganic elements and water soluble ions were analysed by the Energy Dispersive X-ray Fluorescence Analyser (ED-XRF) and ion chromatography system, respectively. The polycyclic aromatic compounds (PACs) in the filters were extracted with organic solvents and determined by gas chromatography-mass spectrometry (GC-MS) | 10.1016/j.envpol.2021.117754      |

|         |                                       |                       |      |                              |          |                               |                                                                                                              |                                                                                                |                                   |
|---------|---------------------------------------|-----------------------|------|------------------------------|----------|-------------------------------|--------------------------------------------------------------------------------------------------------------|------------------------------------------------------------------------------------------------|-----------------------------------|
| organic | t,2-butene                            | alkenes               | VOCs | Numerical data not available | NA       | Firepower Sweep Test (FST)    | Vacuum canister fitted with a critical orifice (CS1200ES Sampler; ENTECH Instruments, Inc.; Simi Valley, CA) | Gas chromatograph mass spectrometer (GC-17A); Shimadzu; Kyoto, Japan                           | 10.1021/acs.est.8b07019           |
| organic | t,2-pentene                           | alkenes               |      | Numerical data not available | NA       | Firepower Sweep Test (FST)    |                                                                                                              |                                                                                                | 10.1021/acs.est.8b07019           |
| organic | terephthalic acid (1,4)               | Dicarboxylic acids    |      | 16.7±13.7                    | ng m-3   | seven different cuisine types | quartz-fiber filters                                                                                         | solvent extraction-gas chromatography mass spectrometry (SE-GC/MS) method                      | 10.1016/j.chemosphere.2020.127758 |
| organic | Tetracosane                           | alkanes               |      | 0.72 ± 0.13                  | [mg g-1] | General cooking activities    | 150 mm pure quartz microfibres filters (Fiorini, France)                                                     | high-resolution gas chromatography coupled to a high-resolution mass spectrometer (HRGC/HRMS). | 10.1016/j.envres.2022.113032      |
| organic | tetracosane (n-C <sub>24</sub> )      | alkanes               |      | 30.6±13.1                    | ng m-3   | seven different cuisine types | quartz-fiber filters                                                                                         | solvent extraction-gas chromatography mass spectrometry (SE-GC/MS) method                      | 10.1016/j.chemosphere.2020.127758 |
| organic | Tetracosanoic acid                    | carboxylic acids      |      | 4.9 ± 4.2                    | [mg g-1] | General cooking activities    | 150 mm pure quartz microfibres filters (Fiorini, France)                                                     | high-resolution gas chromatography coupled to a high-resolution mass spectrometer (HRGC/HRMS). | 10.1016/j.envres.2022.113032      |
| organic | tetracosanoic acid (C <sub>24</sub> ) | carboxylic acids      |      | 5.65 ± 3.87                  | [mg g-1] | General cooking activities    | 150 mm pure quartz microfibres filters (Fiorini, France)                                                     | high-resolution gas chromatography coupled to a high-resolution mass spectrometer (HRGC/HRMS). | 10.1016/j.envres.2022.113032      |
| organic | tetracosanoic acid (C <sub>24</sub> ) | saturated fatty acids |      | 62.5±46.6                    | ng m-3   | seven different cuisine types | quartz-fiber filters                                                                                         | solvent extraction-gas chromatography mass spectrometry (SE-GC/MS) method                      | 10.1016/j.chemosphere.2020.127758 |
| organic | tetradecanoic acid (C <sub>14</sub> ) | carboxylic acids      |      | 8,95                         | ug g-1   | poultry cooking and grilling  | 47 mm diameter quartz fibre filters                                                                          | chromatography–mass spectrometry (GC–MS)                                                       | 10.1016/j.scitotenv.2021.146090   |

|           |                                       |                       |                          |                              |          |                                                                   |                                                                                                              |                                                                                                                                                                                                                                                                                                                                    |                                   |
|-----------|---------------------------------------|-----------------------|--------------------------|------------------------------|----------|-------------------------------------------------------------------|--------------------------------------------------------------------------------------------------------------|------------------------------------------------------------------------------------------------------------------------------------------------------------------------------------------------------------------------------------------------------------------------------------------------------------------------------------|-----------------------------------|
| organic   | tetradecanoic acid (C <sub>14</sub> ) | saturated fatty acids |                          | 770.3±683.6                  | ng m-3   | seven different cuisine types                                     | quartz-fiber filters                                                                                         | solvent extraction-gas chromatography mass spectrometry (SE-GC/MS) method                                                                                                                                                                                                                                                          | 10.1016/j.chemosphere.2020.127758 |
| organic   | tetratriactane (n-C <sub>34</sub> )   | alkanes               |                          | 5.2±4.0                      | ng m-3   | seven different cuisine types                                     | quartz-fiber filters                                                                                         | solvent extraction-gas chromatography mass spectrometry (SE-GC/MS) method                                                                                                                                                                                                                                                          | 10.1016/j.chemosphere.2020.127758 |
| Inorganic | Ti                                    | inorganic ions        | metal ions               | 1.05 ± 0.60                  | [mg g-1] | General cooking activities                                        | 150 mm pure quartz microfibres filters (Fiorini, France)                                                     | Inductively Coupled Plasma-Atomic Emission Spectrometry (ICP-AES, iCAP 6000 series, Thermo Scientific, United Kingdom)                                                                                                                                                                                                             | 10.1016/j.envres.2022.113032      |
| Inorganic | Ti                                    | inorganic ions        | metal ions               | 8.0                          | ng m-3   | Hong Kong based restaurants and two simulated cooking experiments | Teflon-membrane (47 mm), Nuclepore polycarbonate membrane and quartz-fiber filter (47 mm)                    | The inorganic elements and water soluble ions were analysed by the Energy Dispersive X-ray Fluorescence Analyser (ED-XRF) and ion chromatography system, respectively. The polycyclic aromatic compounds (PACs) in the filters were extracted with organic solvents and determined by gas chromatography-mass spectrometry (GC-MS) | 10.1016/j.envpol.2021.117754      |
| organic   | toluene                               | aromatics             | VOCs ultrafine particles | Numerical data not available | NA       | Firepower Sweep Test (FST)                                        | Vacuum canister fitted with a critical orifice (CS1200ES Sampler; ENTECH Instruments, Inc.; Simi Valley, CA) | Gas chromatograph mass spectrometer (GC-17A); Shimadzu; Kyoto, Japan                                                                                                                                                                                                                                                               | 10.1021/acs.est.8b07019           |

|         |                                     |                                                     |  |             |                       |                               |                                                          |                                                                                                |                                   |
|---------|-------------------------------------|-----------------------------------------------------|--|-------------|-----------------------|-------------------------------|----------------------------------------------------------|------------------------------------------------------------------------------------------------|-----------------------------------|
| organic | triacontane (n-C <sub>30</sub> )    | alkanes                                             |  | 0.26 ± 0.09 | [mg g <sup>-1</sup> ] | General cooking activities    | 150 mm pure quartz microfibres filters (Fiorini, France) | high-resolution gas chromatography coupled to a high-resolution mass spectrometer (HRGC/HRMS). | 10.1016/j.envres.2022.113032      |
| organic | triacontane (n-C <sub>30</sub> )    | alkanes                                             |  | 10.3±8.0    | ng m <sup>-3</sup>    | seven different cuisine types | quartz-fiber filters                                     | solvent extraction-gas chromatography mass spectrometry (SE-GC/MS) method                      | 10.1016/j.chemosphere.2020.127758 |
| organic | Triacantanol                        | Alcohols, sterols and other compounds with OH group |  | 0,062       | ug g <sup>-1</sup>    | poultry cooking and grilling  | 47 mm diameter quartz fibre filters                      | chromatography–mass spectrometry (GC–MS)                                                       | 10.1016/j.scitotenv.2021.146090   |
| organic | tricosane (n-C <sub>23</sub> )      | alkanes                                             |  | 0.65 ± 0.40 | [mg g <sup>-1</sup> ] | General cooking activities    | 150 mm pure quartz microfibres filters (Fiorini, France) | high-resolution gas chromatography coupled to a high-resolution mass spectrometer (HRGC/HRMS). | 10.1016/j.envres.2022.113032      |
| organic | tricosane (n-C <sub>23</sub> )      | alkanes                                             |  | 28.5±21.5   | ng m <sup>-3</sup>    | seven different cuisine types | quartz-fiber filters                                     | solvent extraction-gas chromatography mass spectrometry (SE-GC/MS) method                      | 10.1016/j.chemosphere.2020.127758 |
| organic | tricosanoic acid (C <sub>23</sub> ) | saturated fatty acids                               |  | 11.0±5.5    | ng m <sup>-3</sup>    | seven different cuisine types | quartz-fiber filters                                     | solvent extraction-gas chromatography mass spectrometry (SE-GC/MS) method                      | 10.1016/j.chemosphere.2020.127758 |
| organic | Tricosanol                          | Alcohols, sterols and other compounds with OH group |  | 0,387       | ug g <sup>-1</sup>    | poultry cooking and grilling  | 47 mm diameter quartz fibre filters                      | chromatography–mass spectrometry (GC–MS)                                                       | 10.1016/j.scitotenv.2021.146090   |
| organic | tridecanoic acid (C <sub>13</sub> ) | saturated fatty acids                               |  | 26.2±13.7   | ng m <sup>-3</sup>    | seven different cuisine types | quartz-fiber filters                                     | solvent extraction-gas chromatography mass spectrometry (SE-GC/MS) method                      | 10.1016/j.chemosphere.2020.127758 |
| organic | tritriactotane (n-C <sub>33</sub> ) | alkanes                                             |  | 17.4±10.8   | ng m <sup>-3</sup>    | seven different cuisine types | quartz-fiber filters                                     | solvent extraction-gas chromatography mass spectrometry (SE-GC/MS) method                      | 10.1016/j.chemosphere.2020.127758 |

|           |                                    |                       |            |                              |          |                                                                                      |                                                                                                                               |                                                                                                                                                                                                                                                                                                                                    |                                   |
|-----------|------------------------------------|-----------------------|------------|------------------------------|----------|--------------------------------------------------------------------------------------|-------------------------------------------------------------------------------------------------------------------------------|------------------------------------------------------------------------------------------------------------------------------------------------------------------------------------------------------------------------------------------------------------------------------------------------------------------------------------|-----------------------------------|
| organic   | undecanoic acid (C <sub>11</sub> ) | saturated fatty acids |            | 61.9±50.9                    | ng m-3   | seven different cuisine types                                                        | quartz-fiber filters                                                                                                          | solvent extraction-gas chromatography mass spectrometry (SE-GC/MS) method                                                                                                                                                                                                                                                          | 10.1016/j.chemosphere.2020.127758 |
| Inorganic | V                                  | inorganic ions        | metal ions | 0.24 ± 0.17                  | [mg g-1] | General cooking activities                                                           | 150 mm pure quartz microfibre filters (Fiorini, France)                                                                       | ICP-Mass Spectrometry (ICP-MS, Agilent 7900, United States of America)                                                                                                                                                                                                                                                             | 10.1016/j.envres.2022.113032      |
| Inorganic | V                                  | inorganic ions        | metal ions | 10.3                         | ng m-3   | Hong Kong based restaurants and two simulated cooking experiments                    | Teflon-membrane (47 mm), Nuclepore polycarbonate membrane and quartz-fiber filter (47 mm)                                     | The inorganic elements and water soluble ions were analysed by the Energy Dispersive X-ray Fluorescence Analyser (ED-XRF) and ion chromatography system, respectively. The polycyclic aromatic compounds (PACs) in the filters were extracted with organic solvents and determined by gas chromatography-mass spectrometry (GC-MS) | 10.1016/j.envpol.2021.117754      |
| organic   | valeraldehyde                      | saturated aldehydes   |            | Numerical data not available | NA       | Firepower Sweep Test (FST)                                                           |                                                                                                                               | HPLC 1050 series; Agilent Technologies; Santa Clara, CA                                                                                                                                                                                                                                                                            | 10.1021/acs.est.8b07019           |
| Inorganic | Zn                                 | inorganic ions        | metal ions | 0.14 ± 0.06                  | [mg g-1] | sets of duplicate cooking samples were collected, using the most used 5 types of oil | 37 mm polypropylene-fiber filter (Pall-Gelman, Ann Arbor, MI, USA)                                                            | ICP-MS, Agilent 7500a, Agilent Co, Santa Clara, USA                                                                                                                                                                                                                                                                                | 10.1016/j.envpol.2017.04.033      |
| Inorganic | Zn                                 | inorganic ions        | metal ions | 10,296                       | ug m-3   | General cooking activities                                                           | cellulose/PTFE collection filters fitted in the cyclones of size-selective inlets of diameter 2.5 µm connected to the sampler | ICP-OES (8300 Perkin Elmer, USA)                                                                                                                                                                                                                                                                                                   | 10.1007/s42452-020-03800-0        |

|           |                                                         |                                                     |            |             |                       |                                                                   |                                                                                           |                                                                                                                                                                                                                                                                                                                                    |                                   |
|-----------|---------------------------------------------------------|-----------------------------------------------------|------------|-------------|-----------------------|-------------------------------------------------------------------|-------------------------------------------------------------------------------------------|------------------------------------------------------------------------------------------------------------------------------------------------------------------------------------------------------------------------------------------------------------------------------------------------------------------------------------|-----------------------------------|
| Inorganic | Zn                                                      | inorganic ions                                      | metal ions | 1.05 ± 0.57 | [mg g <sup>-1</sup> ] | General cooking activities                                        | 150 mm pure quartz microfibre filters (Fiorini, France)                                   | Inductively Coupled Plasma-Atomic Emission Spectrometry (ICP-AES, iCAP 6000 series, Thermo Scientific, United Kingdom)                                                                                                                                                                                                             | 10.1016/j.envres.2022.113032      |
| Inorganic | Zn                                                      | inorganic ions                                      | metal ions | 132.8       | ng m <sup>-3</sup>    | Hong Kong based restaurants and two simulated cooking experiments | Teflon-membrane (47 mm), Nuclepore polycarbonate membrane and quartz-fiber filter (47 mm) | The inorganic elements and water soluble ions were analysed by the Energy Dispersive X-ray Fluorescence Analyser (ED-XRF) and ion chromatography system, respectively. The polycyclic aromatic compounds (PACs) in the filters were extracted with organic solvents and determined by gas chromatography-mass spectrometry (GC-MS) | 10.1016/j.envpol.2021.117754      |
| organic   | <i>ααα</i> (20 <i>R</i> )-Cholestane (C <sub>27</sub> ) | steranes                                            |            | 87,3        | ug g <sup>-1</sup>    | poultry cooking and grilling                                      | 47 mm diameter quartz fibre filters                                                       | chromatography-mass spectrometry (GC-MS)                                                                                                                                                                                                                                                                                           | 10.1016/j.scitotenv.2021.146090   |
| organic   | <i>ααα</i> (20 <i>S</i> )-Cholestane (C <sub>27</sub> ) | steranes                                            |            | 65,4        | ug g <sup>-1</sup>    | poultry cooking and grilling                                      | 47 mm diameter quartz fibre filters                                                       | chromatography-mass spectrometry (GC-MS)                                                                                                                                                                                                                                                                                           | 10.1016/j.scitotenv.2021.146090   |
| organic   | <i>αββ</i> (20 <i>R</i> )-Cholestane (C <sub>27</sub> ) | steranes                                            |            | 75          | ug g <sup>-1</sup>    | poultry cooking and grilling                                      | 47 mm diameter quartz fibre filters                                                       | chromatography-mass spectrometry (GC-MS)                                                                                                                                                                                                                                                                                           | 10.1016/j.scitotenv.2021.146090   |
| organic   | <i>αββ</i> (20 <i>S</i> )-Cholestane (C <sub>27</sub> ) | steranes                                            |            | 68,9        | ug g <sup>-1</sup>    | poultry cooking and grilling                                      | 47 mm diameter quartz fibre filters                                                       | chromatography-mass spectrometry (GC-MS)                                                                                                                                                                                                                                                                                           | 10.1016/j.scitotenv.2021.146090   |
| organic   | β-Sitosterol                                            | Alcohols, sterols and other compounds with OH group |            | 0,367       | ug g <sup>-1</sup>    | poultry cooking and grilling                                      | 47 mm diameter quartz fibre filters                                                       | chromatography-mass spectrometry (GC-MS)                                                                                                                                                                                                                                                                                           | 10.1016/j.scitotenv.2021.146090   |
| organic   | β-sitosterol                                            | lipid                                               |            | 803.2±398.1 | ng m <sup>-3</sup>    | seven different cuisine types                                     | quartz-fiber filters                                                                      | solvent extraction-gas chromatography mass spectrometry (SE-GC/MS) method                                                                                                                                                                                                                                                          | 10.1016/j.chemosphere.2020.127758 |
