# Supplementary material for: Cooking Particulate Matter: A Systematic Review on Nanoparticle Exposure in the Indoor Cooking Environment
Source: MDPI journal article supplement (doi:10.3390/atmos14010012), 2022-12-21
Supplement: s1 [file s1 › Supplementary table.xlsx]

## Sheet: Foglio1
Author	DOI	Location	Urban or rural	Domestic/restaurant	Season	Heating/Cooking/Intervention type	Kitchen type	Stove type	Fuel type	Food type	Additional food ingredients	Ventilation type	Sample number	Valid measurements	Sampling time [h]	Sampling type	Sample analysis method	PM size [µm]	Concentration range (µg/m3)	Mean/ median (µg/m3)	Standard deviation (µg/m3)	Summary Statistic	Background mean/ median (µg/m3)	Chemical composition	Quality
Maninder Kaur Sidhu et al.	10.1016/j.scitotenv.2017.01.051	(INDIA) District Fatehgarh Sahib located in South-Eastern part of Punjab state and lies between 30°25′ 00″ to 30°45′ 45″ N & 76°04′ 30″ to 76°35′ 00″ E	Rural	Domestic	ND	ND	Indoor kitchen with/out partition; Outdoor enclosed kitchen; Outdoor open-air kitchen; Outdoor semi-open air kitchen	ND	agricultural residue; firewood; biogas; Liquefied Petroleum Gas	ND	ND	ND	60	54	24	aerosol monitor, DUSTTRAK Aerosol Monitor™ (Model 8520, TSI, California, USA) for PM2.5 monitoring and TSI QTRAKTM Indoor air quality (IAQ) monitor (Model 7565, TSI, California, USA) to determine %RH, T and CO concentrations simultaneously for 24 h at time interval of 10 s	NA	2.5	52.2-25949	1328.28	1453.85	Highest PM2.5 concentration were found in household performing cooking in indoor kitchens ( PM2.5: 696.5 μg/m3) followed by outdoor kitchens (PM2.5: 539.5 μg/m3). The concentration of PM2.5 varied according to the fuel type and highest concentration was observed in kitchens using cowdung cakes followed by agricultural residue > firewood > biogas > Liquefied Petroleum Gas (LPG)	457.2	ND	medium
Yaparla Deepthi et al.	10.1016/j.scitotenv.2018.08.381	Kishannagar village in Mahbubnagar district of southern Telangana, India (17.3850° N, 78.4867° E)	rural	domestic	winter and summer and monsoon	ND	Indoor kitchen with partition; Indoor kitchen without partition; Separate enclosed kitchen outside the house and Open kitchen (means open-air cooking)	ND	biomass and LPG	ND	ND	ND	60	60	24	Air sampleswere captured using a 16-channel optical particle counter (Model 1.108, Grimm Labortechnik Ltd., Ainring, Germany) that measures both number and mass distribution of particles ranging from300 nm to 20 μm using light scattering technology (single particle count)where in a semiconductor laser serves as the light source.	NA	1; 2.5; 10		Biomass; Biomass&LPG; LPG respectively: (PM10) 179.51 ± 21; 101.99 ± 21; 77.48 ± 9; (PM2.5) 102.95 ± 18; 45.77 ± 13; 26.51 ± 5; (PM1) 67.66 ± 12; 32.15 ± 9; 14.47 ± 5	as on the left column	the biomass households exhibited high levels of dosage (1181.4 to 5891.7 μg) against the LPG households (89.9 to 811.2 μg), the indoor kitchen types exhibited a maximum intensification of 10.6 times than outdoor kitchens with the same fuel.	ND	NA	medium
Guofeng Shen et al.	10.1021/acs.est.6b05928	laboratory	NA	NA	NA		NA	open burner stove; evaporative burner stove; wick stove; natural draft stove; forced draft stove; three stone fire; low moisture wood; high moisture wood	LPG; alcohol; kerosene; pellet; wood; charcoal; rice hulls	The water boiling test (WBT) protocol (Version 4.2.2),	NA	NA	ND	ND	from seconds to minutes	Cookstove emissions were collected with a stainless steel hood connected to a dilution tunnel, from which gaseous and PM pollutants were sampled. Emissions were quantified using the total-capture constant-flow method, A second stage of dilution (∼1:10) provided by a dilution sampling system (DSS). UFPs were measured from the DSS using a scanning mobility particle sizer (SMPS) model 3936 consistin…	Particle morphology was studied using transmission electron microscopy to produce bright field images using a JEOL EM-2010F instrument with a field emission electron source.	0.010-1	(1.0 ± 1.4) × 10^11-(5.6 ± 0.3) × 10^15	NA	NA	The combustion of LPG and alcohol (∼1011 particles per useful energy delivered, particles/MJd), and kerosene (∼1013 particles/MJd), produced emissions that were lower by 2−3 orders of magnitude than solid fuels (1014−1015 particles/MJd).	NA	NA	High
Karimatu L. Abdullahi et al.	10.1016/j.atmosenv.2013.01.061
M. A. Torkmahalleh et al.	10.1111/j.1600-0668.2012.00783.x	laboratory	NA	NA	NA	Frying	Heating plate	NA	ND	NA	NA	ND	ND	ND	within minutes	A TSI (St. Paul, MN, USA) DustTrak with PM2.5 inlet and a Kanomax (Osaka, Japan) Piezobalance Model 3511 were used to estimate the mass concentration of particles emitted during the experiments. Particle number and size distributions ranging from 10 to 500 nm were monitored with a MSP (Shoreview, MN, USA) wide range particle spectrometer (WPS), which has a scan time of 2 min. A TSI Model 3007 con…	NA	0.010-0.5	ND	ND	NA	soybean, safflower, canola, and peanut oils produced lower PM2.5 emission fluxes (6.1 · 10^5, 3.0 · 10^5, 5.4 · 10^5, and 3.9 · 10^5 ug/min/m2, respectively) than corn, coconut, and olive oils (2.7 · 10^6, 2.9 · 10^6, and 5.7 · 10^6 ug/min/m2, respectively)	NA	NA	High
Congrong He et al.	10.1016/j.atmosenv.2004.03.027	Brisbane, Australia	Urban	Domestic	ND	ND	ND	ND	ND	ND	ND	normal and minimum ventilation conditions	15	15	48	Particle size and number concentration measurements were conducted usingthree different instruments: (1) the TSI Model 3320 aerodynamic particle sizer (APS) (TSI Incorporated, St. Paul, MN, USA), which measures particle size distribution and number concentration in real time, in the range from 0.5 to 20 mm and up to the order of 102 or 103 particle cm_x0001_3 for coincidence errors of 1% and 5%, …	NA	two size ranges: from 0.007 to 0.808 mm (called submicrometer particles for the purpose of this study) and from 0.5 to 20 mm (called supermicrometer particles).	13-735	frying(median peak value: 745), grilling (718 )	Frying (352); grilling (3427)	Indoor approximation of PM2.5 concentrations showed an increase over the background by 3, 30 and 90 times during smoking, grilling and frying, respectively.	increase over the background by 89, 32 and 3 times during grilling, frying and smoking, respectively	NA	High
Shuangde Li et al.	10.1016/j.jes.2016.06.030	laboratory	NA	NA	NA	heating to 265°C	ND	ND	Electric	Four commercial cooking oils	NA	without	ND	ND	within minutes	electrical low pressure impactor (ELPI) without ventilation	NA	0.03-10	PM1.0/PM2.5 and PM2.5/PM10 at peak emission time are around 510–660 and 230–290	PM 1.0; PM 2.5; PM 10: Rapeseed oil (4090; 6190; 21230); Sunflower (3120; 6130; 2520); Corn (2530; 4650; 18330); Soybean (3350; 5870; 25590)	ND	The average PM2.5 mass concentration at the higher fume emission time between 400 and 460 sec is 4.65–6.19 μg/m3, ranked rapeseed > sunflower > soybean > corn oil. The order of maximum number concentration of PM2.5 is soybean (7.8 × 105) > corn (7.5 × 105) > rapeseed (6.8 × 105) > sunflower (5.7 × 105). The mass concentration of PM0.030–0.109 and PM0.109–0.655 accounts for 6.88%–10.85% and 31.66%…	ND	NA	Low
Sait C. Sofuoglu et al.	10.1007/s11356-015-4762-6	university canteen	Urban	Restaurant	Autumn/Winter	Deep frying	ND	ND	ND	Frozen French cut potatoes, chicken nuggets and schnitzels, beef and chicken patties were fried in a deep-fryer filled with 3 L of the deep-frying margarine	ND	naturally ventilated, there was not an exhaust hood in the kitchen	ND	ND	1100 to 1200 h was "before frying", which was sampled and monitored to determine the background concentration levels. Then, 1230 to 1330 h was "during frying" period, followed by "after frying" period of 1400 to 1500 h	gravimetric for PM 2.5; The 3M Quest EVM-7 was used as the monitoring device in this study to simultaneously measure TVOC, PM10, CO, CO2, temperature, and relative humidity (RH).	NA	2.5; 10	76-249	PM2.5: average (±SD) and a median value of 108 (±44) and 90 μg/m3, respectively	as on the left column	PM2.5 concentration of the 4-h period that integrated the three sampling periods of before, during, and after frying were determined to range from 81 to 249 μg/m3 with the mean and median values of 147 and 110 μg/m3, respectively. The average PM10 concentrations of the before-, during-, and after frying periods were 613, 4037, and 635 μg/m3, respectively.	498 (PM10)	NA	High
Rikke Bramming Jørgensen et al.	10.1080/15459624.2012.755864	laboratory	NA	NA	ND	Frying. The temperature in the pan was 200◦C when the experiment started, increasing to 270–320◦C during the frying period.	NA	electric and gas stoves	gas	Bacon	ND	The canopy hood was wall-mounted centrally. The stove in use was installed under the hood, 65 cm away. During frying, the hood extracted 335 m3 air/hr. Basic ventilation in the kitchen room was 119 m3/hr of air supply, and 112 m3/hr outlet (without kitchen hood ventilation).	ND	ND	The standard frying procedure (15 min) was repeated five times during each day of frying. The repetitions were separated by a 25-min break with the ventilation on. There was also a 25-min break after the last repetition.	Gravimetric analysis for particulate matter; TSI-3939 scanning mobility particle sizer system was used to measure the ultrafine particles	NA	ND	level of total particles was between 2200 and 4200	ND	ND	The level of total particles was between 2.2 and 4.2 mg/m3. Frying on a gas stove caused a statistically significant higher amount of ultrafine particles compared with frying on an electric stove.	ND	NA	medium
Lance A. Wallace et al.	10.1021/acs.est.6b03248	laboratory	NA	NA	NA	heating to 300°C	NA	electric	NA	no food	NA	ND	ND	ND	within minutes (4-6)	Aerosol Instrument Manager (AIM) proprietary software (TSI; AIM 10.0; later 10.2) was used to determine size-resolved number concentrations. Number concentrations were corrected for diffusion losses using Multi Instrument Manager (v2.0; later 2.1) proprietary software (TSI).	NA	0.002-0.10	ND	ND	ND	ND	ND	NA	High
Hongmei Xu et al.	10.1016/j.chemosphere.2020.127758	Beilin District (within second-ring road area) of Xi’an	Urban	Restaurant	Between March 11 and March 16, 2019	barbecuing, Grilling and deep frying	All kitchens were separated from the dining areas, while the kitchen doors were kept open all the time	gas stove	natural gas, except electricity was used for the two Western fast food restaurants	traditional Chinese (three served with the Shaanxi, Szechwan, and Cantonese cuisines, respectively), Modern Chinese (Chinese barbecue and Chinese fast food), and exotic cuisines (Western fast food and Japanese)	ND	umbrella-shaped hoods and electrostatic fume purifiers (EFP) to remove oil fumes before exhausted to ambient.	14	14	PM2.5 samples were collected in two dining peak periods, including 11:30e14:30 LST (lunch) and 18:00e21:00 LST (dinner); The background samples (field blank filters) were taken in the break time (15:00e18:00 LST; non-dining period) when all cooking activities were terminated for each kitchen using the same sampler	Mini-Vol air sampler (Airmetrics, Springfield, OR, USA) was placed ~0.5 m beside the cooking appliance in the kitchen. Gravimetric analysis: PM2.5 mass concentrations were obtained by weighing the filters before and after the sampling. Prior to the weighing, all filters were equilibrated in a chamber at a temperature of 20e23 _x0004_C and relative humidity (RH) of 30%e35% for at least 24 h.	Organic compounds, including alkanes (n-alkanes and branched alkanes), polycyclic aromatic hydrocarbons (PAHs), organic acids (i.e., mono- and dicarboxylic acids), alkanols, and sugars were analyzed on the quartz-fiber filters with solvent extraction-gas chromatography mass spectrometry (SE-GC/MS) method	2.5	41.5-280	139	79.2	The mean concentration of total quantified organic compounds (SPM_O) ranged from 1112 to 32,016 ng m-3, with the maximum for the Chinese barbecue restaurants	ND	alcanols; alcanes; manocarboxylic acids; dicarboxylic acids; PAHs; others	High
Wenting Dai et al.	10.1016/j.scitotenv.2018.03.124	Great Wild Goose Pagoda at Qujiang District in southeastern Xi'an	Urban	Restaurant	winter	Boil; Stir-fry; bake; grill; Pan-fry;	ground-floor restaurants; The kitchen door was kept closure all the times, and most dishes were transferred through a pick-up window (b0.5 m2) on thewall of kitchen		electricity; alcohol; natural gas;	Various; red peppers; Pork; vegetable; noodles; marinated meat in baked bun; Meats (pork, beef, mutton, chicken), fish, vegetable; Tofu; Bread; Fish; Potato; chicken; Beef	Curry	Electrostatic precipitator; Hydrovent;	8	8	Gaseous and PM samples were collected in two dining periods (12:00–14:00 and 18:30–20:30 LST for lunch and supper hours, respectively) synchronously. Baseline samples (non-dining period) were taken during break period (15:00–17:00 LST) while no diner was present and cooking activities were terminated	Airborne carbonyls were collected into silica cartridges impregnated with acidified 2,4-dinitrophenylhydrazine (DNPH) (Sep-PakDNPH-silica, 5 μmparticle size, 125 Å pore size;Waters Corporation, Milford, MA). PM2.5 samples were collected on pre-fired (780°C,3h)47mmquartz-fiber filters (QM/A,Whatman, Clifton, NJ, USA) with mini-volume air samplers (Airmetrics, Eugene, OR, USA)	Agilent Technology high-pressure liquid chromatography (HPLC) coupled with a photodiode array detector (DAD) (Series 1200; Santa Clara, CA, USA). The analytes separation was conducted with a PerkinElmer Spheri-5 ODS 5 μm C-18 reversed-phase column (4.6 × 250mm; Norwalk, CT, USA). The wavelengths of 360, 390 and 420 nm were applied for identifying aliphatic, aromatic, and di carbonyls, respectivel…	2.5	ND	ND	ND	The highest total quantified carbonyls (Σcarbonyls) concentration of 313.6 μgm−3 was found in the Chinese Barbecue, followed by the Szechwan Hotpot (222.6 μgm−3) and Indian (221.9 μgm−3) restaurants. However, the highest Σcarbonyls per capitawas found at the Indian restaurant (4500 μg capita−1), suggesting that cooking methods such as stir-fly and bake for spices ingredients released more carbony…	ND	VOCs; PAHs; metals;	High
Bing Per et al.	10.1007/s11783-016-0829-y	Shanghai; China	Urban	Restaurant	ND	stir-frying, simmering, steaming, roasting, stewing and boiling; deep-frying, stewing, grilling, and roasting;	ND	ND		soybean oil, peanut oil and corn oil; vegetable oil, butter, and corn oil;	ND	ND	3	3		PM2.5 samples were collected simultaneously on two 47 mm Teflon-membrane filters (Whatman Inc., UK) and two 47 mm quartz-fiber filters (Whatman Inc., UK) using a four-channel sampler. The Teflon-membrane filters were used for the determination of PM2.5 mass concentration and the analysis of watersoluble ions and elements.	GC/MS ((Agilent 5975 MSD interfaced to a Agilent 6890 GC) analysis).for volatile organic compounds; Water-soluble ions F–, Cl–, NO2 –, NO3 –, SO42–, PO4 3–, NH4 +, Na+, K+, Mg2+, and Ca2+, were measured by ion chromatography (IC; Model 2001, Dionex, USA	2.5	325–693	ND	ND	The PM2.5 concentrations in the cooking emissions were 0.325–0.693 mg$m–3, which were about one order of magnitude higher than the corresponding ambient values. Five kinds of identified components—particulate organic matter, elemental carbon, water-soluble ions, crustal elements and other elements— accounted for 88%, 83.5%, and 87.4% of the total PM2.5 mass	48-69	VOCs	High
Yuejing Zhaoa et al.	10.1016/j.buildenv.2018.12.060	Beijing; China	urban	Domestic	March 4, 2018, to April 2, 2018	Stir-frying; deep-frying; steaming; boiling	ND	gas stove	natural gas	designed an orthogonal test based on a survey of cooking behavior that took into consideration the typical Chinese cooking styles where gas stoves are used. Five key factors were examined (cooking method, the weight of ingredients, the type of meat, the ratio of meat to vegetables, and the type of oil)	ND	forcedly ventilated to ensure that the PM2.5 concentration returned to the background level between each experiment	10	10	ND	laser photometer equipped with a 2.5 μm impactor (AM510; TSI Inc., Shoreview, MN, USA). One of the pumps was loaded with a 37mm Teflon filter (Tisch Environmental Inc., Cleves, OH, USA) to analyze the elements, while the other with a 37mm quartz-fiber filter (Munktell Filter AB, Falun, Dalarna, Sweden) was used to analyze PAHs, OC, and EC.	for the analysis of PAHs using gas chromatography coupled with mass spectrometry (GC/MS, GCMSQP2010 Plus, Shimadzu Corp., Kyoto, Japan)to analyze Al, P, V, Cr, Mn, Fe, Ti, Co, Ni, Cu, Zn, As, Br, Cd, Sb, and Pb using inductively coupled plasma-mass spectrometry (ICP-MS, ELAN DRC II, PerkinElmer Inc., Waltham, MA, USA) and K, Na, Ca, Mg, and S using inductively coupled plasma atomic emission spect…	2.5	stir-frying, panfrying, deep-frying, steaming, and boiling were 680–990, 290–480, 140–240, 40, 80, respectively	ND	ND	The results indicated that OC was the dominant component of the fine emitted particles and the emission rates ranged from 27.87 μg/min to 1916.68 μg/min. In comparison, the emission rates of EC ranged from 2.02 μg/min to 29.47 μg/min. The emission rates of the elements varied between 0.01 ng/min and 9.57 μg/min and S, Ca, Na, K, Al, Mg, and Fe were the most abundant elements in cooking profiles. …	ND	PAHs, metals	medium
Xingyun Liu et al.	10.3390/foods11060833	laboratory; Hefei University of Technology, Hefei 230009, China	Urban	NA	ND	grilling	simulatory	ND	high-density bamboo charcoal (HDBC)	meat	pepper, salt, garlic powder, and compound marinade,	40-inch by 50-inch stainless steel hood and ducted to the stack of the facility with an exhaust fan. The exhaust fan had a variable speed drive and controller, which was used to adjust the velocity and flow rates through the stack.	ND	ND	ND	DustTrak DRX aerosol monitor in real-time	VOCs and carbonyl compounds in the cooking fumes were analyzed by TDGC/MS and HPLC, respectively	1.0; 2.0; 4.0; 10.0	Total particulate matter 40470 +/- 5160 (control group), 21100 +/- 3520 (salt), 14130 +/- 40900 (white pepper), 27170 +/- 2970 (garlic powder), and 17800 +/- 950 (MS)	Control: 36200 +/- 5.28 (PM1); 37060 +/- 5450 (PM2.5); 37730 +/- 5540 (PM4.0); 39030 +/- 5950 (PM10); Salt: 18330 +/- 3180; 18630 +/- 3200; 19000 +/- 4120; 20060 +/- 2930; white pepper: 12500 +/- 4480; 12780 +/- 4130; 12960 +/- 5160; 13730 +/- 4140; garlic powder: 23130 +/- 2650; 23500 +/- 2300; 24030 +/- 3020; 25870 +/- 3320	as on the left column	the application of white pepper, salt, garlic powder, and mixed spices could significantly reduce the total particles mass concentration (TPM) emissions during meat-grilling by 65.07%, 47.86%, 32.87%, and 56.01%, respectively. The mass concentration of PM during meat-grilling reached maximum values ranging from 350 to 390 s and gradually fell at the final stages of grilling.	ND	aldehyde, ketone, carbonyl compounds, VOCs,	high
Simge Taner et al.	10.1016/j.scitotenv.2013.03.018	Kocaeli, Turkey	urban	Restaurant	May of 2011	ND	ND	ND	Charcoal; Electricity, natural gas, and wood	ND	ND	ND	14		ND	Leland Legacy pump (SKC Inc., Eighty Four, PA, USA) combined with a five-stage Sioutas cascade impactor (SKC Inc., Eighty Four, PA, USA)	ICP-MS	0.25; 0.5; 1.0; 2.5	ND	ND	ND	the major trace elements identified in the PM2.5 included V, Se, Zn, Cr, As, Cu, Ni, and Pb. Four factors that explained over 77% of the total variance were identified by the PCA. These factors included charcoal combustion, indoor activities, crustal components, and road dust. The Se, As, Cd, and V contents in the PM2.5 were highly enriched	ND	metals	medium
M. Amouei Torkmahalleh et al.	10.1016/j.atmosenv.2013.03.038	laboratory Potsdam USA	Urban	NA	ND	heating canola or soybean oil without stirring	ND	ND	ND	NA	salt, sea salt, black pepper, garlic powder, and turmeric	ND	ND	ND	ND	A TSI (St. Paul, MN) DustTrak Model 8520 Aerosol Monitor with a PM2.5 inlet was utilized with 1 min integrating times to determine the mass concentration of particles emitted during the experiments. Particle number and size distributions ranging from 10 nm to 500 nm were monitored with an MSP (Shoreview, MN) Wide-range Particle Spectrometer_x0003_ (WPS) using a scan time of 2 min.	NA	0.010; 0.5; 2.5	≤4000 (variable with oil type, temperature and additives)	ND	ND	Black pepper, table salt, and sea salt reduced the PM2.5 emission of canola oil by 86% (p < 0.001), 88% (p < 0.001), and 91% (p < 0.001), respectively. Black pepper, table salt, and sea salt also decreased the total particle number emissions of canola oil by 45% (p ¼ 0.003), 52% (p ¼ 0.001), and 53% (p < 0.001), respectively. Turmeric and garlic powder showed no changes in the PM2.5 and total num…	ND	NA	Low
J. Baumgartner et al.	10.1111/j.1600-0668.2011.00730.x	west of Lijiang city in Yunnan, China, at roughly 2700 m elevation in the Hengduan Mountains (N 26_x0003_52¢, E100_x0003_06¢)	Rural	domestic	winter (December 2008–February 2009) and summer (April–August 2009)	ND	Some kitchens are enclosed, while others have windows or 20–50 cm gaps between the wall and ceiling	stoves consist of an enclosed combustion chamber with a small sliding metal door for adding fuelwood	biomass	ND	ND	chimney that vents smoke outside the kitchen	335	335	24	portable, battery-operated pump (Apex Pro, Casella CEL, Kempston, Bedford, UK) attached downstream from a Slaton cassette (BGI Inc., Waltham, MA, USA), 37-mm Teflon filter (SKC Inc., Eighty Four, PA, USA, 2.0-lm pore size), and GK2.05 cyclone (BGI Inc.) with a 2.5-lm aerodynamic diameter cut point when operated at 4 l/min ± 10%.	gravimetric	2.5	Average personal 24-h PM2.5 exposure among participants ranged from 9 to 492 ug/m3 in summer and 22 to 634 ug/m3 in winter	The average (i.e., geometric mean) 24-h PM2.5 exposure among adult women was 55 ug/m3 (95% CI: 49, 62) in summer and twice as high, namely 117 ug/m3; Among children, the average 24-h PM2.5 exposure decreased with age with young children (5–8 years old) having significantly higher exposure than children 9–11 years old [70 ug/m3 (95% CI: 60, 80) vs. 46 ug/m3 (95% CI: 40, 49); P < 0.001] and childre…	ND	The geometric mean winter PM2.5 exposure among adult women was twice that of summer exposure [117 lg/m3 (95% CI: 107, 128) vs. 55 lg/m3 (95% CI: 49, 62)].	women who reported never cooking had an average exposure level that was 27% lower than cooks [120 lg/m3 (95% CI: 109, 132) vs. 87 lg/m3 (95% CI: 64, 110);	NA	Medium
James Jetter et al.	10.1021/es301693f	laboratory ND	ND	NA	ND	boiling water test	NA	twenty-two cookstove types	charcoal, pellets, corn cobs, rice hulls, and plant oil	NA	NA	Two cookstoves were equipped with chimneys (∼2 m height). Natural-draft (also termed natural convection) stoves dominated the cookstove matrix; four forced-draft (fan-provided air) stoves were also tested. Twelve stoves with batch fuel loading (e.g., charcoal stoves) required less time for tending than others that required manual fuel feeding. Four stoves were variations of the “rocket” stove des…	44	44	ND	Water Boiling Test (WBT) protocol	Fine particle mass was measured gravimetrically for each WBT phase	2.5	NA	NA	NA	The lowest PM2.5 emissions were 74 mg MJdelivered −1 from a technologically advanced cookstove compared with 700−1400 mg MJdelivered −1 from the base-case open 3-stone cookfire. The highest thermal efficiency was 53% compared with 14−15% for the 3-stone cookfire	NA	NA	high
T. Wangchuk et al.	10.1111/ina.12291	Bhutan	rural	Domestic	January 2013 (winter) - April 2013 (spring)	heating (metal chimney stove), rice cooking (traditional mud stove), fodder preparation (stone tripod stove), and liquor distillation (traditional mud stove). All the cooking activities involved boiling and steaming, and no frying or grilling was involved.	mainly separately structured kitchen outside the main house	traditional stoves, built mostly from mud; stone tripod stove, the simplest open fire stove, where firewood can be fed from more than one direction	biomass, LPG (1) and electricity (1)	ND	ND	ND	4	4	The duration of activities was 5 h for heating in H1 (from 17:00 to 22:00, until occupants went to bed), 34 min for cooking in H2 (cooking rice for a family of 5), 50 min for fodder preparation in H3, and 2 h for liquor distillation in H4.	PM2.5 was measured using a Dust-Trak aerosol photometer (TSI Model 8520, TSI Inc., St. Paul, MN, USA), that operates based on a lightscattering technique. PN was measured using a NanoTracer (NT, Philips Aerasense, Netherlands), which works by diffusion charging and measures PN concentrations up to 1 x 10^6 particles/cm3 in the size range of 10–300 nm	NA	2.5	1.5x10^3-2x10^5	1x10^3	1x10^3	When stoves were operated, the pollutant concentrations were significantly elevated above background levels, by an average of 40 and 18 times for PM2.5 and CO, respectively. Emission rates (mg/min) ranged from 1.07 x 10^2 (PM2.5) for the stone tripod stove during fodder preparation to 6.20 x 10^2 (PM2.5)	1.5x10^2	NA	HIGH
Sophia R. Zhai et al.	10.1016/j.scs.2019.101845	laboratory	NA	NA	NA	oils heated in a non-stick aluminum pan until visible smoke was produced	typical open kitchen environment	common electrical stove	electric	cooking oils: vegetable, canola, corn, olive, peanut, and coconut oils	ND	with (wall-mounted exhaust hood/fan) and without a smoke exhaust hood	ND	ND	0.008 (30sec)	Fluke 983 Particle Counter	NA	2.0; 10.0;	NA	NA	NA	coconut and olive oil produced the most particles at low temperatures; peanut and canola oil produced the most particles at high temperatures; the smaller the particle size, the more produced, and the quicker they appeared. Particles of sizes up to 0.3 μm in diameter were of the largest quantity and were the first to appear in abundance; subsequently, particles in the interval of 0.3 μm to 0.5 μm…	Na	NA	High
Sukanta Nayek et al.	10.1007/s11356-018-1831-7	West Bengal, India	Rural	Domestic	summer; monsoon; winter		kitchen space having at least the roof on the head, kitchen without any artificial ventilation or chimney setup, and cooking is done on the traditional earthen cook stoves	ND	mixed biomass fuels (dung, crop residues, husk, fire wood) predominated with cow dung cake	ND	ND	any artificial ventilation or chimney	180		ND	MiniVol TAS (Tactical Air Sampler) instrument (Air Metrics, Eugene, OR, USA) which is a portable air sampler for size selective particulate matter (PM2.5) sampling	NA	2.5		974	ND	Most variable exposures to the fine particulate matters in all three seasons (summer: avg. temp. 32 °C, avg. humidity 70%; monsoon: avg. temp. 30 °C, avg. humidity 81%; winter: avg. temp. 19 °C, avg. humidity 63%) were noticed in the rural kitchens with openness in the range of 25–50%. Maximum fine particulate pollution exposures were found in least opened kitchens (< 25% openness) in the range o…	ND	NA	high
Yamamoto et al.	10.1007/s11356-013-2062-6	Nouna, Burkina Faso		Domestic	during the wet seasons (May to November) of 2006 and 2007			three-stone and charcoal stoves	wood and charcoal				148	148	24	Passive personal DataRAM 1000AN (pDR) monitors were used to determine PM10 concentrations	NA	0.1-10	29-2656	2537		Mean outdoor kitchen PM10 levels were relatively high (774 μg/m3, 95%CI 329–1,218 μg/m3), but lower than indoor concentrations (Satterthwaite t value, −6.14; p <0.0001). In multivariable analyses, outdoor kitchens were negatively associated with PM10 (OR=0.06, 95 % CI 0.02–0.16, p value <0.0001) concentrations. Strong area PM10 correlations were found with indoor kitchens (Spearman’s r =0.82, p <…	774
James D. Johnston et al.	10.3390/ijerph17165681	Bhaktapur, Nepal	urban	Domestic	from 30 April to 3 May 2019	ND	ND	ND	LPG, wood	ND	ND	ND	19	19	24	RTI International’s MicroPEMs V 3.2A (RTI International, Research Triangle Park, NC, USA). The MicroPEMs allow for both gravimetric (filter-based) sampling and real-time datalogging using an on-board nephelometer.	Gravimetric	2.5	19.37-1384.44	118.46	389.54	fuel type and location (p = 0.008) remained significantly associated with mean PM2.5 concentration, but number of smokers in the home did not (p = 0.87).The line graph of mean (over fuel type and location categories) PM2.5 concentration over time showed increases in mean PM2.5 concentrations primarily at mealtimes, particularly in homes that burned wood indoors	ND	NA	high
Antti Karjalainen et al	10.1080/15459624.2017.1403611	Finland		Restaurant	October 2014 and March 2016, both on three consecutive days during a week	baking	bakery	oven	All the ovens were fueled by oil	breads, rolls, bagels, baguettes, rice pasties, pies, cakes, gateaux, buns, doughnuts, pastries, and biscuits	ND	mechanical ventilation (F7 filters) in the building. F7 is a filter for fine dust (according to the European standard for air filters EN779:2012) with an average efficiency (Em, %) for 0.4-μm particles of 80 Em < 90	10	10	8	Real-time Cm was measured with a tapered element oscillating microbalance (TEOM; Thermo Scientific, USA) and a DustTrak DRX (TSI, USA). A customized precyclone with a cut point of approximately 0.5 μm was attached to the TEOM when real-time Cm of nanoparticles was measured. The DustTrak DRX is a lightscattering laser photometer thatmeasures simultaneously PM1 (Dae < 1 μm; Dae is an aerodynamic di…	gravimetric; Electron microscopy (EM) samples were collected on porous carbon films (S147-4400 Holey Carbon Film 400 Mesh Cu, Agar Scientific, USA) with an aspiration sampler[15] at the BZ of the dough maker and at the S-A. In the measurement campaign 2, a pre-impactor of the SMPS was attached to the aspiration sampler to cut off large particles. Concentrations of organic and elemental carbon wer…	1.0; 2.5; 10.0; 15.0;	6800-14500	ND	ND	Number concentration of fine and nanoparticles, and mass concentrations of both the inhalable dust and nanoparticles were high. The nanoparticle fraction was 9–15% of the inhalable dust at the breathing zone of the dough maker. Different sources, such as ovens and doughnut baking affected the number size distribution. Flour dust contained nanoparticles but most of the fine and nanoparticles were …	ND	Metals
Hyunwook Cho et al.	10.1016/j.jenvman.2018.12.010	laboratory; Inha University	Urban	NA	ND	pan-frying	NA	electronic induction heater	electronic	salmon; Loin cut to 150 g to fit the pan-frying process was used. The frying was carried out by placing 30 ml of olive oil and a piece of salmon in a pan and heating for 450 s, after which the was salmon burnt to a crisp form.	ND	An exhaust fan and duct were installed at the top of the hood through which particulate and gaseous matter could be emitted. To reduce the impact of the external influence, all doors and windows of the laboratory were closed. After each experiment, all of the doors and windows were opened for ventilation for 30 min until the particle concentration decreased to the initial background concentration.				An electrical low pressure impactor (ELPI+; DEKATI, Finland) was used to measure the number concentration of particles with diameters from 6 nm to 10 μm	morphology of the PM visually through high resolution transmission electron microscopy (HRTEM; JEM-2100, JEOL, Japan) at 200 kV	0.006-10.0	ND	ND	ND	The newly defined emission rates vary significantly with time and are very different from the conventionally determined rates that do not consider the variation of particle concentration with time. The emission rate of UFPs decreased over time after a sharp rise, whereas that of AMPs continued to increase, resulting in a change in the proportions of UFPs and AMPs in the total PM from 93 to 7% to …	ND	NA	medium
Shuangde Li et al.	10.1016/j.jes.2016.06.030	laboratory	NA	NA	ND	heating	The size of the kitchen is 4.5 m (L) × 4.0 m (W) × 3.0 m (H)	gas stove	LPG	Three hundredmilliliter different oil (rapeseed, sunflower, soybean and corn oil) in a Supor nonstick pan was heated by liquid gas	NA	without; The kitchen was refreshed with fresh air thoroughly through the door and the ventilation between each experiment, till the kitchen air returned to background level when there was no cooking.	ND	ND	within minutes	ELPI	NA	0.006-10.0	ND	Mean peak value between 400 and 460 sec: Rapeseed 4090 (PM1.0) 6190 (PM2.5) 21.23 (PM10); Sunflower 3120 (PM1.0) 6130 (PM2.5) 25200 (PM 10.0); Corn 2530 (PM1.0) 4650 (PM2.5) 18330 (PM10.0); Soybean 3350 (PM1.0) 5870 (PM2.5) 25590 (PM10.0). Mean deposition value between 920 and 1000 sec: Rapeseed 3000 (PM1.0) 4410 (PM2.5) 11690 (PM10.0); Sunflower 2190 (PM1.0) 4050 (PM2.5) 11420 (PM10.0); Corn 214…	ND	Rapeseed and sunflower produced high PM2.5 around 6.1 mg/m3, in comparison with those of soybean and corn (5.87 and 4.65 mg/m3, respectively) at peak emission time between 340 and 460 sec since heating oil, but with the same level of particle numbers 6–9 × 10^5/cm3. Mean values of PM1.0/PM2.5 and PM2.5/PM10 at peak emission time are around 0.51–0.66 and 0.23–0.29. After 15 min naturally depositio…	ND	NA	medium
Jessica Tryner et al.	10.1080/02786826.2017.1380779	laboratory	NA	NA	ND	frying	The gasifier cookstove tested in this study was a modular laboratory prototype that allowed design and operational parameters to be precisely controlled	air gasifier cookstove during	LPG; Douglas fir wood chips; kerosene,	pork	ND	ND	ND	ND	within seconds/minutes	The number size distribution of particulate matter emitted from the stove was measured at 1 Hz using a TSI Fast Mobility Particle Sizer (FMPS) 3091. The FMPS measured the concentration of particles ranging from 6.04 to 532 nm in mobility diameter with a resolution of 16 size channels per decade.	NA	26-60	ND	ND	ND	The results showed that compared with no addition (NA, 4.008 ± 0.43 nm) in soaked pork, the smaller diameters of CNPs (0.968 ± 0.44 nm) were found in CNPs-NaNO2-20 group (addition 20 mg/kg NaNO2), the larger (155.8 ± 7.30 nm) in CNPs-TP-100 group (addition 100 mg/kg TP). The diameter of CNPs was positively correlated with the added concentration.	ND	NA	high
Hye Kwan Kong et al.	10.1007/s11356-020-10670-x	South Korean	ND	Domestic	ND	roasting	ND	ND	ND	Pork belly and mackerel, which are the staple meat and fish products of Korean	ND	12 ventilation conditions: No ventilation; Natural ventilation(single-sided), hood range; Hood range; Natural ventilation(cross), hood range; Air cleaner; Natural ventilation(single-sided), air cleaner; Natural ventilation(single-sided); Natural ventilation(cross), air cleaner; Natural ventilation(cross); Natural ventilation(single-sided), air cleaner, hood range; Air cleaner, hood range; Natural…	12	12	1	continuous measuring equipment (BAM- 1020, Met One Instruments, Inc. USA) based on the beta-ray absorption method was used to measure changes in PM10 and PM2.5 concentrations in real time	NA	2.5; 10.0	PM2.5: 13.24 (SD 13.54)-96.25 (36.62); PM10: 16.95(SD18.76)-127.01(57.36)	ND	come nella collona U	PM10 concentrations were 246.27 and 1227.71 μg/m3 while the PM2.5 concentrations were 161.93 and 760.82 μg/m3 for pork belly and mackerel cooking, respectively. PM10 and PM2.5 concentrations generated during the cooking of pork belly and mackerel varied depending on the ventilation condition, but they were high when inappropriate ventilation methods were used	ND	NA	medium
Tianxin Li et al.	10.1016/j.scitotenv.2016.01.038	Lanzhou (36°N; 103°40'E), northwest China	Urban	Domestic	Usually, the heating season in Lanzhou lasts for 5 months, from November to March.	ND	ND	ND	ND	ND	ND	ND	54	54	24	Indoor PM2.5 samples were taken from two locations, the kitchen and the bedroom, in each household using air sampling pumps (LP-5, BUCK, USA) with a PM2.5 cutter connected at a flow rate of 2 L/min with a sampling duration of 24 h. The flow rate of the sampling device was calibrated using a soap bubble flow corrector. The PM2.5 samples were collected on Teflon membrane filters (PALL, USA), with a…	NA	2.5	Heating season: 48 ~ 279; non-heating: 9 ~ 388	125 ± 51 (heating season), and 80±67 (non-heating season)	like in the column on the left	The average concentrations of PM2.5 in the kitchen were 125 ± 51 during the heating season, and 80±67 during the non-heating season. Indoor PM2.5, from indoor combustion sources but also outdoor penetration, contributed to about 75% of the total PM2.5 exposure. Much higher indoor concentrations and inhalation exposure levels were found in households using coal for cooking compared to those using …	ND	NA	medium
Benoît Brandelet et al.	10.1016/j.biombioe.2017.10.047	laboratory	NA	NA	ND	NA	NA	The WABI (D2I INVICTA, DONCHERY, FRANCE) firewood stove that was designed, built and purchased in 2012 with a nominal thermal heat output of 6 kW was used.	split beech (Fagus sylvatica) logs of 12 cm of diameter from a 40-year-old beech	NA	NA	ND	ND	ND	ND	The Total Suspended Particles (TSP) were out-stack sampled during the entire period thanks to an isokinetic probe at 283 cm3 s−1 STP on a quartz filter heated at 160 °C. For the particles size determination concentration, an Electric Low Pressure Impactor (ELPI) heated at 160 °C was used (DEKATI, KANGASALA, FINLAND).	The gaseous composition of the smoke was studied thanks to a gas analyser PG 350 (HORIBA, KYOTO, JAPAN) which uses different analysis methods: chemiluminescence detectors (NO); Nondispersive infrared sensor (SO2, CO, CO2); paramagnetic detector (O2). The Total Volatile Organic Compounds (TVOC) were measured with a Flame Ionization Detector. Many micro-analyzes were performed on the same filter as…	1.0; 0.1	ND	48800 (top-down ignition); 72100 (traditiona ignition)	ND	comparison of the effects of traditional stove ignition with paper under the wood versus the Top-Down ignition of a wood crib is made, comparing the gaseous and particulate emissions. Top-Down ignition reduced the unburnt gas emissions by a factor of 2. The Total Suspended Particle (TSP) emission was reduced by about 1/3, while Organic Carbon (OC) was reduced by 73% relative to traditional under-…	ND	NA	low
L. A. Wallace et al.	10.1111/ina.12163	ND	ND	Domestic	ND	heating	NA	Two identical single-coil, 120-volt alternating current electric burners	electric	NA	NA	ND	200	200	2-100	condensation particle counters (CPC; Model 3007; TSI, Shoreview, MN, USA) to measure different concentrations of particles >10 nm (in electrical mobility diameter)	NA	<0.1	ND	ND	ND	Ultrafine particles are observed when metal surfaces, such as heating elements in electric appliances, or even empty cooking pans, are heated. The source of the particles has not been identified. Using repeated heating of an electric burner, several types of cooking pans, and a steam iron, the increase in the number of particles (>10 nm) can be reduced to 0.	ND	NA	Low
W. R. Ott et al.	10.1111/ina.12292	San Francisco Bay Area, USA	urban	Restaurant	Over a 3-1/2-year period ending in April 2015	23 different cooking styles	ND	ND	ND	VARIABLE	ND	ND	73	73	1-1.5	the battery-powered real-time air monitors operated continuously, measuring and logging UFP number concentrations and fine particle (FP) concentrations for estimating PM2.5 mass concentrations. We employed a portable battery-operated Model 3007 Condensation Particle Counter (CPC) from TSI (Shoreview, MN, USA) that can detect particles between 10 nm and 1 lm	NA	2.5; <0.010	1.5 - 454	36.3	ND	The mean ultrafine number concentrations in the restaurants on dinner visits averaging 1.4 h was 71 600 particles/cm3, or 4.3 times the mean concentration on car trips, and 12.3 times the mean background concentration in the residence. Restaurant PM2.5 mass concentrations averaged 36.3 lg/m3, ranging from 1.5 to 454 lg/m3, but were relatively low on most visits: 43% of the indoor means were below…	ND	NA	LOW
Catherine O'Leary ET AL.	10.1111/ina.12542	ND	ND	laboratory	ND	mixed	laboratory	gas stove	gas	mixed food products danish food	ND	controlled ventilation conditions in a test chamber; two ventilation scenarios that varied the flow rate and location of the ventilation extract	4	4	time of cooking+30min	The PM2.5 concentration and particle size distribution were measured in the test chamber using a Grimm 11‐R Mini Laser Aerosol Spectrometer optical particle counter (OPC), factory calibrated using dolomite dust. It measures particles with diameters between 0.25 and 32 μm and classifies them into 31 size bins. It detects concentrations between 0.1 μg/m3 and 100 mg/m3, and identifies particle count…	NA	2.5	ND	ND	ND	Temporal PM2.5 concentrations and particle size distributions were recorded using an optical particle counter (OPC), and gravimetric sampling was used to determine calibration factors. Mean emission rates and source strengths varied between 0.54—3.7 mg/min and 15—68 mg, respectively, with 95% confidence. Using a cooker hood (apparent capture efficiency > 90%) and frying in non‐stick pans were fou…	ND	NA	medium
Kuo-Pin Yu et al.	10.1016/j.buildenv.2015.06.024	northern Taiwan	urban	Domestic	between October 2011 and May 2012	frying, baking and stewing	ND	gas stove	gas	ND	ND	ND	5	5	24	Scanning Mobility Particle Sizer TM (SMPS, Model 3936L76, TSI Inc., USA) and a 6-channel (0.3, 0.5, 1.0, 2.5, 5.0 and 10.0 mm) optical particle counter (HANDHELD 3016 IAQ, LIGHTHOUSE, USA)	NA	0.101-10	PM10, PM2.5, PM1, and PM0.1 up to around 500, 100, 50 and 5 mg/m3, respectively; PM18: 163 to 2680;	ND	ND	Twenty-four-hour monitoring of the particle concentration shows that particle number concentrations during non-cooking hours ranged from 1220 to 6200 particles/cm3 and increased to 1,400,000 particles/cm3 during cooking hours, and most of these particles are ultrafine ones. Some of the measurement results (PM10 > 80 mg/m3 at 3 kitchens) exceed the current indoor air quality standards of Taiwan.	ND	NA	medium
M. Schiavon et al.	10.2495/ESUS130221							gas stove	gas	beef-steak	ND	hood filter	4	4	0.5	GRIMM analyzer 1.108	NA	PM1.0; PM2.5; PM10.0	0-5500	371-3413	ND	The thermal power of cookers can influence PM emission during beef-steak cooking. Using the most powerful cooker, PM10 production resulted 3 times higher than using the smaller one. In particular, this increase is connected with a significant generation of PM1.0.	73-1180	NA	low
Christian L'Orange et al.	10.1016/j.esd.2012.08.008	laboratory	ND	laboratory	ND		laboratory	wood and gas stove	wood; gas	NA	NA	constant-volume displacement pump moved air through the hood at 6 m3/min with inlet air passing through high efficiency particulate air (HEPA) filters to remove background aerosol	ND	ND	0.75	The cascade impactor (NanoMOUDI 125-R, MSP Corp., Shoreview,MN, USA) segregated particles by inertial impaction into 13 size ranges from 0.01 to 10 μm in a aerodynamic diameter. A cyclone separator (URG-2000-30ENB, URG Corp., Chapel Hill, NC, USA) and filter pack (URG-2000-30FDT) were used to sample particles with 10 μm in diameter and smaller (PM10) for subsequent gravimetric analysis.	NA	0.1-10.0	ND	ND	ND	Emitted particle size distributions do not depend strongly on stove construction material or stove wall temperature. Variations were found, however, in the size and total mass of particles released from natural draft cook stoves compared to those from gasifier stoves. Cooking pot temperatures had a substantial effect on emitted particle size distributions, which implies that the size of particles…	ND	NA	medium
Prashant Kumar et al.	10.1016/j.envint.2022.107155	Dhaka (Bangladesh); Chennai (India); Nanjing (China); Medellín (Colombia); S˜ao Paulo (Brazil); Cairo (Egypt); Sulaymaniyah (Iraq); Addis Ababa (Ethiopia); Akure (Nigeria); Blantyre (Malawi); Dar-es-Salaam (Tanzania) and Nairobi (Kenya)	Urban	Domestic	between March and October 2021	variable	variable	variable	natural gas, LPG, charcoal, kerosene, electric, ethanol	variable	ND	natural or dual (natural+forced)	60	60	168	Aeroqual Series 500 Portable Air Quality monitor with PM sensor (AEQAL, 2018) for PM2.5 and PM10 measurements	NA	2.5; 10.0	1-1653	9-254	6-295	The highest average PM2.5 (PM10) concentrations were in Dhaka 185 ± 48 (220 ± 58). μg m􀀀 3 owing to small kitchen volume, extensive frying and prolonged cooking compared with the lowest in Medellín 10 ± 3 (14 ± 2) μg m􀀀 3. Dual ventilation (mechanical and natural) in Chennai, Cairo and Sulaymaniyah reduced average in-kitchen PM2.5 and PM10 by 2.3- and 1.8-times compared with natural ventilation (…	ND	NA	high
Megan L. Benka-Coker et al.	10.1016/j.envpol.2019.113697	La Esperanza, Department of Intibuc_x0001_a, Honduras	rural	Domestic	ND	variable	variabe	30 households with a traditional cookstove and 17 households with Justa cookstove	gathered wood, including split logs and sticks, as the primary fuel; burning small sticks of a local wood called ocote (a species of pine) and corncobs to start the fire	ND	ND	non-insulated open combustion area; sometimes a chimney	47	47	24	PM2.5 was sampled using an aerosol nephelometer, the personal DataRam (pDR) 1200 (Thermo Fisher Scientific Inc., Waltham MA, USA); DiSCmini to measure UFP	NA	2.5; UFP (<0.6)	11-1467	180	301	The median 24-h PM2.5 concentration (n ¼ 27) was 79 mg/m3 (interquartile range [IQR]: 44e174 mg/m3); traditional (n ¼ 15): 130 mg/m3 (IQR: 48e250 mg/m3); Justa (n ¼ 12): 66 mg/m3 (IQR: 44e97 mg/m3). The median 24-h PNC (n ¼ 44) was 8.5 _x0002_ 104 particles (pt)/cm3 (IQR: 3.8 _x0002_ 104e1.8 _x0002_ 105 pt/cm3); traditional (n ¼ 27): 1.3 _x0002_ 105 pt/cm3 (IQR: 3.3 _x0002_ 104e2.0 _x0002_ 105 pt…	ND	NA	medium
Zafar Fatmi et al.	10.3390/ijerph17041287	Sindh, Pakistan	Rural	Domestic	ND	ND	ND	Traditional stove using biomass; Improved stove using biomass; LPG stove	biomass, LPG	ND	ND	ND	39	36	48	PM2.5 was measured using a single MicroPEM version 3.2 instrument; RTI (Research Triangle Institute) International	NA	2.5	Biomass: 4.2-4930; LPG (4.2-2580)	Biomass: 531; LPG 69.9	ND	Linear regression analysis indicated that in comparison with kitchens using natural gas, daily average PM2.5 concentrations were substantially higher in kitchens that used biomass in either a chimney stove (mean di erence 611, 95% CI: 359, 863 _x0016_g/m3) or traditional three-stone stove (mean dierence 389, 95% CI: 231, 548 _x0016_g/m3). Daily average concentrations of CO were significantly incr…	ND	NA	Medium
Jian Sun et al.	10.1016/j.atmosenv.2020.117750	North China	ND	Restaurant	ND	mixed	ND	ND	ND	six typical and commercial cuisines including Sichuan cuisine, Shaanxi Cuisine, Northeast Chinese cuisine, Shaanxi snacks, hotpot and Chinese barbecue (BBQ) in the Northern China	ND	exhaust duct	6	6	1	The samples were collected directly from the exhaust duct of the kitchen using a DRI MEDVOL gas/particle sampler at a total flow rate of 66.7 L min- 1.	Carbonaceous fractions, including organic carbon (OC) and element carbon (EC), on a punch of quartz filter (0.526 cm2) were analyzed on a thermal/optical carbon analyzer (DRI Model, 2001; Calabasas, CA, USA) following the IMPROVE_A protocol. or the measurement of water-soluble inorganic ions, a quarter of the quartz filter was extracted with deionized water [10 mL, resistivity of 18.2 million ohm…	2.5	from 290 +/- 104 to 3400 +/- 978	ND	like in the column on the left	The PM2.5 concentration levels in the kitchen exhausts ranged from the lowest of 290 � 104 μg m􀀀 3 for the Northeast Chinese cuisine to the highest of 3400 � 978 μg m􀀀 3 for the Chinese BBQ. The PM2.5 composition was predominantly comprised of organic carbon (OC), especially for Sichuan and Shaanxi cuisines. The highest PAHs concentration was shown in the Chinese BBQ, followed by the stir-fry-dom…	ND	PM2.5; PAH	high
Brett C. Singer et al.	10.1016/j.buildenv.2017.06.021	San Francisco Bay area of California, USA	Urban	Domestic	ND	water boiling	ND	gas stove (cooktop, oven bottom burner, and broiler top burner, as available)	natural gas	water boiling	NA	windows closed, no forced air unit (FAU) operation, and no mechanical exhaust	9	9	varied from a minimumof 54min to a maximum of overnight	TSI DustTrak II Model 8530 (Forward light scattering); TSI 3781 Condensation Particle Counter (Growth by H20 condensation; laser counting)	NA	0.006-2.5	ND	ND	ND	In all homes, the highest 1 h integrated PN exceeded 2 _x0001_ 105 cm_x0003_3-h, and the highest 4 h PN exceeded 3 _x0001_ 105 cm_x0003_3-hr in the kitchen.	ND	NA	medium
Ellison M. Carter et al.	10.1021/es405723w	China	labor	NA	ND	water boiling	NA	gasifier cookstoves	Pelletized fuel	water boiling	NA	with and without chimney	ND	ND	ND	Particulate matter (PM) measurements were made using a red laser scattering photometer (Aprovecho Research Center; Cottage Grove, Oregon) with a resolution of 15 μg/m3 and a 1 s response time. All sensors were calibrated prior to conducting measurements. We also measured integrated gravimetric fine PM (aerodynamic diameter ≤2.5 μm; PM2.5) for each stove during the WBT.	NA	2.5	ND	ND	ND	Compared with several widely disseminated “improved” cookstoves selected from the literature, on average, the four Chinese gasifier cookstoves had lower PM2.5 emissions and higher CO emissions. Medium power stove operation emitted nearly twice as much PM2.5 as was emitted during high power stove operation, and the lighting phase of a cooking event contributed 45% and 34% of total PM2.5 emissions …	ND	NA	medium
Anna Leavey	10.1021/acs.est.5b02139	Udaipur, India	Urban and rural	Domestic	between June and August, 2012,	Cooking	separated form other rooms	traditional three-stone cookstove	biomass (e.g. wood)	ND	ND	no ventilation	51	51	22	DustTrak 8532	NA	2.5	335-101920	9835	3.21-4.96	Mean PM2.5 concentrations during steady-state mode were 9835 μg m−3. Fuel amount, fuel diameter, duration of the cookstove run, roof-type, and the room dimension explained between 7% and 21% of the variability for the pollutant metrics.	ND	NA	high
Liu Sun et al.	10.1080/10962247.2020.1823525	Halifax and Edmonton, Canada	Urban	Domestic	both winter (January to April) and summer (June to September)	cooking	ND	The cooktop fuel type (78% electric, 22% gas) was in general agreement with the responses from the nationwide Canadian Human Activity Pattern Survey 2 (84% electric, 16% gas).	8% electric, 22% gas	ND	ND	The range hood ventilation type was vented (55%), unvented (22%), or unknown (5%). About 18% of the homes did not have a range hood.	132	132	24	DustTrak (Model 8520, TSI, MN, U.S.)	NA	2.5	ND	ND	ND	The GM source strength from cooking was 0.73 mg min−1 (geometric standard deviation (GSD) = 4.3) over an average cooking time of 17 minutes (GSD = 2.6). The GM emission mass was 12.6 mg (GSD = 5.3). The GM exposure from a single cooking event was 12 μg m−3 h (GSD = 6.6). The average number of cooking events per day was 2.4 (SD = 1.5) times. Cooking contributed about 22% to the total daily PM2.5 e…	ND	NA	medium
Kelsey R. Bilsback et al.	10.1021/acs.est.8b07019	laboratory	NA	NA	ND	Firepower Sweep Test		Biomass and fossil-fuel	LPG; kerosene; charcoal;	NA	NA	ND	8	8	ND	Sampling media for time-integrated measurements included Teflon filters (analyzed for PM2.5 mass), quartz filters (analyzed for organic carbon, EC, organic carbon absorption artifacts, inorganic anions and cations, particle-phase PAHs, and carbohydrates), and polyurethane foam plugs (analyzed for gas-phase PAHs). Other time-integrated sampling media included a vacuum canister fitted with a critic…	OCEC Carbon Aerosol Analyzer 5L; Sunset Laboratory, Inc; Tigard, OR; DX-500 Ion Chromatography System; Dionex; Waltham, MA; CS-3000 Ion Chromatography System; Dionex; Waltham, MA; Agilent 6890/5973 Inert, Agilent Technologies, Santa Clara, CA; 1260 Infinity; Agilent Technologies; Santa Clara, CA; Gas chromatograph mass spectrometer (GC-17A); Shimadzu; Kyoto, Japan; HPLC 1050 series; Agilent Techn…	2.5	ND	ND	ND	We find that improved biomass stoves tend to reduce PM2.5 emissions; however, certain design features (e.g., insulation or a fan) tend to increase relative levels of other coemitted pollutants (e.g., EC ultrafine particles, carbonyls, or PAHs, depending on stove type). In contrast, the pressurized kerosene and LPG stoves reduced all pollutants relative to a traditional three-stone fire (≥93% and …	ND	organic matter, CO, CO2; inorganic ions	High
Hongmei Xu et al.	10.1016/j.chemosphere.2020.127758	northwestern China	urban	Restaurant	between March 11 and March 16, 2019	different cuisine types	ND	gas and electric stove	gas or electric	different cuisine	ND	umbrella-shaped hoods and electrostatic fume purifiers	14	14	two dining peak periods, including 11:30e14:30 LST (lunch) and 18:00e21:00 LST (dinner)	Mini-Vol air sampler (Airmetrics, Springfield, OR, USA)	Gas chromatography	2.5	ND	41.5-280	2.86-222	The mean concentration of total quantified organic compounds (SPM_O) ranged from 1112 to 32,016 ng m-3, with the maximum for the Chinese barbecue restaurants. The SPM_O accounted for an average of 11% of PM2.5 mass, demonstrating their significances in the cooking emissions.	ND	organic matter	medium
Nan Zhang et al.	10.1016/j.envpol.2017.04.033	China	urban	Domestic	ND	Frying	ND	ND	natural gas	sets of duplicate cooking samples were collected, using the most used 5 types of oil	ND	no ventilation and with the range hood on	35	35	7	Personal exposure monitors (PEM-PM2.5; BGI Inc., Waltham, MA, USA) and pumps (Buck Inc, Orlando, FI, USA) were used for the sampling.; sampling for water-soluble ions, OC, EC and PAHs quartz fiber filter (Pall-Gelman, Ann Arbor, MI, USA); sampling for metal ions: 37 mm polypropylene-fiber filter (Pall-Gelman, Ann Arbor, MI, USA)	Zn, Pb, Mn, Cr, Ni, As, Cu and Cd, using inductively coupled plasmaemass spectrometry analysis method (ICP-MS, Agilent 7500a, Agilent Co, Santa Clara, USA); Mg, Ca, Fe, Na, P and K, using inductively coupled plasma-optical emission spectrometry method (ICP-OES, Vista-MPX, Varian Co, Palo Alta, CA, USA); Naþ, Kþ, Cl_x0001_, NO3_x0001_and SO4 2_x0001_analysis using the ion chromatograph method (DX-…	2.5	ND	ND	ND	The analysis showed that OC was the primary composition in the chemical profile; Na was the most abundant element that might be due to the usage of salt; Cr and Pb, NO3_x0001_ and SO4 2-, Phe, FL and Pyr were the main heavy metals/water-soluble ions/PAHs, respectively		14 elements, 5 water-soluble ions, organic carbon (OC), elemental carbon (EC) and 11 polycyclic aromatic hydrocarbons (PAHs)	High
Marc Fadel et al.	10.1016/j.envres.2022.113032	different locations in Lebanon	ND	domestic	ND	Small pieces of beef grilled on both sides; Large pieces of skinned chicken grilled on both sides; Burger grilling, french fries frying, use of vegetables, daily dishes served;	ND	ND	LPG; Charcoal	beef; chicken; french fries; vegatables;	ND	ND	7	7	0.33	PM2.5 samples were collected onto 150 mm pure quartz microfibres filters (Fiorini, France) using a high-volume sampler (CAV-A/mb, MCV S.A., Spain) operating at 30 m3/h	The organic carbon (OC) and the elemental carbon (EC) were quantified on a punch of the quartz filter (1 cm2) by a thermal optical; transmission technique. The organic compounds were quantified by gas chromatography (ISQ 7000, Thermo Scientific, United States of America) coupled to a mass spectrometer (GC-MS). Mg, Mn, Al, Na, Ba, Ca, Fe, K, Ni, P, Pb, S, Sr, Ti, and Zn were quantified by Inductiv…	2.5	ND	ND	ND	The main component in the PM2.5 from the different sources was carbonaceous matter with a mass contribution to PM2.5 of 49% for cooking activities, 53% for wood burning, 66% for beef grilling, 72% for chicken grilling, and 74% for diesel generator with different OC/EC concentration ratios.	ND	carbonaceous fraction, ions, elements, and organic species comprising n-alkanes, polycyclic aromatic hydrocarbons, carboxylic acids, levoglucosan, dioxins, furans, and dioxin-like polychlorobiphenyls	High
Célia Alves et al.	10.3390/ijerph17145256	Aveiro, Portugal	urban	Domestic	October and November 2017	variable	ND	gas; electric	gas, electricity	ND	ND	natural	4	4	48-72	TCR Tecora; MiniVol; 47 mm diameter quartz filters	The carbonaceous content (organic and elemental carbon, OC and EC) of PM2.5 samples was analysed by a thermal-optical transmission technique. GC-MS from Agilent (Santa Clara, CA, USA) with single quadrupole. The chromatographic system (GC model 7890B, MS model 5977A) for volatile organic compounds; The morphology and chemical composition of selected PM2.5 samples were characterised by SEM-EDS (A …	2.5	ND	14-30	2022-12-11	Total carbon represented up to 40% of the PM2.5 mass. In general, the indoor OC/EC ratios were higher than the outdoor values. Indoor-to-outdoor ratios higher than 1 were observed for VOCs, carbonyls and plasticisers. PAH levels were much higher in the outdoor air. The particulate material was mainly composed of soot aggregates, fly ashes and mineral particles.	ND	carbonaceous content (organic and elemental carbon, OC and EC) by a thermo-optical technique and for polycyclic aromatic hydrocarbon (PAHs) and plasticisers	medium
Ana M.P. Vicente et al.	10.1016/j.scitotenv.2021.146090	Aveiro, Portugal	urban	Restaurant	InMay and June 2012	boiling and grilling	ND	gas; electricity	gas; electricity	poultry	ND	The circular-shaped chimney is equipped with an electric draft inducing fan but does not have any filtration unit or other treatment system of flue gases	3	3	ND	47 mm diameter quartz fibre filters previously baked at 500 °C for 6 h using Echo TCR Tecora samplers with a standard European inlet head	chromatography–mass spectrometry (GC–MS)	2.5	ND	27-127	3.111	Cholesterolwas the prevalent sterol. Its highest values were obtained in particles from the charcoal-grilled chicken restaurant (621 ±233 μg g−1 PM2.5). Oleic and palmitoleic were the unsaturated fatty acids identified at highest concentrations (fromtrace levels to 34.4 and to 6.89mg g−1 PM2.5, respectively). Resin acids, such as dehydroabietic and abietic, were detected in all samples from the w…	ND	PAHs and organic compounds	high
Nicholas Nakora et al.	10.1007/s42452-020-03800-0	Mbarara Municipality western Uganda	rural		wet and dry season: between December 2017 and April 2018		Kitchen volumes ranged from 12 to 81 m3 and their roofs (96.6%) were metallic while only 3.4% were concrete. Kitchen walls were made of mud (5%), wood (20%) or concrete (74%) and floors were wood (3.4%), mud (41%), and cement (56%). 23% of the respondents did not open doors while cooking but only 3.4% did not open doors. 22% of the houses studied were located near the road and only 6.8% showed cr…	open fires	biomass (charcoal)	ND	ND	natural	60	60	24	PM2.5 was measured using University of California Berkeley Particle and Temperature Sensor (UCB-PATS),	heavy metals were determined using Inductively Coupled Plasma Optical Emission Spectrometry (ICP-OES)	2.5	ND	1-1706	0.5-2.0	Charcoal fuel generates particulate matter, carbon monoxide and heavy metals which pollutes indoor air pollution especially in kitchens;	ND	metal ions	medium
Wei Du et al.	10.1016/j.envpol.2020.115592	across northern (Shanxi) and southern China (Sichuan and Guizhou)	ND	ND	ND		ND	11 fuel-stove combinations	biomass (Maize stalk, Corncob, Bean straw, Wood, Brushwood, Corncob, Bamboo)	ND	ND	chimney that vents smoke outside the kitchen	ND	ND	ND	PAHs bounded to PM2.5 were collected on unloaded quartz fiber filters (QFFs, Tissuquartz 2500QAT-UP, PALL Corporation, USA) usinga cascade impactor (PEM, SKC, PA, USA) connected to an active pump (SKC, PA, USA).	gas chromatograph coupled with a mass spectrometer (GC-MS, Agilent GC 6890, MS 5973, USA) with a HP-5MS capillary column in the electron ionization (EI) mode	2.5	ND	ND	ND	The gas-particle distribution indicated that the absorption of PAHs by organic carbon in particulate matter (PM) was the dominant sorption mechanism in gas-particle distribution	ND	PAHs	Low
Chunshui Lin et al.	10.1016/j.scitotenv.2021.151700	Laboratory (Institute of Earth Environment, Chinese Academy of Sciences (34°23′N, 108°89′), Xi'an, China)	urban	NA	from June 22 to July 21, 2019 (summer)	cooking oils	kitchen with a space of ~10 m2 in area	gas stove	butane gas	representative cooking oil (i.e., rapeseed oil)	ND	ND	ND	ND	ND	The LToF SP-AMS is equipped with an aerodynamic lens of PM2.5 which transmits aerosol particles of sizes between 80 nm and up to 3 μm efficiently	the high resolution time-of-flight aerosol mass spectrometer (HR-ToF-AMS)	2.5	ND	ND	ND	The ambient cooking PAH profile waswell correlated (r2 of 0.87)with that for frying oil fume, suggesting cooking oil was the major source of PAHs instead of the food being cooked. The results show the particle-bound PAHs from cooking can be an important source of ambient PAHs inmost Chinese cities.	ND	PAHs	Low
Benjamin A. Musa Bandowe et al	10.1016/j.envpol.2021.117754	Hong Kong, China	urban	Restaurant	ND	Baking, Frying (pan frying, stir frying), Grilling, Steaming	ND	gas and electric stove	twon gas; electricity	common cuisines in Hong Kong	ND	ND	3	3	1.5-3	particle sampler (DRI MEDVOL); A Teflon-membrane (47 mm), Nuclepore polycarbonate membrane and quartz-fiber filter (47 mm) were positioned in the filter holders separately	elemental analysis by an Energy Dispersive X-Ray Fluorescence analyzer (ED-XRF, Epsilon 5, PANalytical Company, Almelo, The Netherlands). in a clean tube until analysis. A Dionex-600 Ion Chromatograph (Dionex Inc., Sunnyvale, CA, USA) was used for the determinations of cations and anions in the aqueous extracts. Agilent 7890N gas chromatograph coupled to an Agilent 5975C mass selective detector (…	2.5	ND	177.4 ± 50.6 to 711.5 ± 222.6	like in the column on the left	The concentration ranges of the Σ30PAHs, Σ17OPAHs and Σ4AZAs and Σ7Carbonyls in the samples were 9627–23,452 pg m􀀀 3, 503–3700 pg m􀀀 3, 33–263 pg m􀀀 3 and 158 – 5328 ng m􀀀 3, respectively.	ND	PAHs, oxygenated PAHs (OPAHs) and azaarenes (AZAs) mixtures; metal ions	medium
